# Supplementary material for: Standardization of Human Calcific Aortic Valve Disease in vitro Modeling Reveals Passage-Dependent Calcification
Source: Front Cardiovasc Med. 2019 Apr 16;6:49. doi: 10.3389/fcvm.2019.00049 (PMC6476921; doi:10.3389/fcvm.2019.00049)
Supplement: Supplementary file 1 [file Data_Sheet_1.xlsx]

## Sheet: Caption
Human valvular interstitial cell whole cell (tab 2), cytoplasimc-enriched fraction (tab 3), and nuclear-enriched fraction (tab 4) proteomics datasets; n = 4 donors.
NM = normal control media
OM = osteogenic media
PM = pro-calcifying media
P1 = passage 1
P4 = passage 4

## Sheet: Whole cell proteomics
															Median intensity	347144	353061	367530	350743	337844	383103	371476	389901	376761	352560	392735	387400	367569	356356	422154	381290	384418	385362	362734	361377	391598	371176	413150	418269
															# of Proteins	1933	1909	1946	1949	1963	1965	1991	2019	2017	1987	2029	2037	1938	1931	1937	1931	1943	1965	1947	1949	1965	1976	1997	2002
															Component	Whole cell	Whole cell	Whole cell	Whole cell	Whole cell	Whole cell	Whole cell	Whole cell	Whole cell	Whole cell	Whole cell	Whole cell	Whole cell	Whole cell	Whole cell	Whole cell	Whole cell	Whole cell	Whole cell	Whole cell	Whole cell	Whole cell	Whole cell	Whole cell
															Media	NM	OM	PM	NM	OM	PM	NM	OM	PM	NM	OM	PM	NM	OM	PM	NM	OM	PM	NM	OM	PM	NM	OM	PM
		GO terms					XINA Cluster#				P1 OM/NM ratio		P1 PM/NM ratio		Passage	P1	P1	P1	P4	P4	P4	P1	P1	P1	P4	P4	P4	P1	P1	P1	P4	P4	P4	P1	P1	P1	P4	P4	P4
Gene name	Description	Biological Process	Cellular Component	Molecular Function	KEGG Pathways	WikiPathways	Donor 1	Donor 2	Donor 6	Donor 7	fold change	P-value	fold change	P-value	Donor	6	6	6	6	6	6	7	7	7	7	7	7	1	1	1	1	1	1	2	2	2	2	2	2
Sept2	Isoform 2 of Septin-2	cell division;cell organization and biogenesis;regulation of biological process;response to stimulus	cytoplasm;cytoskeleton;cytosol;membrane;nucleus	nucleotide binding;protein binding			6	6	6	6	0.963	0.943641	1.046	0.990978		20.2068	19.3547	19.2499	15.2218	14.7508	15.5129	18.554	18.5277	20.3391	16.9858	16.9288	18.3032	17.0403	13.5697	18.6249	18.0125	15.4161	17.917	16.4421	16.2014	15.8948	17.2679	14.4098	16.3895
Sept4	Isoform 4 of Septin-4	cell death;cell division;cell organization and biogenesis;regulation of biological process	mitochondrion;nucleus	catalytic activity;metal ion binding;nucleotide binding;protein binding;structural molecule activity			13	17	19	17	0.757	0.664282	0.769	0.475542		0	0	0.0515507	0	0	0.0384236	0.0708643	0.0511209	0.0437992	0	0	0	0.0839149	0.0376284	0	0	0	0	0.0434371	0.0444555	0.0379532	0	0	0
Sept5	HCG2002594, isoform CRA_c	regulation of biological process;response to stimulus	cytoskeleton;membrane	catalytic activity;nucleotide binding;protein binding;structural molecule activity		Parkinsons Disease Pathway; Parkin-Ubiquitin Proteasomal System pathway	6	6	6	6	0.894	0.89631	0.825	0.227398		0.419855	0.34767	0.436164	0.334001	0.325168	0.244384	0.464397	0.546455	0.619129	0.741417	0.729664	0.692198	0.620205	0.405119	0.546708	0.702906	0.585353	0.72486	0.516314	0.471626	0.687072	0.451498	0.450434	0.575112
Sept8	Septin-8		cytoplasm;cytoskeleton	nucleotide binding;protein binding	Bacterial invasion of epithelial cells		6	17	6	17	0.75	0.146515	1.06	0.997172		2.43909	1.66932	2.32106	2.54402	0.761355	3.00332	2.37455	1.71828	3.00599	1.11594	1.04533	1.68602	2.13637	1.35532	2.13313	1.87985	1.18127	1.84006	3.43797	1.88294	2.58094	1.39795	1.11585	1.77036
Sept9	Septin-9	cell division;cell organization and biogenesis;regulation of biological process	cytoplasm;cytoskeleton	catalytic activity;nucleotide binding;protein binding	Bacterial invasion of epithelial cells		6	6	6	6	1.078	0.979508	1.127	0.935691		7.65376	7.09647	8.08077	5.35713	6.0777	6.08271	7.6752	8.11602	8.72848	7.16009	7.45051	8.7153	8.01928	8.51372	8.85757	8.37304	8.62736	8.08944	7.662	7.87877	6.37318	5.64475	5.44407	6.28014
Sept10	Septin 10, isoform CRA_c	cell division	cytoplasm;cytoskeleton	nucleotide binding;protein binding			4	6	6	6	1.214	0.792778	1.253	0.786155		0.182812	0.17328	0.187843	0.141696	0.0742473	0.201119	0.366549	0.394388	0.420388	0.2584	0.289553	0.384525	0	0.155112	0.264165	0	0.123358	0.0406068	0.100358	0.179377	0.116304	0.0934584	0.0877515	0.163401
Sept11	Isoform 2 of Septin-11	cell division;cell organization and biogenesis	cytoplasm	nucleotide binding;protein binding			6	6	6	6	1.083	0.977801	1.128	0.935691		14.4336	13.6805	13.9787	11.4379	11.0657	11.5971	11.3249	13.014	13.1644	12.1165	11.6371	12.2313	11.8512	12.0881	13.7678	14.9874	12.4793	13.1597	11.6759	13.7301	12.1824	13.2246	11.6142	13.4584
AAK1	AP2-associated protein kinase 1	cell organization and biogenesis;metabolic process;regulation of biological process;transport	cytoplasm;cytosol;membrane	catalytic activity;nucleotide binding;protein binding			6	6	18	6	1.266	0.739953	1.435	0.364392		0.0438161	0.0801924	0.269277	0.0810162	0.0685472	0.354383	0.160949	0.285802	0.508614	0.252859	0.2602	0.346315	0.225327	0.0745618	0.201288	0.168212	0.349606	0.201308	0.15069	0.198741	0.198128	0.276904	0.197553	0.321592
AAMDC	Mth938 domain-containing protein	regulation of biological process	cytoplasm	protein binding			9	6	25	6	0.621	0.0301439	2.455	2.33653e-10		0.060123	0	0.325378	0.257042	0.179747	0.37253	0.685034	0.783356	0.988529	0.471973	0.575029	0.645768	0	0	0.158291	0.180112	0	0.223034	0.717305	0.447019	0.717874	0.7382	0.480969	0.796889
AARS	Alanine--tRNA ligase, cytoplasmic	metabolic process;regulation of biological process	cytoplasm;cytosol;membrane;mitochondrion	catalytic activity;metal ion binding;nucleotide binding;RNA binding	Aminoacyl-tRNA biosynthesis		6	6	6	6	0.684	0.0300172	0.851	0.402197		9.02619	6.26198	6.96661	10.3242	6.96191	7.27202	10.5811	6.71261	7.63355	10.3386	6.7985	6.75936	8.26915	5.9353	6.75143	5.85109	3.8754	4.83005	10.8743	7.06348	8.967	11.4382	6.44381	7.65863
ABCC1	Isoform 9 of Multidrug resistance-associated protein 1	cell organization and biogenesis;cellular component movement;metabolic process;response to stimulus;transport	membrane	catalytic activity;nucleotide binding;transporter activity		Irinotecan Pathway	6	6	6	6	1.021	0.99965	0.946	0.757795		0.465798	0.529099	0.710324	0.372838	0.516584	0.39789	0.388722	0.422442	0.357689	0.430156	0.496296	0.449662	0.789983	0.727597	0.649411	0.732435	0.604205	0.683464	1.21831	0.980354	0.979799	0.886489	0.82681	0.919661
ABCC3	Isoform 4 of Canalicular multispecific organic anion transporter 2	transport	membrane	catalytic activity;nucleotide binding;transporter activity		Constitutive Androstane Receptor Pathway; Codeine and Morphine Metabolism; Nuclear Receptors in Lipid Metabolism and Toxicity; Photodynamic therapy-induced NFE2L2 (NRF2) survival signaling; Drug Induction of Bile Acid Pathway; Fluoropyrimidine Activity	6	25	10	6	1.246	0.767714	1.566	0.153051		0.0299153	0.485157	0.267934	0.370339	0.494459	0.279497	0.168244	0.464553	0.283356	0.485946	0.509095	0.517762	0.139298	0.225227	0.240296	0.368488	0.428399	0.194836	0.110874	0.162934	0.12067	0.241229	0.312063	0.314005
ABCD1	ATP-binding cassette sub-family D member 1	cell organization and biogenesis;metabolic process;transport	cytoplasm;cytosol;membrane;mitochondrion	catalytic activity;nucleotide binding;protein binding;transporter activity	Peroxisome; ABC transporters		1	6	4	6	2.164	0.016344	1.025	0.948867		0.0470646	0.128757	0.0719975	0	0	0.0383104	0.0708199	0.113541	0.0715552	0.097222	0.112576	0.0814578	0	0.0946071	0	0	0	0.061106	0.0674627	0.0908539	0.0595575	0.0714181	0.0895793	0.0805134
ABCD3	ATP-binding cassette sub-family D member 3	cell organization and biogenesis;metabolic process;response to stimulus;transport	cytosol;membrane;organelle lumen	catalytic activity;nucleotide binding;protein binding;transporter activity		Nuclear Receptors in Lipid Metabolism and Toxicity	3	25	9	10	1.542	0.600699	1.007	0.982079		0.0162379	0	0	0.0345114	0	0.0238395	0	0.0524791	0.0339064	0.0203776	0.0612837	0.0205479	0.0207577	0.0347686	0.0137058	0.00807529	0.0340776	0.0117358	0.0136871	0.020122	0.016954	0.032556	0.0629383	0.0733613
ABCE1	ATP-binding cassette sub-family E member 1	cell organization and biogenesis;metabolic process;regulation of biological process;transport	cytoplasm;cytosol;membrane;mitochondrion;organelle lumen	catalytic activity;enzyme regulator activity;metal ion binding;nucleotide binding;protein binding			6	6	6	6	1.107	0.940895	1.016	0.948867		0.654837	0.709319	0.533025	0.790104	0.77816	1.24646	0.784717	1.00083	0.735157	0.850998	0.918925	0.912384	0.603017	0.448086	0.936029	0.568561	0.480415	1.06092	0.763994	0.771487	0.922826	0.622598	0.545309	1.15494
ABCF1	ATP-binding cassette sub-family F member 1	defense response;metabolic process;regulation of biological process;response to stimulus;transport	cytoplasm;cytosol;membrane;nucleus;ribosome	catalytic activity;nucleotide binding;protein binding;RNA binding;translation regulator activity			6	6	6	6	0.997	0.99965	0.972	0.873177		0.56856	0.558688	0.635731	0.972526	0.882478	0.502405	0.811685	0.85193	0.69803	0.584486	0.82548	0.748509	0.697472	0.597037	0.303845	0.577277	0.672101	0.678567	0.919516	0.839075	0.674437	1.28193	1.20301	1.24089
ABCF2	Isoform 2 of ATP-binding cassette sub-family F member 2	transport	membrane;mitochondrion	catalytic activity;nucleotide binding;transporter activity			24	25	25	25	0.749	0.767714	1.029	0.948867		0.0345068	0.018572	0.141173	0.25237	0.164341	0.193206	0.00884104	0.0233973	0.140648	0.208487	0.165097	0.188569	0.0156356	0.015543	0.107644	0	0.128205	0	0.0178678	0.0104284	0.122688	0.168183	0.169874	0.17686
ABHD14B	Alpha/beta hydrolase domain-containing protein 14B	metabolic process;regulation of biological process	cytoplasm;cytosol;nucleus	catalytic activity;protein binding			6	25	6	6	1.044	0.99965	0.644	0.00310587		0.512184	0.464128	0.0925756	0.31566	0.48332	0.246032	0.650099	0.662064	0.369014	0.633518	0.574596	0.642213	0.451664	0.447117	0.708497	0.652947	0.63255	0.576251	0.180563	0.196789	0.340762	0.552807	0.409538	0.540789
ABLIM1	Actin-binding LIM protein 1	cell organization and biogenesis	cytoplasm;cytoskeleton	metal ion binding;protein binding			14	6	6	6	0.939	0.955513	1.118	0.948867		0.248461	0.445639	0.284837	0.310769	0.323123	0.412043	0.397532	0.404634	0.35563	0.384227	0.304026	0.251147	0.306566	0.243558	0.501108	0.356002	0	0.259708	0.646584	0.415711	0.68066	0.708897	0.384702	0.718193
ABR	Active breakpoint cluster region-related protein	cell organization and biogenesis;regulation of biological process;response to stimulus	cytosol;membrane	enzyme regulator activity;protein binding			6	6	17	6	1.049	0.99965	1.117	0.972026		0.235032	0.200419	0.237468	0.160097	0.0990016	0	0.223304	0.231984	0.256856	0.224997	0.193811	0.258577	0.253898	0.301125	0.327515	0.22782	0.196491	0.202555	0.154828	0.172804	0.124274	0.250326	0.137834	0.228029
ACAA1	3-ketoacyl-CoA thiolase, peroxisomal	metabolic process;transport	extracellular;membrane;organelle lumen	catalytic activity;protein binding	Valine, leucine and isoleucine degradation; Biosynthesis of unsaturated fatty acids; Peroxisome; Metabolic pathways; PPAR signaling pathway; Fatty acid metabolism; alpha-Linolenic acid metabolism; Fatty acid degradation	PPAR signaling pathway; PPAR Alpha Pathway; Amino Acid metabolism	6	6	17	6	1.923	0.104167	1.294	0.899995		0.141982	0.0732446	0.0523223	0	0.0684834	0	0.00457341	0.0117206	0.00879307	0.011014	0.0225259	0.020576	0.0812678	0.133281	0.0783992	0.0647887	0.131441	0.0827897	0.0413268	0.0564292	0.0341061	0.0249846	0.0328945	0.0680545
ACAA2	3-ketoacyl-CoA thiolase, mitochondrial	cell organization and biogenesis;metabolic process;regulation of biological process;response to stimulus	membrane;mitochondrion;organelle lumen	catalytic activity;protein binding;RNA binding	Fatty acid metabolism; Metabolic pathways; Fatty acid degradation; Valine, leucine and isoleucine degradation; Fatty acid elongation	Fatty Acid Biosynthesis	6	6	6	6	1.032	0.99965	1.241	0.653391		0.809424	0.623707	0.727807	0.423759	0.456209	0.430318	0.411167	0.645322	0.531513	0.428699	0.627649	0.526065	0.684552	0.493108	0.676215	0.545475	0.56845	0.53945	0.0864959	0.117832	0.116326	0.150588	0.173411	0.168817
ACACA	Isoform 4 of Acetyl-CoA carboxylase 1	cell organization and biogenesis;metabolic process;regulation of biological process;response to stimulus;transport	cytoskeleton;cytosol;mitochondrion	catalytic activity;metal ion binding;nucleotide binding;protein binding		Leptin and adiponectin; Mesodermal Commitment Pathway; VEGFA-VEGFR2 Signaling Pathway; Leptin signaling pathway; Fatty Acid Biosynthesis; Focal Adhesion-PI3K-Akt-mTOR-signaling pathway; Sterol Regulatory Element-Binding Proteins (SREBP) signalling; Corticotropin-releasing hormone signaling pathway; AMP-activated Protein Kinase (AMPK) Signaling	25	17	10	6	1.046	0.99965	0.523	0.0799718		0	0.0898796	0	0.0817053	0.0828163	0.0685229	0.0515731	0.0578729	0.0266097	0	0.0756307	0.0681183	0.0446292	0	0	0.0432511	0.0432288	0.0340452	0.0636941	0.0593856	0.0468015	0.0560196	0.014443	0
ACAD9	Acyl-CoA dehydrogenase family member 9, mitochondrial	cell organization and biogenesis;metabolic process	membrane;mitochondrion;nucleus	catalytic activity;nucleotide binding;protein binding			6	6	24	6	1.042	0.99965	0.856	0.5904		0.0776556	0.0893684	0	0.0407858	0.246704	0.0796501	0.250738	0.321328	0.256184	0.162818	0.24705	0.260648	0.150942	0.13523	0.20489	0.131858	0.18304	0.145625	0.192589	0.179151	0.12791	0.185636	0.256907	0.20892
ACADS	Short-chain specific acyl-CoA dehydrogenase, mitochondrial	metabolic process	mitochondrion;nucleus;organelle lumen	catalytic activity;nucleotide binding	Valine, leucine and isoleucine degradation; Fatty acid degradation; Fatty acid metabolism; Carbon metabolism; Metabolic pathways; Butanoate metabolism	Mitochondrial LC-Fatty Acid Beta-Oxidation; Fatty Acid Beta Oxidation	14	3	22	17	0.115	1.0309e-12	1.424	0.753132		0.0306195	0	0.0454076	0	0	0	0.142579	0.0959332	0.195768	0	0.0711637	0.142142	0.0477056	0	0.0968229	0.0433897	0	0.0416395	0.0276039	0.0390496	0.0326821	0	0.0468857	0.0281529
ACADVL	Isoform 3 of Very long-chain specific acyl-CoA dehydrogenase, mitochondrial	cell differentiation;metabolic process;regulation of biological process;response to stimulus	cytosol;membrane;mitochondrion;nucleus;organelle lumen	catalytic activity;nucleotide binding		Mitochondrial LC-Fatty Acid Beta-Oxidation; Fatty Acid Beta Oxidation	6	6	6	6	1.046	0.99965	1.213	0.721016		2.10803	2.42882	2.49929	1.53918	2.13167	2.09696	1.59391	2.11787	1.69337	1.55473	1.92505	1.60884	2.08607	2.05743	2.32044	1.77358	1.88171	1.72651	1.55734	1.70245	1.20571	1.65198	2.0686	2.02229
ACAP2	Arf-GAP with coiled-coil, ANK repeat and PH domain-containing protein 2	regulation of biological process;response to stimulus	endosome;membrane	enzyme regulator activity;metal ion binding;protein binding	Endocytosis		23	14	28	6	0.094	1.58462e-13	0.782	0.719651		0.0135058	0	0	0.0373056	0.0343115	0.0544029	0.0637725	0.072309	0.061568	0.0434475	0.0514365	0.0760887	0.013556	0.0122905	0.00737261	0.0493712	0.00946239	0	0.0456095	0	0.0608267	0.0491884	0.033819	0.0635313
ACAT1	Acetyl-CoA acetyltransferase, mitochondrial	cell organization and biogenesis;metabolic process;response to stimulus	membrane;mitochondrion;organelle lumen	catalytic activity;metal ion binding;protein binding	Butanoate metabolism; Tryptophan metabolism; Terpenoid backbone biosynthesis; Lysine degradation; Fatty acid degradation; Fatty acid metabolism; Glyoxylate and dicarboxylate metabolism; Synthesis and degradation of ketone bodies; Carbon metabolism; Valine, leucine and isoleucine degradation; Metabolic pathways; Pyruvate metabolism; Propanoate metabolism	Synthesis and Degradation of Ketone Bodies; Tryptophan metabolism; Fatty Acid Beta Oxidation	6	6	6	6	0.947	0.940772	1.184	0.846724		1.05584	0.810952	1.23976	0.765144	1.28427	1.30955	1.47909	1.96975	1.72277	1.14336	1.64868	1.27364	1.18952	1.18292	1.77021	1.5288	1.15527	1.43297	1.33477	1.31437	1.45217	1.34657	1.83471	1.60843
ACAT2	Acetyl-CoA acetyltransferase, cytosolic	metabolic process	cytoplasm;cytosol;mitochondrion;nucleus	catalytic activity;protein binding	Valine, leucine and isoleucine degradation; Terpenoid backbone biosynthesis; Propanoate metabolism; Glyoxylate and dicarboxylate metabolism; Pyruvate metabolism; Fat digestion and absorption; Fatty acid metabolism; Carbon metabolism; Tryptophan metabolism; Fatty acid degradation; Metabolic pathways; Butanoate metabolism; Synthesis and degradation of ketone bodies; Lysine degradation		6	6	6	6	1.613	0.0241821	1.256	0.57879		0.855004	1.22553	0.574484	0.687125	0.838222	0.59047	0.517791	0.949171	0.678201	0.565386	0.919447	0.70458	0.78412	1.07581	0.890319	0.909933	1.06342	1.01799	0.60368	1.41741	0.706057	0.660572	1.21825	0.904303
ACBD3	Golgi resident protein GCP60	metabolic process;transport	Golgi;membrane;mitochondrion	protein binding			6	6	6	6	0.971	0.983697	1.146	0.90017		0.40145	0.290964	0.718124	0.658799	0.595007	0.866678	0.614707	0.683404	0.626168	0.576712	0.842757	0.749772	0.621043	0.548501	0.614568	0.270996	0.537112	0.690042	0.474688	0.485246	0.664051	0.856347	0.907669	0.874255
ACIN1	Apoptotic chromatin condensation inducer in the nucleus	cell death;cell differentiation;cell organization and biogenesis;metabolic process;regulation of biological process	cytosol;membrane;nucleus	catalytic activity;protein binding;RNA binding	Spliceosome; mRNA surveillance pathway; RNA transport		6	6	6	6	0.863	0.798965	1.111	0.948867		0.77604	0.591579	0.929437	0.73087	0.656547	0.852449	0.625162	0.533596	0.714479	0.884023	0.700779	0.907233	0.761075	0.579759	0.605394	0.731459	0.575072	0.678248	0.663074	0.785235	0.751535	0.728008	0.668857	0.73947
ACLY	ATP-citrate synthase	metabolic process;regulation of biological process;transport	cytoplasm;cytosol;extracellular;membrane;organelle lumen	catalytic activity;metal ion binding;nucleotide binding;protein binding	Citrate cycle (TCA cycle); Metabolic pathways	Fatty Acid Biosynthesis; TCA Cycle and Deficiency of Pyruvate Dehydrogenase complex (PDHc); Amino Acid metabolism; Sterol Regulatory Element-Binding Proteins (SREBP) signalling	6	6	6	6	1.352	0.269211	0.967	0.883117		6.97049	9.58678	5.87748	11.2376	10.9251	7.71994	5.30061	7.54126	5.33612	9.71719	9.6095	8.15566	5.7993	7.92069	4.17982	5.80262	7.41929	5.92112	5.90184	7.72278	6.00241	7.39193	9.58964	6.9229
ACO1	Cytoplasmic aconitate hydratase	cellular homeostasis;metabolic process;regulation of biological process;response to stimulus;transport	cytoplasm;cytosol;endoplasmic reticulum;Golgi;mitochondrion	catalytic activity;metal ion binding;protein binding;RNA binding	Metabolic pathways; Carbon metabolism; 2-Oxocarboxylic acid metabolism; Citrate cycle (TCA cycle); Glyoxylate and dicarboxylate metabolism; Biosynthesis of amino acids	Iron metabolism in placenta; TCA Cycle and Deficiency of Pyruvate Dehydrogenase complex (PDHc)	6	6	6	3	1.497	0.202648	1.348	0.527327		0.303796	0.29683	0.250686	0.218942	0.265391	0.323583	0.217059	0.502504	0.258725	0.191397	0.32869	0.306948	0.223063	0.273817	0.264894	0.307359	0.495339	0.433558	0.15336	0.302735	0.217557	0.155266	0.423717	0.42993
ACO2	Aconitate hydratase, mitochondrial	metabolic process;response to stimulus	mitochondrion;organelle lumen	catalytic activity;metal ion binding		Amino Acid metabolism; TCA Cycle	6	6	6	6	1.165	0.831879	1.243	0.628661		4.08914	4.45345	3.7357	3.12293	4.956	3.78528	3.68684	5.71316	4.72577	2.96277	4.83662	3.72204	1.64205	2.12429	2.7455	1.19867	2.08032	2.44653	3.84321	5.32598	4.24468	3.03336	4.88228	3.84908
ACOT2	Acyl-coenzyme A thioesterase 2, mitochondrial	metabolic process	mitochondrion;organelle lumen	catalytic activity;protein binding	Ovarian steroidogenesis; Metabolic pathways; Fatty acid elongation; Biosynthesis of unsaturated fatty acids		3	6	3	6	1.356	0.270634	0.964	0.816119		1.51089	2.12083	1.03588	0.892751	1.78532	0.881618	1.65914	2.11174	1.39566	1.11777	1.88578	0.981392	0.950275	1.81129	1.16785	0.746881	1.64491	0.678922	0.941021	1.12245	0.684787	0.58959	1.40728	0.70936
ACOT7	Cytosolic acyl coenzyme A thioester hydrolase	metabolic process	cytoplasm;cytosol;mitochondrion	catalytic activity;protein binding	Fatty acid elongation; Biosynthesis of unsaturated fatty acids		6	6	6	6	1.386	0.241833	1.041	0.977301		0.581047	0.913316	0.613906	0.644275	0.850842	0.580513	0.78113	0.752436	0.817245	0.837052	0.991775	0.699241	0.985375	1.43124	0.97698	0.632737	0.964112	0.812973	0.652615	1.06052	0.744015	0.642984	0.797081	0.640338
ACOT9	Isoform 4 of Acyl-coenzyme A thioesterase 9, mitochondrial	metabolic process	mitochondrion;organelle lumen	catalytic activity			11	10	5	6	11.965	8.91795e-17	0.096	1.00949e-16		0	0.238738	0	0	0	0	0.26051	0.265679	0.25812	0.267395	0.297194	0.391148	0.0420512	0.279819	0	0	0.153709	0	0	0.146906	0	0.0856206	0.193217	0.148461
ACP1	Low molecular weight phosphotyrosine protein phosphatase	metabolic process	cytoplasm;cytosol;membrane	catalytic activity;protein binding	Thiamine metabolism; Adherens junction; Metabolic pathways	VEGFA-VEGFR2 Signaling Pathway	6	6	6	6	0.957	0.949887	1.062	0.991487		1.46613	1.28426	1.35198	1.75579	1.47256	1.65711	1.74116	1.35285	1.74109	1.43129	1.49713	1.77865	0.980621	1.07236	0.906152	1.15671	1.03716	1.36677	1.24563	1.24882	1.10965	1.49712	1.13949	1.31675
ACP2	Lysosomal acid phosphatase	cell organization and biogenesis;metabolic process	membrane;organelle lumen;vacuole	catalytic activity	Lysosome		6	6	6	6	0.934	0.94745	0.967	0.883117		0.767438	0.64181	0.748305	0.350685	0.43002	0.437453	0.520157	0.353261	0.365967	0.345358	0.118015	0.302624	0.133922	0.441865	0.621057	0.483224	0.489235	0.48875	0.265675	0.323539	0.241948	0.222795	0.20334	0.143759
ACSL3	Long-chain-fatty-acid--CoA ligase 3	cell organization and biogenesis;metabolic process;regulation of biological process;response to stimulus;transport	endoplasmic reticulum;Golgi;membrane;mitochondrion	catalytic activity;nucleotide binding;protein binding	Peroxisome; Adipocytokine signaling pathway; PPAR signaling pathway; Metabolic pathways; Fatty acid degradation; Fatty acid metabolism; Fatty acid biosynthesis	PPAR signaling pathway; Fatty Acid Biosynthesis; Mitochondrial LC-Fatty Acid Beta-Oxidation; Fatty Acid Beta Oxidation	6	6	6	6	1.194	0.823433	1.237	0.742131		0.127417	0.488404	0.512979	0.375932	0.548762	0.461809	0.401886	0.489918	0.432315	0.471834	0.496094	0.443418	0.0862114	0.430654	0.27078	0.274985	0.341667	0.314211	0.434424	0.483175	0.38043	0.374911	0.434453	0.295644
ACSS2	Isoform 2 of Acetyl-coenzyme A synthetase, cytoplasmic	cell organization and biogenesis;metabolic process	cytoplasm;cytosol;organelle lumen	catalytic activity;nucleotide binding		Amino acid conjugation of benzoic acid; Fatty Acid Beta Oxidation; Fatty Acid Biosynthesis	6	18	13	6	1.819	0.142494	0.903	0.816977		0.0471603	0.0127126	0	0	0.00855589	0	0.0719339	0.118465	0.0542783	0.0744896	0.0640544	0.099176	0.0834334	0.326458	0.0844755	0.306255	0.120966	0.105968	0.0191916	0.0361868	0.0224606	0	0.0567581	0.0588078
ACTA2	Actin, aortic smooth muscle	regulation of biological process;response to stimulus	cytoplasm;cytoskeleton;cytosol	nucleotide binding;protein binding	Vascular smooth muscle contraction	Myometrial Relaxation and Contraction Pathways; Striated Muscle Contraction	6	6	6	6	1.371	0.226663	0.806	0.202528		2044.25	3015.76	1638.12	2697.09	3844.69	1432.08	2543.47	2324.5	2214.41	3036.49	2905.09	2065.24	2525.82	3473.65	1423.75	2447.16	3184.11	2366.84	3109.31	3772.33	2778.01	2722.95	3171.24	1954.72
ACTB	Actin, cytoplasmic 1	cell organization and biogenesis;cellular component movement;metabolic process;regulation of biological process;response to stimulus	cytoplasm;cytoskeleton;cytosol;membrane;nucleus	DNA binding;nucleotide binding;protein binding;structural molecule activity	Arrhythmogenic right ventricular cardiomyopathy (ARVC); Proteoglycans in cancer; Platelet activation; Phagosome; Viral myocarditis; Rap1 signaling pathway; Gastric acid secretion; Pathogenic Escherichia coli infection; Adherens junction; Shigellosis; Focal adhesion; Influenza A; Thyroid hormone signaling pathway; Bacterial invasion of epithelial cells; Hippo signaling pathway; Regulation of actin…	Myometrial Relaxation and Contraction Pathways; Common Pathways Underlying Drug Addiction; Arrhythmogenic Right Ventricular Cardiomyopathy; Focal Adhesion; Regulation of Actin Cytoskeleton; Pathogenic Escherichia coli infection; Fas Ligand (FasL) pathway and Stress induction of Heat Shock Proteins (HSP) regulation	6	6	6	6	1.099	0.954157	0.93	0.774641		636.886	848.805	572.501	770.238	1019.06	492.871	620.067	568.624	602.429	759.877	732.668	618.152	780.473	961.818	542.61	867.689	902.588	697.048	609.967	688.369	557.011	666.229	672.274	518.019
ACTBL2	Beta-actin-like protein 2		cytoplasm;cytoskeleton	nucleotide binding;protein binding			15	22	12	15	0.01	8.91795e-17	0.618	0.00659572		0	0	0.389514	0.597431	0	0	0.191788	0	0.0923753	0.14399	0	0	0.522179	0	0	0.380245	0	0	0.280309	0	0.202751	0	0	0
ACTL6A	Actin-like protein 6A	cell organization and biogenesis;metabolic process;regulation of biological process;response to stimulus	membrane;nucleus	DNA binding;protein binding		Gastric Cancer Network 1	6	6	25	6	1.161	0.940895	1.439	0.547939		0.04015	0.0642572	0.114485	0.12433	0.0996847	0.146753	0.11834	0.116296	0.0924128	0.0621732	0.0823053	0.188595	0.059153	0.0796282	0.140963	0.0792589	0.0963561	0.138073	0.129147	0.124961	0.149898	0.202896	0.247755	0.212359
ACTN1	Alpha-actinin-1 (Fragment)			protein binding			9	6	10	6	1.037	0.99965	1.106	0.990978		0.0162994	0.302691	0.202217	0.353482	0.399701	0.16117	0.0444714	0.323151	0.297693	0.342719	0.356977	0.326627	0.0620455	0.0716369	0.059725	0.260608	0	0.271864	0.0421366	0.333431	0.315265	0.349558	0.382118	0.317949
ACTN4	Alpha-actinin-4	cell organization and biogenesis;cellular component movement;regulation of biological process;response to stimulus;transport	cytoplasm;cytoskeleton;cytosol;extracellular;nucleus;organelle lumen	DNA binding;metal ion binding;protein binding;RNA binding	Amoebiasis; Regulation of actin cytoskeleton; Tight junction; Viral carcinogenesis; Systemic lupus erythematosus; Adherens junction; Arrhythmogenic right ventricular cardiomyopathy (ARVC); Leukocyte transendothelial migration; Focal adhesion	Primary Focal Segmental Glomerulosclerosis FSGS; Striated Muscle Contraction; Arrhythmogenic Right Ventricular Cardiomyopathy	6	6	6	6	1.211	0.700085	0.925	0.757795		111.842	144.242	109.916	150.691	175.749	90.818	161.957	151.023	134.433	174.863	159.413	132.032	172.234	214.65	131.314	159.888	202.527	162.131	162.303	174.579	148.966	164.069	160.261	124.861
ACTR1A	Alpha-centractin	regulation of biological process;transport	cytoplasm;cytoskeleton;cytosol	nucleotide binding;protein binding			6	6	6	6	1.016	0.99965	0.928	0.721265		4.01037	4.08621	3.54388	4.44747	4.0486	3.78317	3.7342	3.72893	3.37308	3.64555	3.55034	3.67184	2.648	2.84256	2.25349	2.63119	2.56906	2.25768	2.97741	5.4497	5.2139	3.52502	5.1949	5.51135
ACTR3	Actin-related protein 3	cell division;cell organization and biogenesis;cellular component movement;regulation of biological process;response to stimulus	cytoplasm;cytoskeleton;cytosol;membrane	nucleotide binding;protein binding;structural molecule activity		Association Between Physico-Chemical Features and Toxicity Associated Pathways	6	6	6	6	1.056	0.998247	1.022	0.970006		11.9554	10.9036	11.8545	13.6241	15.7334	11.5951	15.1074	14.4775	14.0815	13.474	14.5099	14.5965	14.3381	15.3292	11.7085	12.7201	13.2953	13.0687	14.6298	12.324	15.0619	13.1358	13.4803	12.4858
ADAM10	Disintegrin and metalloproteinase domain-containing protein 10	cell communication;cell organization and biogenesis;metabolic process;regulation of biological process;response to stimulus;transport	cell surface;cytoplasm;Golgi;membrane;nucleus;organelle lumen	catalytic activity;metal ion binding;protein binding	Epithelial cell signaling in Helicobacter pylori infection; Alzheimer's disease	Copper homeostasis; Hypertrophy Model; Canonical and Non-canonical Notch signaling; Alzheimers Disease	4	0	17	3	1.424	0.343551	1.236	0.814931		0.213105	0.262334	0.248833	0	0.0762527	0	0.214548	0.439317	0.22053	0.0807021	0	0.362165	0.067279	0.207472	0.208353	0	0.120088	0	0	0	0	0	0	0
ADAM9	Disintegrin and metalloproteinase domain-containing protein 9	cell differentiation;cellular component movement;metabolic process;regulation of biological process;response to stimulus	cell surface;extracellular;membrane	catalytic activity;metal ion binding;protein binding		Copper homeostasis	28	28	28	6	1.679	0.247425	100	1.00949e-16		0	0	0.0280705	0.0443728	0.0432193	0.0395741	0.0469723	0.0751402	0.0391547	0.0426036	0.054666	0.0510993	0	0	0.0213987	0.042016	0.0391339	0.035068	0	0	0.0379649	0.067628	0.0587301	0.0609855
ADAR	Double-stranded RNA-specific adenosine deaminase	cell differentiation;cell organization and biogenesis;defense response;metabolic process;regulation of biological process;response to stimulus	cytoplasm;membrane;nucleus;spliceosomal complex	catalytic activity;DNA binding;metal ion binding;protein binding;RNA binding			6	6	6	25	0.991	0.99965	1.173	0.953239		0.0458414	0.0264743	0.0320692	0.0271622	0.0235761	0.0452945	0.0329327	0.0368068	0.0421188	0.0383763	0.067484	0.0966156	0.0487165	0.0481185	0.0569555	0.0323812	0.112228	0.109522	0.0268396	0.0276439	0.0470198	0.0376916	0.082544	0.0667818
ADD1	Isoform 3 of Alpha-adducin	cell differentiation;cell organization and biogenesis;cellular homeostasis;metabolic process;regulation of biological process;response to stimulus;transport	cytoplasm;cytosol;membrane;nucleus	protein binding;RNA binding;structural molecule activity			6	6	6	6	0.829	0.45482	1.568	0.0181101		5.59439	4.5276	8.89106	4.07286	3.19668	8.11592	5.35245	5.52001	7.96955	5.80162	4.66356	8.42865	7.25862	4.73518	11.1325	9.77047	6.16638	11.9	6.20131	5.4044	7.15364	7.76784	3.86498	10.2566
ADD3	Isoform 1 of Gamma-adducin	cell organization and biogenesis;transport	chromosome;cytoskeleton;cytosol;membrane	protein binding;structural molecule activity			6	6	17	6	0.853	0.554171	1.498	0.0486993		4.13721	3.33953	5.4	2.13592	1.275	3.49646	2.69465	2.58052	4.44182	2.67944	2.24079	4.26833	3.1563	2.27155	5.18554	4.14259	2.21562	4.5105	3.28497	2.84995	3.64103	3.87553	2.20709	5.96885
ADH1B	Alcohol dehydrogenase 1B	metabolic process	cytoplasm;cytosol;membrane	catalytic activity;metal ion binding	Tyrosine metabolism; Glycolysis / Gluconeogenesis; Metabolism of xenobiotics by cytochrome P450; Metabolic pathways; Retinol metabolism; Drug metabolism - cytochrome P450; Fatty acid degradation; Chemical carcinogenesis	Fatty Acid Omega Oxidation	10	10	3	10	5.799	8.91795e-17	1.818	0.000285796		5.96208	29.5998	11.1245	7.20234	14.2014	12.7096	14.8453	103.834	23.2426	44.1115	82.2147	69.1034	20.4516	71.3773	45.2278	87.8393	133.174	82.8676	9.03249	61.6002	14.2576	42.981	61.2064	64.5586
ADH5	Alcohol dehydrogenase class-3	metabolic process;response to stimulus	cytoplasm;cytosol;mitochondrion	catalytic activity;metal ion binding;protein binding	Glycolysis / Gluconeogenesis; Retinol metabolism; Tyrosine metabolism; Chemical carcinogenesis; Metabolism of xenobiotics by cytochrome P450; Fatty acid degradation; Metabolic pathways; Drug metabolism - cytochrome P450; Carbon metabolism	Folate-Alcohol and Cancer Pathway; Amino Acid metabolism	6	6	6	6	1.269	0.505781	1.057	0.994076		2.51747	2.92295	2.11802	2.74318	3.05944	2.63481	3.40333	4.00604	3.33063	3.57384	3.9907	3.79627	2.54681	3.09074	2.39972	3.08274	3.61417	2.95801	3.44732	3.89623	2.78681	3.56911	3.54196	3.86191
ADIRF	Adipogenesis regulatory factor	cell differentiation;metabolic process;regulation of biological process;response to stimulus	cytosol;nucleus				6	17	17	17	0.666	0.00713307	0.895	0.601463		4.58629	2.3323	3.28055	1.09946	0.478613	1.34955	3.04158	2.01335	3.54931	1.46606	0.92399	1.75286	2.95396	2.44635	1.38342	1.99279	1.15858	1.81745	3.59166	1.47851	2.78039	1.53819	0.6857	1.46513
ADK	Adenosine kinase	metabolic process	cytoplasm;cytosol;nucleus	catalytic activity;metal ion binding;nucleotide binding;RNA binding	Metabolic pathways; Purine metabolism		6	6	6	6	0.757	0.139318	0.812	0.185029		4.91235	3.44034	3.88611	3.42494	2.6391	3.22519	3.04189	2.66874	2.66016	2.70415	1.9416	2.17598	2.22091	1.67533	2.04497	1.65823	1.33942	1.742	3.39679	2.66835	2.85324	2.49754	1.55515	2.20044
ADNP	Activity-dependent neuroprotector homeobox protein	cell communication;metabolic process;regulation of biological process;response to stimulus	cytoplasm;nucleus	DNA binding;metal ion binding;protein binding			0	0	0	11	100	8.91795e-17				0	0	0	0	0	0	0	0.0256999	0	0	0.0291317	0	0	0	0	0	0	0	0	0	0	0	0	0
ADPRHL2	Poly(ADP-ribose) glycohydrolase ARH3	response to stimulus	cytoplasm;mitochondrion;nucleus;organelle lumen	catalytic activity;metal ion binding			6	25	6	6	0.743	0.339647	1.007	0.948867		0.119774	0.0738562	0.111008	0.149184	0.129699	0.151207	0.16807	0.158915	0	0.183455	0.15214	0.194011	0.155828	0.141583	0.167753	0.200199	0.14054	0.211394	0.222799	0	0.213358	0.277725	0.211654	0.278371
ADRA2A	Alpha-2A adrenergic receptor	cell organization and biogenesis;cellular component movement;regulation of biological process;response to stimulus;transport	cytoplasm;membrane	protein binding;receptor activity;signal transducer activity	cGMP-PKG signaling pathway; Neuroactive ligand-receptor interaction	Monoamine GPCRs; GPCRs, Class A Rhodopsin-like	25	28	25	25	2.018	0.00225271	2.157	5.31181e-06		0.171813	0.411053	0.436948	0.787559	0.384203	0.801624	0.0313261	0.53453	0.572411	0.94489	0.919944	0.759908	0.38841	0.604623	0.63177	1.71281	1.38887	1.44389	0.193604	0.566425	0.698142	1.93905	1.78164	2.12579
ADRM1	Proteasomal ubiquitin receptor ADRM1	cell organization and biogenesis;metabolic process;regulation of biological process	cytoplasm;cytosol;membrane;nucleus;proteasome	enzyme regulator activity;protein binding			6	6	6	6	0.935	0.951081	0.891	0.691999		0.459398	0.356229	0.287526	0.368864	0.315982	0.353909	0.283239	0.247185	0.283873	0.383652	0.297367	0.306705	0.416876	0.425893	0.41241	0.335414	0.345782	0.346203	0.375249	0.395513	0.271402	0.308143	0.280222	0.253402
ADSS	Adenylosuccinate synthetase isozyme 2	metabolic process;response to stimulus	cytoplasm;cytosol;membrane	catalytic activity;metal ion binding;nucleotide binding;protein binding	Metabolic pathways; Alanine, aspartate and glutamate metabolism; Purine metabolism	Nucleotide Metabolism	6	6	6	6	0.985	0.985438	1.265	0.620966		0.351473	0.268152	0.395821	0.456555	0.360766	0.37294	0.315888	0.353654	0.346585	0.516533	0.476955	0.497639	0.338678	0.374838	0.368344	0.299513	0.354268	0.383728	0.248635	0.258786	0.30197	0.271466	0.250466	0.310656
AFAP1	Isoform 2 of Actin filament-associated protein 1	regulation of biological process	cytoskeleton;cytosol	protein binding			6	6	6	6	7.995	8.91795e-17	6.195	1.00949e-16		0.21724	0.746808	0.997767	1.12557	1.18172	0.480076	0.0762369	1.16574	0.870278	1.08595	1.11214	1.03134	0.0450437	0.735394	0.605769	1.10524	0.808796	0.702548	0.242647	3.52679	2.13939	2.1233	2.66083	1.96042
AGFG1	Isoform 4 of Arf-GAP domain and FG repeat-containing protein 1	cell organization and biogenesis;development;regulation of biological process;transport	cytosol	DNA binding;enzyme regulator activity;metal ion binding;protein binding;RNA binding			6	6	6	6	1.554	0.172613	1.292	0.6998		0.301809	0.434582	0.334907	0.278815	0.430667	0.476986	0.18069	0.373966	0.26531	0.22604	0.330417	0.317056	0.170347	0.289904	0.210826	0.216452	0.248407	0.24467	0.549288	0.597972	0.400494	0.399627	0.539563	0.430411
AGL	Glycogen debranching enzyme	metabolic process;response to stimulus;transport	cytoplasm;cytosol;endoplasmic reticulum;extracellular;nucleus;organelle lumen	catalytic activity;protein binding	Metabolic pathways; Starch and sucrose metabolism	Glycogen Metabolism	6	6	6	6	1.092	0.971974	0.958	0.881819		0.311914	0.29136	0.310023	0.372452	0.330627	0.166089	0.547213	0.462519	0.387106	0.508084	0.423692	0.269309	0.634388	0.740625	0.524719	0.399768	0.532847	0.47389	0.271753	0.307361	0.214259	0.242544	0.297081	0.255378
AGO2	Protein argonaute-2	cell organization and biogenesis;metabolic process;regulation of biological process;response to stimulus	cytoplasm;cytosol;membrane;nucleus	catalytic activity;DNA binding;metal ion binding;protein binding;RNA binding			6	1	1	6	1.182	0.867441	1.443	0.371026		0.0513443	0.906568	0.109267	0.107746	0.0194326	0.113187	0.260407	0.290307	0.263888	0.227424	0.264798	0.222198	0.160027	0.153569	0.17767	0.129611	0.116389	0.163615	0.164798	0.923265	0.25164	0.28067	0.146326	0.28707
AGPS	Alkyldihydroxyacetonephosphate synthase, peroxisomal	metabolic process	membrane;mitochondrion;organelle lumen	catalytic activity;nucleotide binding;protein binding	Ether lipid metabolism; Metabolic pathways; Peroxisome	Triacylglyceride Synthesis	3	3	1	3	1.341	0.701001	0.974	0.957971		0.0263613	0.129268	0.0186407	0	0	0.0109898	0.0254	0.126694	0.0328662	0.0510746	0.0577448	0.0475876	0.0570244	0.0913106	0.0417888	0.0273253	0.0769	0.0409287	0.03572	0.118198	0.0373025	0.0172254	0.037251	0.0381903
AHCY	Adenosylhomocysteinase	defense response;metabolic process;response to stimulus;transport	cytoplasm;cytosol;nucleus	catalytic activity;nucleotide binding;protein binding	Metabolic pathways; Cysteine and methionine metabolism	Trans-sulfuration pathway; Folate Metabolism; Trans-sulfuration and one carbon metabolism; One Carbon Metabolism	6	6	6	6	1.089	0.973438	1.003	0.948867		8.68553	8.95483	8.03458	9.73155	10.3228	8.97845	10.3011	10.7528	9.95167	10.8556	11.1572	9.51905	9.29015	10.0324	7.12041	9.12238	8.9504	9.6961	7.55026	8.57689	7.71414	9.50367	9.42561	9.22727
AHCYL1	Putative adenosylhomocysteinase 2	metabolic process;regulation of biological process;response to stimulus;transport	cytoplasm;cytosol;endoplasmic reticulum;membrane	catalytic activity;nucleotide binding;protein binding;RNA binding	Cysteine and methionine metabolism; Metabolic pathways	Trans-sulfuration and one carbon metabolism; One carbon metabolism and related pathways	6	6	6	6	1.048	0.99965	0.962	0.873177		4.56579	5.49095	4.77751	5.02577	5.35025	3.30093	4.8796	4.82244	4.7458	5.57651	4.6086	4.99076	4.8401	4.58699	2.46543	5.48614	4.65245	5.42623	5.00039	4.13437	4.16981	5.12136	3.96972	5.35031
AHNAK	Neuroblast differentiation-associated protein AHNAK	cell organization and biogenesis;regulation of biological process	cytoplasm;cytoskeleton;cytosol;membrane;nucleus	protein binding;RNA binding;structural molecule activity			6	6	6	6	0.888	0.733075	1.075	0.981627		572.855	411.602	552.277	490.525	404.657	460.139	467.93	494.019	475.265	537.024	461.681	504.29	525.355	411.567	489.289	557.394	437.971	578.886	480.265	484.288	467.35	602.212	419.053	589.473
AHNAK2	Protein AHNAK2	cell organization and biogenesis	cytoplasm;cytosol;membrane;nucleus	protein binding			6	6	6	6	0.875	0.68678	0.959	0.873177		8.10533	5.7582	6.47929	6.74604	5.44712	4.00716	7.53285	6.05966	7.9079	7.46489	6.20332	4.14032	8.12839	7.26179	4.30165	8.81157	10.6568	8.68876	11.7773	12.9124	10.984	15.1351	10.8284	11.1561
AHR	Aryl hydrocarbon receptor	cell death;metabolic process;regulation of biological process;response to stimulus	cytoplasm;cytosol;nucleus	DNA binding;protein binding;receptor activity;signal transducer activity		Integrated Breast Cancer Pathway; Adipogenesis; Aryl Hydrocarbon Receptor Pathway; Aryl Hydrocarbon Receptor; Development and heterogeneity of the ILC family	17	6	6	6	0.972	0.977999	1.091	0.988545		0.152583	0.28655	0.275393	0.322881	0.127755	0.176266	0.31313	0.34326	0.368648	0.253332	0.11576	0.364959	0.201387	0.142337	0.255787	0	0.0846229	0.132009	0.31836	0.23729	0.248125	0.314307	0.260102	0.425235
AHSA1	Activator of 90 kDa heat shock protein ATPase homolog 1	regulation of biological process;response to stimulus	cytoplasm;cytosol;endoplasmic reticulum	enzyme regulator activity;protein binding		T-Cell antigen Receptor (TCR) pathway during Staphylococcus aureus infection	6	6	6	6	0.912	0.890735	1.075	0.998304		1.20347	0.997563	0.788127	1.30959	1.05688	1.21359	1.07399	0.807186	0.942573	1.27762	1.14996	1.31497	0.835624	0.847902	0.660374	0.923643	0.840475	1.03422	1.35164	1.1466	0.906363	1.39157	1.11121	1.17023
AHSG	Alpha-2-HS-glycoprotein	defense response;metabolic process;regulation of biological process;response to stimulus;transport	extracellular;Golgi;organelle lumen	enzyme regulator activity			14	6	16	6	0.473	9.57933e-07	1.671	0.0036089		18.5689	8.73738	51.6148	24.6918	27.1453	160.342	35.225	20.2244	44.7381	23.4184	20.2203	27.2712	53.9669	12.0117	98.5899	88.3687	51.099	88.0469	28.541	14.6753	36.9831	22.6251	14.1699	22.0698
AIFM1	Apoptosis-inducing factor 1, mitochondrial	cell death;cell differentiation;cell organization and biogenesis;cellular homeostasis;metabolic process;regulation of biological process;response to stimulus	cytoplasm;cytosol;membrane;mitochondrion;nucleus	catalytic activity;DNA binding;nucleotide binding;protein binding	Apoptosis	Apoptosis Modulation and Signaling; Nanomaterial induced apoptosis; Apoptosis Modulation by HSP70	6	6	6	6	1.155	0.85939	1.192	0.814414		0.824909	0.747192	1.52889	0.984693	1.01845	1.40166	0.870542	1.07209	1.0285	1.12664	1.2994	0.931768	0.794808	0.90591	1.07391	0.995666	1.01253	0.862772	0.845133	1.24209	1.36733	0.847343	1.51199	1.07378
AIMP1	Isoform 2 of Aminoacyl tRNA synthase complex-interacting multifunctional protein 1	cell communication;cell death;cellular component movement;defense response;metabolic process;regulation of biological process;response to stimulus	cell surface;cytosol;endoplasmic reticulum;Golgi;membrane;nucleus	protein binding;RNA binding			6	6	6	6	0.957	0.940772	1.096	0.970006		2.62714	2.40249	2.49476	2.56328	2.37279	2.35865	2.04913	1.9339	2.00526	2.43319	2.30906	2.2666	2.31967	2.16823	3.02044	1.99103	2.17223	2.41429	2.16051	2.1501	1.93215	1.75599	1.85733	1.81706
AIP	AH receptor-interacting protein	metabolic process;regulation of biological process;response to stimulus;transport	cytoplasm;cytosol;membrane	protein binding;signal transducer activity		Aryl Hydrocarbon Receptor; Aryl Hydrocarbon Receptor Pathway	6	6	6	6	0.848	0.765474	1.251	0.58624		0.659085	0.430386	0.616359	0.615389	0.285706	0.600823	0.596313	0.686901	0.763955	0.598156	0.507336	0.767303	0.398326	0.417176	0.606251	0.482149	0.452811	0.545033	0.37686	0.328822	0.723872	0.37998	0.670281	0.555404
AK1	Adenylate kinase isoenzyme 1	metabolic process;regulation of biological process	cytoplasm;cytosol;membrane	catalytic activity;nucleotide binding			6	6	6	6	0.716	0.0685031	1.113	0.948867		7.77417	6.38295	6.85057	3.6448	4.01135	4.8563	7.32727	4.75743	8.29711	6.10232	3.76925	5.95394	6.62006	4.4153	6.86392	7.56405	7.44154	7.87378	8.23114	4.92345	7.24563	7.06024	4.14124	7.35948
AK2	Adenylate kinase 2, mitochondrial	metabolic process	membrane;mitochondrion	catalytic activity;nucleotide binding	Purine metabolism; Thiamine metabolism; Metabolic pathways		17	6	17	6	1.016	0.999882	1.101	0.972026		0.63654	0.294544	0.589541	0.241742	0.317477	0.382312	0.349882	0.448694	0.361301	0.268716	0.540564	0.342209	0.609784	0.466574	0.731632	0.2764	0.346532	0.290685	0.296985	0.224079	0.19221	0.166842	0.214588	0.163912
AK3	GTP:AMP phosphotransferase AK3, mitochondrial	coagulation;metabolic process	mitochondrion;organelle lumen	catalytic activity;nucleotide binding;protein binding	Purine metabolism		6	6	6	6	1.053	0.989925	1.382	0.204088		1.09229	0.563166	1.00028	0.929911	0.968936	1.69355	1.11296	1.68624	1.19906	0.588096	1.7689	1.42546	1.03795	1.0351	1.66077	0.983017	1.48319	1.20692	0.709228	0.997516	0.886162	0.395067	1.13682	1.34283
AK4	Adenylate kinase 4, mitochondrial	metabolic process;response to stimulus	mitochondrion;organelle lumen	catalytic activity;nucleotide binding	Thiamine metabolism; Metabolic pathways; Purine metabolism		6	6	6	6	1.26	0.629937	0.899	0.578788		0.44766	0.577754	0.470508	0.707844	0.79356	0.40557	0.873136	0.803962	0.699449	0.743873	0.632552	0.435222	0.542454	0.87388	0.445575	0.468658	0.647588	0.390348	0.695633	0.76301	0.529493	0.728281	0.549797	0.37876
AKAP12	A-kinase anchor protein 12	regulation of biological process;response to stimulus;transport	cytoplasm;cytoskeleton;cytosol;membrane	protein binding		G Protein Signaling Pathways	6	6	17	6	0.776	0.226075	1.133	0.928229		8.61151	6.26523	9.11494	2.74009	3.39533	3.31477	9.79675	8.20174	10.2052	5.07082	5.70856	6.94251	11.9078	8.94071	11.752	11.6305	9.56651	12.8879	10.3169	8.25292	11.3449	8.34834	4.56722	10.2188
AKAP2	Isoform 4 of A-kinase anchor protein 2	regulation of biological process	membrane			G Protein Signaling Pathways	6	3	3	6	1.48	0.0746054	1.094	0.962696		19.5784	24.3144	13.3629	11.2889	15.3986	7.36345	12.4043	18.009	12.9516	11.3276	11.6371	9.37006	12.723	17.7728	11.4699	10.3667	18.9573	10.512	10.8146	19.9348	12.2191	9.48554	8.20085	7.11524
AKAP8L	A-kinase anchor protein 8-like	cell organization and biogenesis;metabolic process;regulation of biological process	chromosome;cytoplasm;nucleus	DNA binding;metal ion binding;protein binding;RNA binding	Epstein-Barr virus infection		0	0	19	6	0.553	0.230878	13.221	1.00949e-16		0	0	0.026515	0	0	0.0279617	0.0534326	0.01899	0.0299847	0.0254741	0.0526467	0.0540701	0	0	0	0	0	0	0	0	0	0	0	0
AKR1A1	Alcohol dehydrogenase [NADP(+)]	metabolic process	cytosol;membrane	catalytic activity;protein binding	Glycolysis / Gluconeogenesis; Pentose and glucuronate interconversions; Metabolic pathways; Glycerolipid metabolism	Metapathway biotransformation; Benzo(a)pyrene metabolism	6	6	6	6	1.078	0.979508	1.215	0.74395		4.15072	3.05119	3.20136	2.72744	2.4995	2.90869	3.14164	3.74456	3.51265	3.02346	3.13914	3.63032	3.23048	3.38417	3.72089	3.39118	3.39514	3.85215	2.64896	2.84201	2.96115	2.8007	2.71643	3.52746
AKR1B1	Aldose reductase	metabolic process;regulation of biological process;response to stimulus	cytoplasm;cytosol;extracellular;vacuole	catalytic activity;protein binding	Galactose metabolism; Fructose and mannose metabolism; Metabolic pathways; Glycerolipid metabolism; Pentose and glucuronate interconversions	Polyol Pathway; Metapathway biotransformation	6	6	6	6	1.144	0.888961	1.165	0.866982		4.48854	5.78984	4.05823	2.93908	3.56774	3.92561	4.96704	6.89384	5.55013	2.6286	3.45221	3.80012	3.71771	4.98337	4.34514	3.7011	3.89154	4.68654	3.17006	4.33823	3.4228	2.96492	2.89901	3.77396
AKR1C2	Aldo-keto reductase family 1 member C2	cell differentiation;metabolic process;regulation of biological process;response to stimulus	cytoplasm	catalytic activity	Chemical carcinogenesis; Steroid hormone biosynthesis	Metapathway biotransformation; Benzo(a)pyrene metabolism	6	6	17	6	0.793	0.290222	1.352	0.271935		6.4733	3.93559	5.96209	2.68037	1.56081	4.10176	5.27414	4.64995	5.74214	3.84305	2.17012	6.10854	2.51411	1.7011	4.74441	3.70907	2.56411	4.50229	3.42126	4.30108	5.17111	5.15387	2.86066	8.41936
AKR1C3	Aldo-keto reductase family 1 member C3	cell communication;cell differentiation;metabolic process;regulation of biological process;response to stimulus;transport	cytoplasm;cytosol;nucleus	catalytic activity	Ovarian steroidogenesis; Arachidonic acid metabolism; Metabolic pathways; Steroid hormone biosynthesis	Benzo(a)pyrene metabolism; Metapathway biotransformation	6	6	6	6	0.682	0.0327277	1.633	0.0066247		3.1338	2.07902	2.99147	1.81361	1.25742	2.7262	2.63525	3.24592	3.93925	1.44548	1.34261	2.56366	1.86468	1.33728	2.71015	2.54563	1.308	2.95989	1.16168	0.897529	1.69137	1.32326	0.735381	2.16554
AKR7A2	Aflatoxin B1 aldehyde reductase member 2	metabolic process	cytoplasm;cytosol;Golgi	catalytic activity;protein binding	Metabolism of xenobiotics by cytochrome P450	Aflatoxin B1 metabolism; Metapathway biotransformation	6	6	6	6	1.097	0.944685	1.087	0.984475		1.26267	1.73486	1.254	1.56604	0.939347	1.46132	1.68703	1.25097	1.25888	0.893126	1.12894	1.06603	0.617466	0.402658	0.348013	0.344468	1.02013	0.382179	0.909716	1.10185	0.99014	1.94098	1.16557	1.01758
ALAD	Isoform 2 of Delta-aminolevulinic acid dehydratase	cell organization and biogenesis;metabolic process;regulation of biological process;response to stimulus;transport	cytosol;extracellular;nucleus;organelle lumen	catalytic activity;metal ion binding;protein binding		Heme Biosynthesis	28	6	21	23	1.182	0.904712	1.17	0.93298		0.0312535	0.012695	0	0.837118	0.0116944	0.0483982	0.285925	0.455155	0.680426	1.59129	0.621539	0.623195	0.0158449	0.107807	0.0844308	0.572638	0.804902	0.767348	0.174415	0.332787	0.354888	0.226865	0.531449	0.716241
ALB	Serum albumin	cell communication;cell organization and biogenesis;metabolic process;regulation of biological process;response to stimulus;transport	cytoplasm;endoplasmic reticulum;extracellular;Golgi;nucleus;organelle lumen	antioxidant activity;catalytic activity;DNA binding;metal ion binding;protein binding	Thyroid hormone synthesis	Vitamin B12 Metabolism; Selenium Micronutrient Network; Folate Metabolism	6	6	18	6	0.567	0.00034326	0.99	0.940131		71.0086	42.0728	59.6734	53.7785	71.8543	250.622	98.9775	47.4601	105.219	66.9637	54.0133	68.7146	226.26	54.7868	150.372	181.866	124.692	235.031	61.7301	52.5084	88.6775	54.8796	36.5104	63.5458
ALCAM	CD166 antigen	cell growth;cellular component movement;regulation of biological process;response to stimulus	extracellular;membrane	protein binding	Cell adhesion molecules (CAMs)		6	10	10	6	1.975	0.00298613	1.331	0.44507		0.442884	0.667264	0.455684	0.685948	1.29496	0.619473	0.258648	0.725114	0.316806	0.659764	0.737875	0.620236	0.300574	0.620551	0.419725	0.708235	0.753691	0.64963	0.0945409	0.576147	0.175315	0.65709	0.796129	0.668322
ALDH16A1	Aldehyde dehydrogenase family 16 member A1	metabolic process	membrane	catalytic activity			6	6	17	3	1.17	0.862375	1.101	0.962831		0.63561	0.647862	0.550538	0.0712922	0.293526	0.329853	0.401714	0.978268	0.618205	0.488155	0.630836	0.255229	0.828151	0.712619	0.517317	0.719375	0.831473	0.839269	0.441612	0.79562	0.386718	0.332872	0.812186	0.739182
ALDH18A1	Delta-1-pyrroline-5-carboxylate synthase	metabolic process	cytoplasm;cytosol;membrane;mitochondrion	catalytic activity;nucleotide binding;protein binding;RNA binding	Metabolic pathways; Arginine and proline metabolism; Biosynthesis of amino acids	Urea cycle and metabolism of amino groups; Amino Acid metabolism	6	6	6	6	1.308	0.392885	1.167	0.866355		1.56383	2.31578	2.34242	1.73548	2.90892	2.97806	2.00082	2.28674	2.07363	1.68182	2.91479	2.16295	1.44949	1.64706	1.48809	0.924624	1.59269	0.803558	1.10584	1.56357	1.88982	1.92831	3.313	2.27828
ALDH1A1	Retinal dehydrogenase 1	metabolic process;regulation of biological process	cytoplasm;cytosol	catalytic activity;enzyme regulator activity;nucleotide binding	Metabolic pathways; Retinol metabolism	Amino Acid metabolism; Folate-Alcohol and Cancer Pathway; Tryptophan metabolism; Dopaminergic Neurogenesis; Vitamin A and Carotenoid Metabolism; Fatty Acid Omega Oxidation	14	17	6	17	0.389	3.36843e-08	1.491	0.0577215		0.64317	0.580879	0.684712	0.595798	0.366111	0.372693	2.27654	0.817964	2.28547	0.665055	0.456573	0.779862	1.42283	0.408117	2.47028	1.4466	1.10544	1.60198	0.997224	0.48574	1.58983	0.468766	0.354439	0.610644
ALDH1A3	Aldehyde dehydrogenase family 1 member A3	cell organization and biogenesis;metabolic process;regulation of biological process;response to stimulus	cytoplasm;cytosol;membrane;nucleus	catalytic activity;nucleotide binding;protein binding	Glycolysis / Gluconeogenesis; Metabolism of xenobiotics by cytochrome P450; Tyrosine metabolism; Metabolic pathways; Chemical carcinogenesis; beta-Alanine metabolism; Phenylalanine metabolism; Drug metabolism - cytochrome P450; Histidine metabolism	Vitamin A and Carotenoid Metabolism	9	9	25	9	0.515	1.21338e-05	1.693	0.00247873		3.39292	1.01296	4.27149	8.37217	1.13404	9.70251	3.27965	2.24408	5.75781	20.8309	4.22966	24.1953	11.1783	2.48866	16.8417	59.8102	11.6047	64.6558	4.48141	2.00967	5.24347	16.9416	3.37093	21.7495
ALDH1B1	Aldehyde dehydrogenase X, mitochondrial	metabolic process	mitochondrion;organelle lumen	catalytic activity;nucleotide binding	Arginine and proline metabolism; Lysine degradation; Glycolysis / Gluconeogenesis; Valine, leucine and isoleucine degradation; Histidine metabolism; Pentose and glucuronate interconversions; beta-Alanine metabolism; Metabolic pathways; Fatty acid degradation; Pyruvate metabolism; Tryptophan metabolism; Ascorbate and aldarate metabolism; Glycerolipid metabolism		10	10	10	6	1.796	0.000838158	1.126	0.948867		1.45786	1.72774	1.01788	2.12807	4.36982	1.76312	1.76454	2.35567	1.93963	3.98058	5.10507	3.1964	1.36711	2.79121	0.564175	1.8834	4.77044	2.17562	1.4421	2.82441	1.97374	2.49326	4.88945	2.31635
ALDH1L1	Isoform 3 of Cytosolic 10-formyltetrahydrofolate dehydrogenase	metabolic process	cytosol;mitochondrion	catalytic activity		One Carbon Metabolism; Folate-Alcohol and Cancer Pathway	11	5	11	11	100	8.91795e-17	1	0.974055		0.0272595	0.591802	0	0	0.33481	0.0169849	0	1.63828	0.0129777	0	0.859838	0.018119	0	0.47476	0.0365458	0	0.612513	0.117542	0.0200527	0.116979	0	0	0.0223156	0
ALDH1L2	Mitochondrial 10-formyltetrahydrofolate dehydrogenase	metabolic process	cytoplasm;mitochondrion;organelle lumen	catalytic activity	One carbon pool by folate		17	6	6	6	0.872	0.674262	1.031	0.978079		5.20547	5.20636	5.9806	3.89501	4.54183	4.44402	3.90087	3.75778	2.61535	3.74388	3.51744	2.7089	4.29671	3.62038	4.01332	1.81687	2.47442	1.92706	4.25376	3.68003	3.83102	3.36714	3.01135	2.17418
ALDH2	Aldehyde dehydrogenase, mitochondrial	metabolic process	mitochondrion;organelle lumen	catalytic activity;nucleotide binding	Pentose and glucuronate interconversions; beta-Alanine metabolism; Arginine and proline metabolism; Glycerolipid metabolism; Lysine degradation; Metabolic pathways; Fatty acid degradation; Glycolysis / Gluconeogenesis; Pyruvate metabolism; Valine, leucine and isoleucine degradation; Histidine metabolism; Tryptophan metabolism; Ascorbate and aldarate metabolism	Fatty Acid Omega Oxidation; Tryptophan metabolism	6	6	6	6	0.944	0.932516	0.957	0.836764		2.26206	1.93001	1.61469	1.28539	1.3452	1.69293	1.94954	2.18814	1.4038	1.50041	1.62629	1.27558	1.46571	1.24071	1.29481	1.22847	1.52675	1.58028	1.56146	1.79261	1.61409	1.83761	1.71309	1.65287
ALDH3A1	Aldehyde dehydrogenase, dimeric NADP-preferring	metabolic process;regulation of biological process;response to stimulus	cytoplasm;cytosol;endoplasmic reticulum;membrane	catalytic activity;protein binding	Phenylalanine metabolism; Metabolism of xenobiotics by cytochrome P450; Chemical carcinogenesis; Histidine metabolism; Metabolic pathways; Glycolysis / Gluconeogenesis; Drug metabolism - cytochrome P450; beta-Alanine metabolism; Tyrosine metabolism	NRF2 pathway; Aryl Hydrocarbon Receptor Pathway	25	18	17	6	0.684	0.0302618	1.164	0.873177		9.3935	4.18154	8.75382	3.12242	2.68466	4.33403	7.47478	7.05078	9.26695	4.92141	3.62954	9.91081	10.9132	3.57782	19.6867	37.3765	21.3831	53.8019	2.63045	3.56069	2.1827	4.16183	1.84318	7.34804
ALDH3A2	Isoform 2 of Fatty aldehyde dehydrogenase	metabolic process	membrane	catalytic activity		Tryptophan metabolism	6	6	6	6	0.744	0.123264	1.044	0.986467		3.0777	2.06323	3.52003	1.89486	1.33408	2.41767	4.50754	3.76684	4.15217	3.44514	2.24696	4.33416	5.10416	2.18505	5.44986	7.43953	3.89098	6.75765	3.34418	2.9243	2.94151	3.29329	1.83665	4.63753
ALDH4A1	Delta-1-pyrroline-5-carboxylate dehydrogenase, mitochondrial	metabolic process	mitochondrion;organelle lumen	catalytic activity;protein binding	Alanine, aspartate and glutamate metabolism; Metabolic pathways; Arginine and proline metabolism		6	6	6	6	1.074	0.979508	1.024	0.972026		0.431549	0.395813	0.38969	0.212287	0.465718	0.378207	0.484124	0.415686	0.216109	0.211622	0.460152	0.15336	0.355995	0.412984	0.342738	0.214218	0.317147	0.212708	0.348068	0.582063	0.361625	0.242778	0.568473	0.291253
ALDH6A1	Methylmalonate-semialdehyde dehydrogenase [acylating], mitochondrial	cell differentiation;metabolic process	mitochondrion;organelle lumen	catalytic activity;RNA binding	beta-Alanine metabolism; Metabolic pathways; Carbon metabolism; Inositol phosphate metabolism; Propanoate metabolism; Valine, leucine and isoleucine degradation		14	6	18	6	1.314	0.364051	1.285	0.476083		20.2515	12.675	20.5581	21.328	28.9947	84.5997	33.2516	16.9996	34.3548	24.036	18.1352	24.4278	80.1382	18.6155	58.6124	63.5589	42.5614	81.706	32.1025	23.5524	40.4079	23.8534	16.8109	24.8387
ALDH7A1	Isoform 2 of Alpha-aminoadipic semialdehyde dehydrogenase	metabolic process	cytosol;mitochondrion;nucleus;organelle lumen	catalytic activity;protein binding			6	6	6	6	1.729	0.00782208	1.188	0.80579		0.483236	0.755314	0.503555	0.432436	0.667792	0.517175	0.764361	1.17951	0.896409	0.687935	0.908784	0.803541	0.704438	1.02029	0.696111	0.858007	0.956901	0.786727	0.573317	1.08222	0.638493	0.743089	0.940135	0.819047
ALDH9A1	4-trimethylaminobutyraldehyde dehydrogenase	metabolic process	cytoplasm;cytosol	catalytic activity	Tryptophan metabolism; Fatty acid degradation; Pyruvate metabolism; Arginine and proline metabolism; Ascorbate and aldarate metabolism; Glycerolipid metabolism; Valine, leucine and isoleucine degradation; Lysine degradation; Glycolysis / Gluconeogenesis; Histidine metabolism; Metabolic pathways; beta-Alanine metabolism	Tryptophan metabolism	6	6	6	6	0.946	0.927994	1.079	0.978079		9.63783	8.73744	10.3521	10.2541	11.123	13.3104	7.94666	8.46645	8.06211	6.8404	7.37718	7.80505	7.89578	6.30029	12.6521	14.0102	9.25346	13.1016	10.7181	7.692	7.92774	12.761	9.05613	14.0025
ALDOA	Isoform 2 of Fructose-bisphosphate aldolase A	cell organization and biogenesis;cellular homeostasis;metabolic process;regulation of biological process;transport	cytoskeleton;cytosol;extracellular;membrane;nucleus;organelle lumen	catalytic activity;protein binding;RNA binding		Glycolysis and Gluconeogenesis; Sudden Infant Death Syndrome (SIDS) Susceptibility Pathways	6	6	6	6	0.905	0.805989	0.836	0.323723		114.375	108.786	90.2827	126.699	81.2825	87.7463	100.787	73.1212	74.9761	106.069	66.2448	73.9824	110.136	116.494	81.4615	89.3862	92.6998	88.6844	128.135	104.103	96.2509	119.696	61.4366	63.599
ALDOC	Fructose-bisphosphate aldolase C	cell differentiation;metabolic process;transport	cytoskeleton;cytosol;extracellular;mitochondrion;organelle lumen	catalytic activity;protein binding	Glycolysis / Gluconeogenesis; Carbon metabolism; Metabolic pathways; Pentose phosphate pathway; Biosynthesis of amino acids; Fructose and mannose metabolism	Glycolysis and Gluconeogenesis	6	6	17	6	0.897	0.76911	0.809	0.208873		7.01691	3.31717	3.11408	3.91058	2.82261	2.15801	5.40327	3.80678	3.64693	6.37954	4.40503	5.12806	10.2442	12.3742	7.64593	5.7922	8.22515	6.95732	3.3972	3.5538	3.44472	2.31636	1.85936	2.78778
ALG5	Dolichyl-phosphate beta-glucosyltransferase	metabolic process	endoplasmic reticulum;membrane	catalytic activity	Metabolic pathways; N-Glycan biosynthesis		6	3	3	6	1.898	0.0065328	0.903	0.712069		0.137526	0.540919	0.409919	0.276828	0.386685	0.147424	0.174034	0.367195	0.0657905	0.353147	0.179445	0.208907	0.106283	0.12832	0.100472	0.271296	0.212168	0.171249	0.145108	0.268757	0.0985344	0.045758	0.119316	0.204219
ALPL	Alkaline phosphatase, tissue-nonspecific isozyme	cell differentiation;metabolic process;response to stimulus	extracellular;membrane	catalytic activity;metal ion binding;protein binding	Folate biosynthesis; Thiamine metabolism; Metabolic pathways	Role of Osx and miRNAs in tooth development; Brain-Derived Neurotrophic Factor (BDNF) signaling pathway; Endochondral Ossification; NOTCH1 regulation of human endothelial cell calcification; AGE/RAGE pathway	14	3	3	4	1.471	0.233484	1.053	0.988869		0.416941	0.505295	0.387032	0.195627	0.329121	0.0244572	0.44481	1.15418	0.84622	0.115058	0.123974	0.207372	0.596497	0.192114	0.451222	0.29242	0.0653978	0.344146	0.254878	0.413284	0.327804	0.0342873	0.0993521	0.246025
ALYREF	THO complex subunit 4	cell differentiation;metabolic process;regulation of biological process;response to stimulus;transport	cytosol;membrane;spliceosomal complex	protein binding;RNA binding	Herpes simplex infection; mRNA surveillance pathway; RNA transport; Spliceosome		23	6	24	6	0.771	0.674262	1.266	0.925226		0	0	0.0340295	0.0423844	0.150899	0.0375874	0.0418229	0.127582	0.101858	0.0684842	0.142182	0.0847198	0.0322776	0.0632045	0.032834	0.133764	0.0285567	0.0395913	0.128412	0.104994	0.119697	0.179184	0.150145	0.173406
AMPD2	AMP deaminase 2	metabolic process	cytosol	catalytic activity;metal ion binding;protein binding	Metabolic pathways; Purine metabolism		6	6	6	6	1.292	0.640331	0.886	0.66433		0.372837	0.456695	0.375883	0.52674	0.491982	0.403025	0.373171	0.260568	0.365744	0.526264	0.507546	0.63687	0.294051	0.426954	0.312381	0.393006	0.364666	0.421903	0.158143	0.227126	0.259034	0.19488	0.224787	0.11136
ANK3	Isoform 2 of Ankyrin-3	cell organization and biogenesis;regulation of biological process;response to stimulus;transport	cell surface;cytoskeleton;cytosol;endoplasmic reticulum;Golgi;membrane;vacuole	protein binding;structural molecule activity			6	6	6	6	0.924	0.875169	1.324	0.350653		18.476	14.4305	21.1566	9.97358	8.34018	18.4864	11.3552	13.16	13.2823	10.6922	9.80463	15.7372	12.3805	8.66586	18.1147	14.7154	10.0044	15.4308	11.3104	10.6467	10.7137	9.1491	7.688	12.191
ANKFY1	Isoform 4 of Ankyrin repeat and FYVE domain-containing protein 1	cell organization and biogenesis;regulation of biological process;transport	cytosol;endosome;membrane	metal ion binding;protein binding			6	6	6	6	0.975	0.977999	0.908	0.773728		0.28321	0.308599	0.196642	0.231381	0.172532	0.122306	0.293889	0.166923	0.241911	0.161089	0.180121	0.226556	0.198039	0.177242	0.136172	0.108423	0.159594	0.120254	0.0972962	0.107255	0.096755	0.0881042	0.0806058	0.129971
ANKRD44	Isoform 2 of Serine/threonine-protein phosphatase 6 regulatory ankyrin repeat subunit B			protein binding			13	6	10	18	10.975	8.91795e-17	1.319	0.846724		0	0.0224539	0	0.0215071	0.0258072	0	0	0.0524268	0.0510457	0.03493	0.0354044	0.0803768	0.055642	0	0	0	0	0	0.0816207	0.0984954	0.0999845	0.0917547	0.0644022	0.0516176
ANO6	Isoform 2 of Anoctamin-6	cell organization and biogenesis;cellular component movement;cellular homeostasis;coagulation;regulation of biological process;response to stimulus;transport	cell surface;cytosol;membrane	protein binding;transporter activity			6	6	6	6	0.994	0.991693	1.107	0.948867		0.32159	0.46525	0.433661	0.254109	0.317896	0.286618	0.330149	0.311388	0.353173	0.293484	0.297149	0.349293	0.35108	0.30765	0.356265	0.389982	0.27801	0.288312	0.296335	0.316355	0.321217	0.274071	0.325385	0.323533
ANP32A	Acidic leucine-rich nuclear phosphoprotein 32 family member A	cell organization and biogenesis;metabolic process;regulation of biological process;response to stimulus;transport	cytoplasm;endoplasmic reticulum;nucleus	protein binding;RNA binding			6	6	6	6	0.678	0.0176975	1.162	0.881556		2.2526	1.34746	3.14793	2.51242	2.60084	3.64998	3.14409	2.90723	3.3205	3.31808	3.20106	3.9149	2.22526	1.72305	1.95719	2.39512	1.95035	2.78619	2.65505	2.21227	2.86761	2.61165	2.38045	2.91889
ANP32B	Acidic leucine-rich nuclear phosphoprotein 32 family member B	cell organization and biogenesis;metabolic process;regulation of biological process	cytoplasm;nucleus	protein binding			6	6	25	6	0.838	0.73322	1.121	0.948867		0.509962	0.148394	0.160233	0.534952	0.411509	0.601363	0.51136	0.591383	0.32815	0.44692	0.589327	0.656429	0.474231	0.405397	0.180678	0.570078	0.499262	0.316943	0.501469	0.43208	0.278563	0.716143	0.560541	0.807384
ANP32E	Acidic leucine-rich nuclear phosphoprotein 32 family member E	cell organization and biogenesis;regulation of biological process;transport	cytoplasm;nucleus	enzyme regulator activity;protein binding			6	6	6	6	1.043	0.99965	1.215	0.873177		0.189649	0.0850566	0.221465	0.175984	0.174826	0.221022	0.185709	0.190494	0.218543	0.251251	0.172219	0.233889	0.189917	0.298378	0.337268	0.390094	0.307323	0.412997	0.0743745	0.0470783	0.141682	0.139448	0.0938585	0.0993949
ANPEP	Aminopeptidase N	cell communication;cell differentiation;development;metabolic process;regulation of biological process;response to stimulus;transport	membrane;nucleus	catalytic activity;metal ion binding;receptor activity	Glutathione metabolism; Metabolic pathways; Hematopoietic cell lineage; Renin-angiotensin system	Glutathione metabolism; Cardiac Progenitor Differentiation	6	6	6	3	2.215	1.70773e-06	1.716	0.00164839		2.60268	4.34468	4.06775	1.87035	2.49414	2.70438	2.84192	6.97954	4.84465	2.23035	4.91816	3.76089	5.70912	6.06815	10.5208	7.67602	7.6213	8.38323	2.70347	6.2103	2.94417	3.16625	6.6597	4.39401
ANTXR1	Anthrax toxin receptor 1	cell organization and biogenesis;regulation of biological process;response to stimulus	cell surface;membrane	metal ion binding;protein binding;receptor activity;signal transducer activity	NOD-like receptor signaling pathway		6	6	6	6	0.87	0.805989	1.005	0.948867		0.346049	0.482656	0.342057	0.5244	0.385817	0	0.286123	0.23236	0.285788	0.343637	0.294687	0.204862	0.260799	0.227108	0.226518	0.278092	0.232578	0.269217	0.441073	0.393212	0.423427	0.634743	0.395891	0.432517
ANXA1	Annexin A1	cell differentiation;cell organization and biogenesis;cellular component movement;defense response;metabolic process;regulation of biological process;response to stimulus;transport	cell surface;cytoplasm;cytoskeleton;cytosol;endosome;extracellular;membrane;nucleus;vacuole	catalytic activity;DNA binding;enzyme regulator activity;metal ion binding;protein binding;RNA binding;structural molecule activity		Prostaglandin Synthesis and Regulation; Integrated Breast Cancer Pathway; VEGFA-VEGFR2 Signaling Pathway; Spinal Cord Injury	6	6	6	6	0.93	0.889924	1.133	0.926886		133.215	114.714	143.797	131.313	97.2666	122.05	128.141	132.314	143.796	121.584	117.888	134.849	131.104	115.47	152.451	136.104	130.183	141.724	116.784	105.204	113.392	113.588	80.8021	113.274
ANXA11	Annexin A11	cell division;response to stimulus;transport	cytoplasm;cytoskeleton;cytosol;membrane;nucleus;vacuole	metal ion binding;protein binding;RNA binding			6	6	6	6	1.054	0.99965	1.137	0.917084		7.19353	5.56875	5.57676	4.62782	5.07538	5.01343	5.57467	7.21711	6.703	5.14239	6.06628	5.1729	5.54146	5.66872	5.59251	5.18701	5.71689	5.82963	5.61812	6.39153	5.38176	4.96731	5.26053	5.70399
ANXA2	Isoform 2 of Annexin A2	cell organization and biogenesis;metabolic process;regulation of biological process;response to stimulus;transport	cell surface;cytoplasm;cytosol;endosome;extracellular;membrane;nucleus;organelle lumen	enzyme regulator activity;metal ion binding;protein binding;RNA binding		Prostaglandin Synthesis and Regulation	6	6	6	6	0.99	0.979508	1.024	0.972026		341.704	281.048	369.1	339.793	305.578	327.225	338.408	362.356	343.824	396.172	358.23	409.445	379.771	347.407	371.114	400.808	344.076	404.055	314.406	327.862	312.329	414.13	304.631	405.037
ANXA3	Annexin A3	defense response;regulation of biological process;response to stimulus;transport	cytoplasm;cytosol;membrane	enzyme regulator activity;metal ion binding;protein binding		Prostaglandin Synthesis and Regulation	28	25	25	25	1.143	0.89631	1.039	0.971032		1.52461	1.12984	0.968406	4.08735	2.40648	2.29231	1.36715	1.55325	1.29884	3.88763	3.0021	2.9458	0.844273	1.13736	0.939757	4.23074	3.2081	4.30984	1.38609	1.33605	1.48177	3.85898	2.60411	4.11309
ANXA4	Annexin A4	cell differentiation;regulation of biological process;response to stimulus	cell surface;cytoplasm;membrane;nucleus	enzyme regulator activity;metal ion binding;protein binding		Prostaglandin Synthesis and Regulation	6	6	6	6	0.835	0.488011	1.11	0.948867		6.63407	4.73743	7.67068	6.3442	4.77966	6.73461	8.41173	7.34607	8.8216	6.70787	5.8378	6.75903	8.12301	5.93908	7.10835	10.9827	8.17056	10.6254	7.54843	6.38777	7.34659	7.72865	5.42298	7.70783
ANXA5	Annexin A5	coagulation;regulation of biological process;response to stimulus;transport	cytoplasm;cytosol;extracellular;membrane	enzyme regulator activity;metal ion binding;protein binding		Simplified Interaction Map Between LOXL4 and Oxidative Stress Pathway; Prostaglandin Synthesis and Regulation; Apoptosis-related network due to altered Notch3 in ovarian cancer	6	6	6	6	1.221	0.673008	0.984	0.930402		84.8307	96.7258	66.6848	79.666	86.1311	71.0697	71.7352	83.8079	64.5545	66.8123	77.3641	71.5138	70.3998	85.668	69.2426	69.0429	80.9551	73.665	62.0264	91.2338	62.2327	76.6827	74.4586	80.2253
ANXA6	Annexin	cell organization and biogenesis;cellular homeostasis;regulation of biological process;response to stimulus;transport	membrane;mitochondrion	metal ion binding;nucleotide binding;protein binding;transporter activity		Prostaglandin Synthesis and Regulation; Calcium Regulation in the Cardiac Cell	6	6	6	6	1.196	0.737145	1.128	0.935691		90.5079	95.1881	65.6541	68.885	100.271	63.577	89.9501	99.0821	80.9614	60.7392	87.322	76.6714	57.332	79.2988	53.0929	53.1797	67.4634	50.0353	96.4578	104.302	88.5403	70.6493	88.161	87.8951
ANXA7	Annexin A7	cell differentiation;cell organization and biogenesis;cell proliferation;cellular homeostasis;metabolic process;regulation of biological process;response to stimulus	cytosol;membrane;nucleus	metal ion binding;protein binding;RNA binding			10	6	6	18	0.959	0.966079	1.095	0.978079		0.935195	0.825119	0.871827	0.838245	0.80862	0.928708	0.969546	1.23325	1.11713	0.92619	0.991286	3.41408	0.930774	0.878146	0.686084	2.53499	2.50707	0.87692	0.99281	1.57995	1.73982	1.9369	1.46167	2.01623
AP1M1	Isoform 2 of AP-1 complex subunit mu-1	cell organization and biogenesis;regulation of biological process;transport	cytosol;membrane	protein binding			6	6	6	6	1.169	0.882201	1.122	0.948867		0.261023	0.334086	0.30895	0.398512	0.486506	0.33357	0.543711	0.514671	0.126414	0.41646	0.419083	0.299978	0.413837	0.329551	0.268707	0.316319	0.431775	0.267663	0.257951	0.41331	0.293202	0.362627	0.230039	0.404487
AP2A1	AP-2 complex subunit alpha-1	cell organization and biogenesis;cellular component movement;metabolic process;regulation of biological process;response to stimulus;transport	cytosol;membrane	protein binding;transporter activity	Endocytosis; Endocrine and other factor-regulated calcium reabsorption; Synaptic vesicle cycle; Huntington's disease	EGF/EGFR Signaling Pathway; Synaptic Vesicle Pathway	6	6	6	6	1.116	0.937168	1.017	0.959388		4.35999	5.62715	4.94697	5.01978	5.95076	4.02451	5.94393	6.91433	5.82545	5.66197	6.14763	5.04165	5.34112	5.07861	4.46179	4.79188	5.31375	5.2877	5.89294	5.92717	5.4312	6.17258	6.63717	5.14711
AP2A2	Isoform 2 of AP-2 complex subunit alpha-2	cell organization and biogenesis;cellular component movement;metabolic process;regulation of biological process;response to stimulus;transport	cytosol;membrane	protein binding;transporter activity		Synaptic Vesicle Pathway	6	6	6	6	0.964	0.979508	1.012	0.948867		0.422977	0.748701	0.438023	0.419837	0.690891	0.444078	0.753986	0.806831	0.885734	0.801141	1.11859	0.758165	0.52725	0.594588	0.400844	0.262856	0.400893	0.456049	0.688417	0.379336	0.634135	0.685427	0.727256	0.670249
AP2B1	Isoform 2 of AP-2 complex subunit beta	cell organization and biogenesis;cellular component movement;metabolic process;regulation of biological process;response to stimulus;transport	cytoplasm;cytosol;membrane	protein binding;transporter activity		EGF/EGFR Signaling Pathway; Synaptic Vesicle Pathway	6	6	6	6	1.109	0.940895	1.029	0.976966		4.28092	5.49719	5.77079	6.07799	6.85894	4.73604	8.40648	9.25852	7.61556	7.28802	8.67499	7.78444	6.41075	7.21852	6.13813	6.63979	7.14997	6.75106	7.0341	6.67141	5.93669	7.17914	7.64606	8.76813
AP2M1	AP-2 complex subunit mu	cell organization and biogenesis;cellular component movement;metabolic process;regulation of biological process;response to stimulus;transport	cytosol;membrane;mitochondrion	protein binding;transporter activity		Synaptic Vesicle Pathway; EGF/EGFR Signaling Pathway	6	6	6	6	1.054	0.99965	0.908	0.629888		2.52167	3.73276	2.68387	2.43494	2.21714	2.16114	3.10189	2.88276	2.23368	3.45682	2.5828	3.1207	3.2339	3.3491	2.03739	2.45556	2.71394	2.29803	2.95206	3.43628	2.23608	3.19178	3.06811	2.88875
AP3B1	AP-3 complex subunit beta-1	cell organization and biogenesis;cellular component movement;coagulation;regulation of biological process;transport	Golgi;membrane	protein binding	Lysosome		6	6	6	6	1.15	0.933832	0.991	0.936312		0.223652	0.349704	0.318807	0.343832	0.347984	0.291798	0.38976	0.365204	0.337425	0.321216	0.369764	0.327842	0.278678	0.34175	0.212177	0.296671	0	0.208568	0.256759	0.277753	0.249133	0.332077	0.298274	0.298958
AP3D1	Isoform 5 of AP-3 complex subunit delta-1	cell organization and biogenesis;cellular component movement;metabolic process;regulation of biological process;transport	Golgi;membrane	transporter activity			6	6	15	6	1.271	0.610012	0.835	0.277809		1.74439	0.536365	0.0291384	0.392704	0.483505	0.186434	0.534048	0.510109	0.49604	0.618053	0.43397	0.518489	0.252469	0.840376	0.461149	0.684305	0.657564	0.460404	0.721263	0.813639	0.454868	0.512866	0.522684	0.786204
AP3S1	AP-3 complex subunit sigma-1	cellular component movement;regulation of biological process;response to stimulus;transport	Golgi;membrane	protein binding;transporter activity	Lysosome		6	6	6	6	0.937	0.939631	1.011	0.9478		1.06401	1.13809	1.32418	1.2541	1.2041	1.26484	1.14807	0.995793	1.28271	1.14843	1.05803	1.32396	0.962862	0.841066	0.945438	1.19137	1.01134	1.2023	2.59367	1.30541	1.62891	1.66548	1.41169	1.68292
APEH	Acylamino-acid-releasing enzyme	metabolic process	cytosol;membrane	catalytic activity			6	6	6	6	1.215	0.662865	1.117	0.948867		2.3653	2.54665	1.96727	1.94796	2.08291	1.85141	1.59013	1.88218	1.67648	2.07741	2.00587	2.04086	1.87206	2.17033	2.06546	2.16577	2.30964	2.25031	1.8753	2.32225	1.60128	1.75946	1.96321	2.07025
APEX1	DNA-(apurinic or apyrimidinic site) lyase	cell organization and biogenesis;cellular homeostasis;metabolic process;regulation of biological process;response to stimulus	cytoplasm;endoplasmic reticulum;mitochondrion;nucleus;ribosome	catalytic activity;DNA binding;metal ion binding;protein binding;RNA binding	Base excision repair	Human Thyroid Stimulating Hormone (TSH) signaling pathway; Spinal Cord Injury	6	6	6	6	0.967	0.956285	1.118	0.948867		1.61586	1.96675	1.92471	2.84753	2.01424	2.46687	2.25702	2.17364	2.54407	2.68841	2.11732	2.90759	1.68776	1.20904	2.01117	2.28575	2.28975	1.99071	2.17173	1.93338	1.68457	2.63623	1.87039	2.73948
API5	Isoform 2 of Apoptosis inhibitor 5	cell death;regulation of biological process	cytoplasm;membrane;nucleus;spliceosomal complex	protein binding;RNA binding			14	6	15	25	0.418	3.87377e-07	1.077	0.994811		1.49434	0.26815	0.342373	0.546431	0.208656	0.205625	0.608924	0.626556	0.608847	1.67536	1.09185	1.47524	1.35978	0.12404	0.928336	0.288823	0.200287	0.589959	1.28248	1.32546	2.17085	0.703662	0.675436	2.16921
APMAP	Adipocyte plasma membrane-associated protein	metabolic process	cell surface;endoplasmic reticulum;membrane	catalytic activity			6	6	6	6	1.31	0.335895	1.078	0.986467		1.20665	2.56023	1.74824	1.88986	2.68126	2.13146	1.73269	2.03346	1.70827	1.70332	2.27983	1.62787	2.08481	3.73045	1.89659	1.89582	2.15944	1.88203	2.33064	2.26505	2.42301	2.76059	2.6385	3.08537
APOL2	Apolipoprotein L2	defense response;development;metabolic process;response to stimulus;transport	extracellular;membrane	protein binding			6	6	6	6	1.021	0.999882	0.943	0.745035		1.27876	1.54203	1.2944	1.33933	1.29595	1.01847	1.22094	0.987306	1.12577	1.24335	1.06685	1.02433	1.13811	1.3117	0.891481	1.19187	1.25872	1.24888	0.730017	0.671586	0.472395	0.655043	0.579272	0.458913
APOOL	Apolipoprotein O-like	cell organization and biogenesis;transport	extracellular;membrane;mitochondrion;organelle lumen	protein binding			6	6	6	6	1.017	0.99965	1.258	0.809137		0.0789109	0.184788	0.226853	0.166457	0.122715	0.248471	0.186143	0.167607	0.162388	0.163246	0.16511	0.0724699	0.323016	0.303129	0.387864	0.394458	0.282442	0.456598	0.0914027	0.10038	0.0970909	0.0580844	0.0948462	0.0647974
APP	Amyloid beta A4 protein	cell communication;cell death;cell growth;cell organization and biogenesis;cellular component movement;cellular homeostasis;defense response;metabolic process;regulation of biological process;response to stimulus;transport	cell surface;cytoplasm;cytosol;endoplasmic reticulum;endosome;extracellular;Golgi;membrane;organelle lumen;vacuole	DNA binding;enzyme regulator activity;metal ion binding;protein binding	Alzheimer's disease; Serotonergic synapse	Alzheimers Disease; TGF-beta Signaling Pathway; Endoderm Differentiation; Apoptosis-related network due to altered Notch3 in ovarian cancer; Copper homeostasis	19	28	16	14	0.01	8.91795e-17	100	1.00949e-16		0	0	0.0615581	0	0	0.16527	0.0296907	0	0.0201659	0	0	0.0229254	0	0	0.0892565	0	0	0.0373411	0	0	0	0.0357548	0.0217684	0.0254403
APPL1	DCC-interacting protein 13-alpha	cell proliferation;regulation of biological process;response to stimulus	cytoplasm;cytosol;endosome;membrane;nucleus	protein binding	Longevity regulating pathway; Colorectal cancer; Pathways in cancer	Follicle Stimulating Hormone (FSH) signaling pathway	6	5	22	4	0.999	0.998529	0.83	0.446064		0.401063	0.0952177	0.146817	0	0.022352	0	0.0794063	0.262386	0.176166	0	0.0380359	0.0324941	0.130051	0.0475744	0.0940024	0.150468	0.128293	0.0499694	0	0.0973021	0	0	0	0.0247732
APPL2	Isoform 3 of DCC-interacting protein 13-beta	cell proliferation;regulation of biological process;response to stimulus	cytoplasm;membrane;nucleus	protein binding			6	6	6	6	1.075	0.988928	1.178	0.954045		0.0817943	0.0265841	0.0730761	0.0431966	0.0562697	0.0785243	0.0761578	0.102791	0.0903409	0.100067	0.148461	0.146156	0.0652861	0.172162	0.0538523	0.0631852	0.0853906	0.142904	0.170139	0.139361	0.18569	0.115382	0.0792926	0.181787
APRT	Adenine phosphoribosyltransferase	metabolic process;response to stimulus;transport	cytoplasm;cytosol;extracellular;organelle lumen	catalytic activity;nucleotide binding	Metabolic pathways; Purine metabolism		6	25	6	6	1.235	0.671999	1.159	0.884131		0.770795	0.83675	0.198674	0.623518	0.693266	0.369016	0.697328	0.883029	0.849787	0.918764	0.878206	0.815757	0.68024	0.988368	0.776819	0.729668	0.725434	0.590746	0.151257	0.739615	0.16747	0.790435	0.695663	1.01508
ARCN1	Archain 1, isoform CRA_a	response to stimulus;transport	cytosol;membrane	RNA binding		miR-517 relationship with ARCN1 and USP1	6	6	6	6	1.085	0.971955	1.075	0.988545		3.8648	4.06199	2.90574	3.52874	3.64581	4.00484	3.2399	3.93527	3.4133	3.3403	4.4671	4.00955	3.15138	3.50121	2.60232	2.93832	3.25844	2.81508	4.17995	4.03418	3.57105	3.5157	4.2736	3.47125
ARF3	ADP-ribosylation factor 3	metabolic process;regulation of biological process;response to stimulus;transport	cytoplasm;Golgi;membrane	catalytic activity;nucleotide binding;protein binding;signal transducer activity	Endocytosis		6	25	6	6	1.017	0.999882	1.118	0.948867		0.312137	0.420229	0.291015	0.516691	0.553271	0.535931	0.831639	0.797108	0.69382	0.512693	0.907168	0.730006	0.66363	0.402033	0.504268	0.776173	0.984854	0.648365	0.719064	0.520639	0.867332	1.51097	1.44237	2.18159
ARF4	ADP-ribosylation factor 4	cellular component movement;metabolic process;regulation of biological process;response to stimulus;transport	cytosol;Golgi;membrane	catalytic activity;nucleotide binding;protein binding;signal transducer activity			6	6	6	6	1.106	0.943447	1.11	0.948867		3.30667	4.53619	3.68846	6.44278	6.09816	4.70873	6.63859	7.65113	5.86982	6.01233	8.39623	6.88339	4.23762	4.85497	3.39049	3.80043	4.6375	3.31129	5.44063	5.72038	6.13664	7.40607	7.76257	8.33414
ARF5	ADP-ribosylation factor 5	regulation of biological process;response to stimulus;transport	cytoplasm;Golgi;membrane	catalytic activity;nucleotide binding;protein binding;signal transducer activity	Endocytosis		6	6	6	6	1.102	0.944898	0.897	0.518529		0.606705	0.734398	0.636223	0.625944	0.565822	0.630178	0.716124	0.860289	0.657473	0.640745	0.698829	0.64115	0.645311	0.728318	0.535892	0.573382	0.618699	0.52698	1.42928	1.13121	0.882656	1.16747	1.01157	1.20163
ARFGAP1	Isoform 2 of ADP-ribosylation factor GTPase-activating protein 1	regulation of biological process;transport	cytosol;Golgi	enzyme regulator activity;metal ion binding;protein binding			13	0	0	26	0.01	8.91795e-17	0.01	1.00949e-16		0	0	0	0	0	0	0	0	0	0	0.02082	0	0.0188801	0	0	0	0	0	0	0	0	0	0	0
ARFGAP2	ADP-ribosylation factor GTPase-activating protein 2	regulation of biological process;transport	cytoplasm;cytosol;Golgi;membrane	enzyme regulator activity;metal ion binding	Endocytosis		6	6	6	6	1.037	0.99965	1.135	0.948867		0.247564	0.202247	0.23822	0.208367	0.0393947	0.221554	0.197149	0.14759	0.222982	0.19233	0.209426	0.242512	0.147349	0.176476	0.218899	0.189835	0.129176	0.18002	0.141632	0.114083	0.144831	0.145316	0.149632	0.183919
ARFGAP3	ADP-ribosylation factor GTPase-activating protein 3	regulation of biological process;transport	cytoplasm;cytosol;Golgi;membrane	enzyme regulator activity;metal ion binding;protein binding;transporter activity	Endocytosis		1	6	6	6	1.15	0.917225	0.996	0.948867		0.640195	0.88371	0.437235	0.779702	0.764581	0.54657	0.344972	0.384711	0.550211	0.100829	0.380485	0.397534	0.058219	0.56517	0.0452211	0.15904	0.126974	0.103894	0.427433	0.139693	0.446335	0.492002	0.664693	0.273569
ARFIP1	Arfaptin-1	regulation of biological process;transport	cytoplasm;cytosol;membrane	protein binding			6	25	10	6	1.138	0.940772	1.165	0.941581		0.119427	0.387306	0.177798	0.394355	0.404301	0.22143	0.353473	0.43717	0.418557	0.44807	0.50357	0.478736	0.348022	0.30484	0.39724	0.354654	0.375853	0.375061	0.152931	0.179183	0.167386	0.257624	0.206865	0.409747
ARHGAP1	Rho GTPase-activating protein 1	regulation of biological process;response to stimulus;transport	cytoplasm;cytosol;endosome;membrane	enzyme regulator activity;protein binding			6	6	6	6	0.905	0.823235	0.976	0.881556		0.946744	1.19262	0.700626	1.30314	1.44606	1.19507	1.99358	1.86742	1.71925	1.52177	1.83561	1.57667	1.8416	1.41349	1.61311	1.49839	1.70887	1.57947	2.25664	1.81445	2.15082	2.10774	2.30373	2.28068
ARHGAP17	Rho GTPase-activating protein 17	regulation of biological process;response to stimulus	cytoplasm;cytosol;membrane;nucleus	enzyme regulator activity;protein binding			6	6	6	6	0.91	0.904431	1.068	0.996217		0.308582	0.245653	0.277161	0.224628	0.229578	0.221224	0.183911	0.193726	0.217105	0.223353	0.199729	0.254617	0.216037	0.217167	0.221909	0.206082	0.209018	0.214761	0.190787	0.162863	0.170736	0.153116	0.136916	0.182712
ARHGAP18	Rho GTPase-activating protein 18	cell organization and biogenesis;regulation of biological process;response to stimulus	cytoplasm;cytosol;membrane	enzyme regulator activity;protein binding			6	25	6	25	1.758	0.0418634	1.231	0.873756		0.111481	0.143259	0.136057	0.19042	0.150291	0.164651	0.122408	0.205513	0.173697	0.282697	0.366382	0.362535	0.160307	0.280808	0.350492	0.284928	0.320082	0.359553	0.0722143	0.127903	0.181778	0.287206	0.316296	0.265935
ARHGDIA	Rho GDP-dissociation inhibitor 1	cellular component movement;regulation of biological process;response to stimulus	cytoplasm;cytoskeleton;cytosol;membrane;nucleus	enzyme regulator activity;protein binding			6	6	6	6	0.863	0.63036	1.105	0.948867		27.579	22.6461	25.4517	22.457	19.3728	24.0392	26.2456	22.4658	27.6606	31.3026	23.6894	27.039	21.5288	31.7047	20.5974	19.6144	17.1365	25.6774	22.9097	25.6005	21.5785	18.912	14.9719	17.0466
ARHGEF17	Rho guanine nucleotide exchange factor 17	cell organization and biogenesis;regulation of biological process;response to stimulus	cytosol	protein binding			0	1	0	14	1	0.99965	1.515	0.669454		0	0	0	0	0	0	0.0299916	0	0.0447924	0	0.0448913	0.0472395	0	0	0	0	0	0	0	0.0711351	0	0.0483538	0	0
ARHGEF2	Rho guanine nucleotide exchange factor 2	regulation of biological process;response to stimulus		metal ion binding			6	17	6	15	0.452	0.000314273	0.849	0.368799		0.596654	0.195306	0.447589	0.9215	0.579666	0.29133	0.625	0.105321	0.234787	0.44269	0.27064	0.321666	0.441155	0.280777	0.314876	0.256914	0.322675	0.192837	1.22231	0.362642	1.01423	0.771705	0.344695	0.32752
ARHGEF7	Isoform 5 of Rho guanine nucleotide exchange factor 7	cell differentiation;cell organization and biogenesis;regulation of biological process;response to stimulus	cytosol;membrane;vacuole	protein binding		Regulation of Actin Cytoskeleton; Integrin-mediated Cell Adhesion	6	6	6	6	1.046	0.997367	0.95	0.786155		1.1868	0.893024	0.720924	0.910872	0.788344	0.413223	0.557307	0.710262	0.892175	0.886545	0.962178	0.701026	0.763687	0.826009	0.772369	0.701041	0.952446	0.717893	0.569418	1.10052	1.21509	1.05905	1.04515	0.707885
ARL3	ADP-ribosylation factor-like protein 3	cell division;cell organization and biogenesis;cellular component movement;regulation of biological process;response to stimulus;transport	cytoplasm;cytoskeleton;Golgi;membrane;nucleus	catalytic activity;metal ion binding;nucleotide binding;protein binding;signal transducer activity			6	6	6	6	1.02	0.999799	1.005	0.948867		0.807113	0.5145	0.531154	0.543875	0.439803	0.445729	0.606652	0.671244	0.601475	0.554384	0.609125	0.688952	0.455093	0.457515	0.398119	0.379703	0.371898	0.393421	0.448604	0.4878	0.423978	0.437258	0.36761	0.556276
ARL6IP5	PRA1 family protein 3	regulation of biological process;response to stimulus;transport	cytoplasm;cytoskeleton;endoplasmic reticulum;membrane	protein binding			6	6	6	6	1.017	0.99965	1.052	0.984475		0.680171	0.683922	0.966998	1.03646	1.19349	0.867003	1.76861	2.05458	1.52654	1.24758	1.90085	1.66532	1.37524	1.44069	1.12917	1.10317	1.6661	1.27629	1.53279	1.51519	1.66574	1.22496	1.64381	1.86315
ARL8A	ADP-ribosylation factor-like protein 8A	cell division;regulation of biological process;response to stimulus;transport	cytoplasm;endosome;membrane;vacuole	catalytic activity;nucleotide binding;protein binding;signal transducer activity			6	6	3	6	1.112	0.940772	0.796	0.133196		6.35042	7.5914	3.02275	3.08827	5.74085	2.01176	3.76612	3.91166	2.90291	3.023	3.47359	2.20823	3.12784	4.22666	2.03257	2.22476	3.95452	2.20676	3.56014	4.82561	3.45428	2.00783	2.68049	2.19805
ARMCX2	Armadillo repeat-containing X-linked protein 2		membrane;mitochondrion	protein binding			0	0	20	1	100	8.91795e-17				0	0	0	0	0	0.0496508	0	0.0166797	0	0	0	0.0210869	0	0	0	0	0	0	0	0	0	0	0	0
ARMCX3	Armadillo repeat-containing X-linked protein 3	regulation of biological process	cytoplasm;membrane;mitochondrion;nucleus	protein binding			6	6	6	6	0.936	0.940895	1.064	0.994811		0.239353	0.147954	0.288739	0.221165	0.156525	0.178847	0.288624	0.254061	0.292518	0.180527	0.198111	0.255952	0.229947	0.120407	0.130278	0.109	0.118138	0.184875	0.216498	0.12583	0.13948	0.156935	0.139633	0.185748
ARPC1B	Actin-related protein 2/3 complex subunit 1B	cell organization and biogenesis;cellular component movement;regulation of biological process;response to stimulus	cytoplasm;cytoskeleton;cytosol	protein binding;structural molecule activity	Regulation of actin cytoskeleton; Endocytosis; Bacterial invasion of epithelial cells; Pathogenic Escherichia coli infection; Shigellosis; Fc gamma R-mediated phagocytosis; Salmonella infection	Microglia Pathogen Phagocytosis Pathway; Pathogenic Escherichia coli infection	6	6	6	6	1.211	0.679951	0.99	0.92044		5.34119	6.374	4.91713	3.35179	4.03003	2.18732	3.17666	3.44823	2.92425	3.72019	2.97339	3.11388	3.7121	4.51343	3.24199	2.74002	2.877	2.63773	2.4032	2.88955	2.24758	1.83395	1.81744	1.67299
ARPC2	Actin-related protein 2/3 complex subunit 2	cell organization and biogenesis;cellular component movement;regulation of biological process;response to stimulus	cytoplasm;cytoskeleton;cytosol;endosome;membrane	protein binding;structural molecule activity	Regulation of actin cytoskeleton; Endocytosis; Fc gamma R-mediated phagocytosis; Salmonella infection; Shigellosis; Bacterial invasion of epithelial cells; Pathogenic Escherichia coli infection	Pathogenic Escherichia coli infection	6	6	6	6	1.042	0.99965	1.004	0.948867		5.83811	4.65272	4.59924	6.6952	6.56177	5.15129	6.52868	6.48989	5.7386	5.62355	7.7087	6.16163	6.61162	7.29232	6.19298	5.9125	6.36161	5.3209	7.14139	7.92278	6.82523	6.665	7.40121	7.64535
ARPC3	Actin-related protein 2/3 complex subunit 3	cell organization and biogenesis;cellular component movement;regulation of biological process;response to stimulus	cytoplasm;cytoskeleton;cytosol;membrane	protein binding;structural molecule activity	Bacterial invasion of epithelial cells; Endocytosis; Salmonella infection; Fc gamma R-mediated phagocytosis; Regulation of actin cytoskeleton; Pathogenic Escherichia coli infection; Shigellosis	Pathogenic Escherichia coli infection	6	6	6	6	1.135	0.929306	0.967	0.873177		0.454595	0.259041	0.19286	0.353564	0.434822	0.311787	0.406331	0.54109	0.471022	0.601605	0.623592	0.604964	0.928186	1.20028	0.631517	0.613804	0.974354	0.72222	0.546865	0.462689	0.488834	0.355158	0.361598	0.42102
ARPC4	Isoform 2 of Actin-related protein 2/3 complex subunit 4	cell organization and biogenesis;metabolic process;regulation of biological process;response to stimulus	cytoskeleton;cytosol	catalytic activity;nucleotide binding;protein binding;structural molecule activity		Pathogenic Escherichia coli infection	6	6	6	6	1.122	0.919655	1.031	0.970006		1.31518	1.73403	1.43505	2.03993	2.07018	1.39526	2.33192	2.44319	2.30813	1.82675	2.52587	2.11263	1.80334	2.4641	1.6378	1.76594	2.00458	1.45341	1.99522	2.024	1.86561	2.00948	2.25369	1.77495
ARPC5L	Actin-related protein 2/3 complex subunit 5-like protein	cell organization and biogenesis;cellular component movement;regulation of biological process	cytoplasm;cytoskeleton	protein binding	Shigellosis; Regulation of actin cytoskeleton; Endocytosis; Fc gamma R-mediated phagocytosis; Salmonella infection; Bacterial invasion of epithelial cells; Pathogenic Escherichia coli infection	Pathogenic Escherichia coli infection	6	3	6	6	1.246	0.684984	1.142	0.918857		0.794646	0.431854	0.355401	0.383268	0.372301	0.576567	0.610832	0.724244	0.740208	0.668328	0.598839	0.715205	0.772157	0.756035	0.788255	0.883771	0.753407	0.875458	0.191973	0.4141	0.171822	0.224587	0.175595	0.17287
ARSA	Arylsulfatase A	metabolic process;transport	extracellular;organelle lumen;vacuole	catalytic activity;metal ion binding;protein binding	Lysosome; Sphingolipid metabolism		6	6	7	6	0.978	0.986995	1.308	0.818724		0.179109	0.135812	0.120062	0.0717131	0.0631272	0.113003	0.0539554	0.0988409	0.0845911	0.102854	0.0574924	0.108465	0.104523	0.0864866	0.124624	0.0272705	0.118124	0.0643375	0.0795942	0.0849016	0.0854119	0.104214	0.101661	0.116155
ARSB	Arylsulfatase B	cell organization and biogenesis;cellular component movement;metabolic process;regulation of biological process;response to stimulus;transport	cell surface;endoplasmic reticulum;extracellular;Golgi;mitochondrion;organelle lumen;vacuole	catalytic activity;metal ion binding	Metabolic pathways; Lysosome; Glycosaminoglycan degradation		6	17	6	6	0.867	0.707497	0.974	0.87921		1.7228	1.27123	1.2649	0.984211	1.1784	0.980536	0.946071	0.626555	0.854264	0.573842	0.606642	0.397317	1.27021	1.73687	1.58199	0.972246	1.33446	0.836516	1.5954	1.45895	1.4683	0.648283	1.04526	0.458266
ASAH1	Isoform 2 of Acid ceramidase	metabolic process;transport	extracellular;organelle lumen	catalytic activity		Sphingolipid Metabolism; Signal Transduction of S1P Receptor	6	17	6	6	0.897	0.770055	0.918	0.721265		6.28313	4.87555	4.69856	3.4867	3.99049	3.33691	6.39605	4.83891	4.38888	3.56121	3.89023	3.15442	5.86749	6.82932	6.44837	6.44032	6.80307	5.14662	3.08295	2.63232	2.36704	2.30065	1.28351	0.864119
ASCC3	Activating signal cointegrator 1 complex subunit 3	cell proliferation;metabolic process;regulation of biological process;response to stimulus	cytosol;membrane;nucleus	catalytic activity;nucleotide binding;protein binding;RNA binding		Mesodermal Commitment Pathway	5	20	0	6	9.493	8.37996e-13	0.868	0.873177		0	0	0	0	0	0	0.0440929	0.0378592	0.0377164	0.0427775	0.0468321	0.0503439	0	0.0715201	0	0	0	0	0	0	0	0	0	0.0361987
ASNA1	ATPase ASNA1	transport	cytoplasm;endoplasmic reticulum;membrane;nucleus	catalytic activity;metal ion binding;nucleotide binding;protein binding;transporter activity			6	6	6	6	0.908	0.922478	0.888	0.457159		0.671817	0.444839	0.556503	0.51693	0.700499	0.433295	0.939429	0.875671	0.827734	0.688237	0.702563	0.710742	0.49161	0.435983	0.575727	0.547383	0.519495	0.555912	0.68051	0.614298	0.412307	0.483274	0.502442	0.233172
ASNS	Asparagine synthetase [glutamine-hydrolyzing]	cell communication;metabolic process;regulation of biological process;response to stimulus	cytosol	catalytic activity;nucleotide binding;protein binding	Alanine, aspartate and glutamate metabolism; Metabolic pathways	Photodynamic therapy-induced unfolded protein response; Amino Acid metabolism	17	23	6	23	0.51	0.000101567	0.624	0.000122714		1.73279	0.937897	1.12782	2.8888	1.62593	1.3995	1.35048	0.454696	0.335329	1.84459	0.783129	0.944894	1.27347	0.736586	0.844899	0.436783	0.399072	0.213308	1.59677	0.683688	1.71507	2.08921	0.366931	0.555297
ASPH	Aspartyl/asparaginyl beta-hydroxylase	metabolic process;regulation of biological process;response to stimulus;transport	cytoplasm;endoplasmic reticulum;membrane;organelle lumen	catalytic activity;metal ion binding;protein binding;structural molecule activity			6	6	6	6	1.06	0.988928	1.102	0.962696		2.12076	2.27002	2.06691	1.70297	1.76879	2.34935	1.75071	2.01649	2.16613	1.80854	1.75352	2.14173	1.41834	1.38793	1.30022	1.10618	1.10628	1.34169	1.51358	1.7483	1.31083	1.46553	1.65003	2.32949
ASPSCR1	Isoform 2 of Tether containing UBX domain for GLUT4	regulation of biological process;transport	cytosol;membrane	protein binding			14	19	28	3	1.502	0.54576	1.223	0.948867		0	0	0	0.0483454	0.0514145	0.0479976	0.0458869	0.125978	0.0501397	0.0291	0.099949	0.0631749	0.0486748	0	0.0518473	0.0338965	0.0447117	0.0840748	0	0.0321244	0.0481049	0	0	0.0356203
ASS1	Argininosuccinate synthase	metabolic process;regulation of biological process;response to stimulus	cytoplasm;cytosol;mitochondrion	catalytic activity;nucleotide binding;protein binding;RNA binding	Biosynthesis of amino acids; Alanine, aspartate and glutamate metabolism; Metabolic pathways; Arginine biosynthesis	Amino Acid metabolism; Alanine and aspartate metabolism; Urea cycle and metabolism of amino groups	6	6	6	6	1.374	0.202648	0.899	0.589387		3.86424	3.88272	2.27701	4.35276	3.98367	2.41757	3.13553	3.61387	2.12651	4.34273	4.52483	3.07071	3.03512	3.28371	2.27767	3.01869	4.99647	2.8587	2.73477	3.36235	2.0593	4.10874	3.89768	3.43995
ATAD3A	ATPase family AAA domain-containing protein 3A	cell growth;regulation of biological process	membrane;mitochondrion	catalytic activity;nucleotide binding;RNA binding			17	10	18	6	1.302	0.654925	1.23	0.868233		0.101255	0	0.0818561	0.0763622	0.240928	0.457709	0.256328	0.367605	0.238192	0.163785	0.315609	0.290752	0.18514	0.212195	0.226314	0.0426494	0.0958062	0.0539274	0.116747	0.280784	0.143098	0.120147	0.399328	0.168429
ATG3	Ubiquitin-like-conjugating enzyme ATG3	cell communication;cell organization and biogenesis;metabolic process;regulation of biological process;response to stimulus;transport	cytoplasm;cytosol	catalytic activity;protein binding	Autophagy	Nanoparticle triggered autophagic cell death; Senescence and Autophagy in Cancer	6	6	6	6	1.073	0.979508	1.045	0.990978		0.262941	0.453179	0.4038	0.35811	0.272513	0.414776	0.375572	0.451089	0.390315	0.195797	0.352995	0.415756	0.331679	0.340866	0.408225	0.354676	0.349258	0.346186	0.295279	0.308343	0.282954	0.264858	0.265843	0.286737
ATIC	Bifunctional purine biosynthesis protein PURH	metabolic process;response to stimulus	cytosol;membrane;mitochondrion	catalytic activity;protein binding	One carbon pool by folate; Purine metabolism; Metabolic pathways; Antifolate resistance	One Carbon Metabolism	6	6	6	6	1.179	0.787055	1.092	0.97627		3.27051	2.94575	2.39899	2.681	2.5927	2.83399	2.79365	3.27923	2.74471	3.14013	3.51988	3.00491	2.92515	3.3062	3.16112	3.01537	3.28553	2.87269	2.05873	2.43146	2.3031	2.38686	2.27966	2.6722
ATM	Serine-protein kinase ATM	cell death;cell organization and biogenesis;metabolic process;regulation of biological process;response to stimulus;transport	cytoplasm;nucleus	catalytic activity;DNA binding;nucleotide binding;protein binding;transporter activity	Transcriptional misregulation in cancer; NF-kappa B signaling pathway; FoxO signaling pathway; p53 signaling pathway; HTLV-I infection; Homologous recombination; Platinum drug resistance; Cell cycle; Apoptosis; MicroRNAs in cancer	ATM Signaling Network in Development and Disease; Pathways Affected in Adenoid Cystic Carcinoma; ATM Signaling Pathway; TP53 Network; DNA Damage Response (only ATM dependent); Homologous recombination; Cell Cycle; Ovarian Infertility Genes; DNA IR-Double Strand Breaks (DSBs) and cellular response via ATM; Hematopoietic Stem Cell Gene Regulation by GABP alpha/beta Complex; DDX1 as a regulatory com…	18	28	26	18	20.876	8.91795e-17	16.574	1.00949e-16		0	0	0	0	0.0134212	0	0.00592099	0.0245848	0.0160357	0	0	0.0296987	0	0.0180256	0.0186913	0	0	0.0253447	0	0	0	0.041593	0.0498088	0.0245209
ATOX1	Copper transport protein ATOX1	transport		metal ion binding		Copper homeostasis	6	6	6	6	1.008	0.99965	1.026	0.948867		2.52209	2.11698	1.83911	1.91161	1.65929	2.03121	1	1.25597	1.29056	0.918425	0.727033	0.835229	1.10954	0.8482	1.10019	1.21917	0.90442	1.05343	0.890231	0.998816	0.818664	0.89239	0.692547	1.27101
ATP13A1	Manganese-transporting ATPase 13A1	cellular homeostasis;transport	endoplasmic reticulum;membrane	catalytic activity;metal ion binding;nucleotide binding;transporter activity			6	6	6	6	1.475	0.273532	0.98	0.917765		0.12444	0.191822	0.0980979	0.110214	0.151657	0.08511	0.0936152	0.123459	0.102524	0.127986	0.14277	0.110968	0.104783	0.169739	0.0927832	0.0766268	0.130335	0.0864265	0.05594	0.0960474	0.063703	0.0488338	0.0958426	0.080763
ATP1A1	Sodium/potassium-transporting ATPase subunit alpha-1	cell communication;cellular homeostasis;metabolic process;regulation of biological process;response to stimulus;transport	endoplasmic reticulum;endosome;Golgi;membrane	catalytic activity;metal ion binding;nucleotide binding;protein binding;transporter activity	Adrenergic signaling in cardiomyocytes; Protein digestion and absorption; Cardiac muscle contraction; Aldosterone-regulated sodium reabsorption; Thyroid hormone signaling pathway; cGMP-PKG signaling pathway; Gastric acid secretion; Thyroid hormone synthesis; cAMP signaling pathway; Insulin secretion; Salivary secretion; Proximal tubule bicarbonate reclamation; Carbohydrate digestion and absorptio…	Preimplantation Embryo	6	6	6	6	1.31	0.373932	1.27	0.530162		11.1247	21.171	19.2304	10.4015	13.8834	10.2355	15.4011	21.3657	16.6134	12.4063	16.6892	16.1869	19.4404	23.3603	22.9077	22.5472	19.7533	21.3495	15.8208	18.5029	16.9588	14.1839	15.9738	17.2635
ATP1B1	Sodium/potassium-transporting ATPase subunit beta-1	cell communication;cell organization and biogenesis;cellular component movement;cellular homeostasis;metabolic process;regulation of biological process;response to stimulus;transport	membrane	catalytic activity;enzyme regulator activity;metal ion binding;nucleotide binding;protein binding;transporter activity	Proximal tubule bicarbonate reclamation; Cardiac muscle contraction; cGMP-PKG signaling pathway; Carbohydrate digestion and absorption; Thyroid hormone synthesis; Thyroid hormone signaling pathway; Mineral absorption; Endocrine and other factor-regulated calcium reabsorption; Salivary secretion; Aldosterone-regulated sodium reabsorption; Adrenergic signaling in cardiomyocytes; cAMP signaling path…	Calcium Regulation in the Cardiac Cell	6	6	3	3	2.259	5.77477e-06	1.335	0.318669		1.15671	2.06717	1.70558	0.586001	0.708366	0.977174	0.941435	1.83996	1.05338	0.521397	0.835115	1.13253	1.35181	1.80079	2.59277	1.73286	1.73638	2.06504	0.647129	1.17217	0.733509	0.794841	0.892838	0.783359
ATP1B3	Sodium/potassium-transporting ATPase subunit beta-3	cell organization and biogenesis;cellular component movement;cellular homeostasis;regulation of biological process;transport	cytoplasm;membrane	catalytic activity;enzyme regulator activity;protein binding;transporter activity	cGMP-PKG signaling pathway; Salivary secretion; Thyroid hormone synthesis; Proximal tubule bicarbonate reclamation; cAMP signaling pathway; Carbohydrate digestion and absorption; Insulin secretion; Endocrine and other factor-regulated calcium reabsorption; Pancreatic secretion; Bile secretion; Mineral absorption; Adrenergic signaling in cardiomyocytes; Cardiac muscle contraction; Thyroid hormone …	Calcium Regulation in the Cardiac Cell	6	6	10	6	1.247	0.700939	1.21	0.786155		0.231872	0.270213	0.330068	0.242427	0.775022	0.275529	0.518391	0.61938	0.443071	0.28876	0.618667	0.59105	0.269086	0.297546	0.302418	0.316547	0.292013	0.364525	0.418184	0.48419	0.326331	0.367324	0.536444	0.619753
ATP2A2	Sarcoplasmic/endoplasmic reticulum calcium ATPase 2	cell organization and biogenesis;cellular homeostasis;regulation of biological process;response to stimulus;transport	endoplasmic reticulum;membrane	catalytic activity;metal ion binding;nucleotide binding;protein binding;transporter activity	Adrenergic signaling in cardiomyocytes; Dilated cardiomyopathy; Calcium signaling pathway; Alzheimer's disease; Thyroid hormone signaling pathway; Arrhythmogenic right ventricular cardiomyopathy (ARVC); Hypertrophic cardiomyopathy (HCM); Cardiac muscle contraction; cAMP signaling pathway; Pancreatic secretion; cGMP-PKG signaling pathway	Alzheimers Disease; Calcium Regulation in the Cardiac Cell; Endothelin Pathways; Arrhythmogenic Right Ventricular Cardiomyopathy; Myometrial Relaxation and Contraction Pathways	6	6	6	6	1.193	0.71634	1.005	0.948867		2.71085	3.73862	3.04475	4.21129	4.36189	2.91431	4.74951	4.81713	3.84578	5.56932	5.16691	4.04772	3.13621	3.58839	1.97033	3.68971	3.36861	2.47703	4.2238	3.81612	3.85316	4.82422	4.3942	4.31851
ATP2B4	Plasma membrane calcium-transporting ATPase 4	cellular component movement;cellular homeostasis;regulation of biological process;response to stimulus;transport	membrane	catalytic activity;enzyme regulator activity;metal ion binding;nucleotide binding;protein binding;transporter activity	Salivary secretion; cAMP signaling pathway; cGMP-PKG signaling pathway; Calcium signaling pathway; Adrenergic signaling in cardiomyocytes; Pancreatic secretion		6	6	6	6	0.939	0.915378	0.919	0.727757		3.97093	5.54548	5.76904	5.65813	5.21692	3.99882	5.92711	4.26264	4.78885	5.43747	4.22379	5.13395	6.22036	6.34806	4.11365	4.47861	4.65431	3.88184	5.69565	4.35939	5.31947	6.50554	4.45195	5.01933
ATP2C1	Isoform 7 of Calcium-transporting ATPase type 2C member 1	cell organization and biogenesis;cellular homeostasis;regulation of biological process;response to stimulus;transport	Golgi;membrane	catalytic activity;metal ion binding;nucleotide binding;signal transducer activity;transporter activity			4	3	3	23	2.404	8.54001e-05	1.602	0.206861		0.32627	0.669346	0.355586	0.2353	0.258232	0.190646	0.0723027	0.215013	0.0712349	0.353255	0.170005	0	0	0.147907	0.204539	0.0454216	0	0.0490885	0.0798127	0.238703	0.155939	0.0918134	0.189817	0.119054
ATP5A1	ATP synthase subunit alpha, mitochondrial	cell organization and biogenesis;metabolic process;regulation of biological process;transport	membrane;mitochondrion;organelle lumen	catalytic activity;nucleotide binding;protein binding;RNA binding;transporter activity	Alzheimer's disease; Metabolic pathways; Parkinson's disease; Oxidative phosphorylation; Huntington's disease	Oxidative phosphorylation; Electron Transport Chain	6	6	6	6	1.077	0.979508	1.125	0.941401		37.8167	32.959	43.1679	22.7467	31.5728	42.3171	28.5499	33.4106	29.931	23.3084	29.2873	28.613	30.4007	30.4943	37.131	23.8227	27.5544	26.1148	22.8616	27.4025	23.8347	19.02	26.1528	25.3936
ATP5B	ATP synthase subunit beta, mitochondrial	cell differentiation;cell organization and biogenesis;cellular homeostasis;metabolic process;regulation of biological process;transport	cell surface;membrane;mitochondrion;nucleus;organelle lumen	catalytic activity;nucleotide binding;protein binding;transporter activity	Oxidative phosphorylation; Alzheimer's disease; Huntington's disease; Parkinson's disease; Metabolic pathways	Oxidative phosphorylation; Electron Transport Chain	6	6	6	6	1.117	0.937168	1.204	0.757795		46.6642	36.5633	43.8316	24.3522	32.5658	38.9552	28.1046	33.7781	32.579	24.0423	29.574	31.7381	28.6187	30.0143	39.8876	26.16	28.2292	28.7675	20.3818	24.9235	23.0457	18.7626	26.3042	24.6304
ATP5C1	ATP synthase subunit gamma, mitochondrial	cell organization and biogenesis;metabolic process;transport	membrane;mitochondrion;organelle lumen	catalytic activity;RNA binding;transporter activity	Parkinson's disease; Oxidative phosphorylation; Metabolic pathways; Alzheimer's disease; Huntington's disease	Electron Transport Chain	6	0	6	6	0.93	0.943641	1.308	0.406525		0.444248	0.380988	0.600368	0.368676	0.499517	0.575328	0.617572	0.800059	0.695749	0.468191	0.621763	0.560736	0.463015	0.423323	0.739113	0.494511	0.521954	0.54762	0	0	0	0	0	0
ATP5D	ATP synthase subunit delta, mitochondrial	cell organization and biogenesis;metabolic process;response to stimulus;transport	membrane;mitochondrion;organelle lumen	catalytic activity;nucleotide binding;transporter activity	Alzheimer's disease; Huntington's disease; Oxidative phosphorylation; Parkinson's disease; Metabolic pathways	Electron Transport Chain; Oxidative phosphorylation	6	6	6	6	0.942	0.919157	1.329	0.344452		3.10774	2.48243	3.25222	2.08187	2.52731	3.8167	2.85379	3.36673	3.55177	2.235	3.12805	2.91472	2.41637	2.06165	3.17351	2.55367	2.52143	2.58387	2.44951	2.39726	2.38612	2.21321	2.65148	2.4953
ATP5F1	ATP synthase F(0) complex subunit B1, mitochondrial	cell organization and biogenesis;metabolic process;transport	membrane;mitochondrion;nucleus;organelle lumen	catalytic activity;protein binding;transporter activity	Parkinson's disease; Oxidative phosphorylation; Huntington's disease; Alzheimer's disease; Metabolic pathways	Electron Transport Chain; Oxidative phosphorylation	6	6	6	6	1.177	0.778478	1.181	0.840522		1.613	3.4269	3.86037	2.86175	3.66312	4.08635	3.08758	4.03002	3.36896	2.69825	3.17872	3.16785	3.24313	3.19412	3.5085	2.63271	2.78698	2.38506	5.56794	5.04243	4.60068	3.88689	4.73906	4.05146
ATP5H	ATP synthase subunit d, mitochondrial	cell organization and biogenesis;metabolic process;transport	cytosol;membrane;mitochondrion	catalytic activity;transporter activity	Huntington's disease; Alzheimer's disease; Oxidative phosphorylation; Parkinson's disease; Metabolic pathways	Electron Transport Chain; Oxidative phosphorylation	6	6	6	6	1.028	0.999882	1.255	0.584908		4.86401	3.86615	6.09333	3.83777	4.81997	6.86368	3.45916	4.27177	4.42323	3.35193	4.04315	4.00945	3.72568	3.52114	5.10186	3.95514	3.48476	4.85889	3.28641	3.71298	3.27704	2.86469	3.39422	3.33554
ATP5I	ATP synthase subunit e, mitochondrial	cell organization and biogenesis;metabolic process;transport	membrane;mitochondrion	catalytic activity;transporter activity	Metabolic pathways; Oxidative phosphorylation	Electron Transport Chain; Oxidative phosphorylation	6	6	6	6	1.013	0.99965	1.174	0.857653		2.9466	2.66987	2.92056	1.4518	2.07471	2.91009	1.9135	2.27665	2.3363	1.63249	1.95946	2.06987	1.55884	1.43052	2.0258	1.5905	1.5516	1.55761	1.9845	2.15673	2.04454	1.67464	2.20143	1.83369
ATP5J	Isoform 2 of ATP synthase-coupling factor 6, mitochondrial	cell organization and biogenesis;metabolic process;transport	membrane;mitochondrion	catalytic activity;transporter activity		Oxidative phosphorylation; Electron Transport Chain	10	6	3	6	1.506	0.074385	1.28	0.511103		1.3535	1.69154	0	0.234922	1.37403	0	0.790652	0.614031	0.937488	0.528598	0.689371	0.687594	0	0.229591	0.486467	0.229654	0.590813	0	1.53526	1.30407	1.44648	1.04615	1.41188	1.17314
ATP5O	ATP synthase subunit O, mitochondrial	cell organization and biogenesis;metabolic process;transport	membrane;mitochondrion;nucleus	catalytic activity;protein binding;transporter activity	Oxidative phosphorylation; Parkinson's disease; Metabolic pathways; Alzheimer's disease; Huntington's disease	Oxidative phosphorylation; Electron Transport Chain	6	6	6	6	1.166	0.811432	1.131	0.937175		2.48842	2.0816	2.39811	1.87959	2.08491	2.03455	1.59424	2.07015	1.76319	1.53672	2.06357	1.73009	1.65372	2.03838	2.02009	1.55542	1.73233	1.42079	1.22493	1.34551	1.33063	1.40547	1.86109	1.73442
ATP6V0A1	Isoform 3 of V-type proton ATPase 116 kDa subunit a isoform 1	cell organization and biogenesis;cellular homeostasis;metabolic process;regulation of biological process;response to stimulus;transport	cytosol;Golgi;membrane	catalytic activity;protein binding;transporter activity			3	17	6	6	1.101	0.977801	0.761	0.229253		0.214578	0.21874	0.243562	0.234927	0.330504	0.102645	0.233351	0.151307	0.107968	0.222206	0.253838	0.146244	0.345511	0.519495	0.323675	0.213745	0.233732	0.233886	0.179058	0.0737595	0.0829826	0.0880896	0.0278968	0.106412
ATP6V0D1	V-type proton ATPase subunit d 1	cell organization and biogenesis;cellular homeostasis;regulation of biological process;response to stimulus;transport	endosome;membrane	catalytic activity;protein binding;transporter activity			25	6	6	6	0.851	0.741969	0.852	0.527327		0.220548	0.233971	0.375904	0.371256	0.498686	0.428895	0.426655	0.345188	0.32514	0.247293	0.198356	0.266736	0.0701548	0.100963	0.204651	0.220108	0.213166	0.2833	0.754901	0.371012	0.568918	0.537768	0.348247	0.244423
ATP6V1A	V-type proton ATPase catalytic subunit A	cellular homeostasis;metabolic process;regulation of biological process;response to stimulus;transport	cytosol;membrane;mitochondrion	catalytic activity;nucleotide binding;transporter activity	Metabolic pathways; Collecting duct acid secretion; Oxidative phosphorylation; Phagosome; Synaptic vesicle cycle; Epithelial cell signaling in Helicobacter pylori infection; Vibrio cholerae infection; mTOR signaling pathway; Rheumatoid arthritis		6	6	6	6	0.944	0.919655	0.994	0.930766		3.47379	2.07776	1.85665	2.16935	2.12028	2.58413	2.55225	2.24657	2.19071	2.01262	2.12086	2.12082	2.58075	2.47913	2.70016	1.88752	2.22036	2.15048	2.93937	2.15395	2.30819	2.32443	1.99707	2.3768
ATP6V1B2	V-type proton ATPase subunit B, brain isoform	cellular homeostasis;metabolic process;regulation of biological process;response to stimulus;transport	cytoplasm;cytosol;membrane	catalytic activity;nucleotide binding;protein binding;transporter activity	Metabolic pathways; mTOR signaling pathway; Collecting duct acid secretion; Vibrio cholerae infection; Phagosome; Synaptic vesicle cycle; Rheumatoid arthritis; Epithelial cell signaling in Helicobacter pylori infection; Oxidative phosphorylation		6	6	6	6	0.929	0.917225	0.962	0.84981		1.97813	1.36201	1.64694	1.18565	1.06175	1.03467	1.35226	1.14124	1.22112	0.884512	1.05693	0.979198	1.51894	1.36229	1.47388	1.2405	1.24802	1.31626	1.34096	1.25268	1.1819	0.852238	0.929889	0.839356
ATP6V1G1	V-type proton ATPase subunit G 1	cellular homeostasis;regulation of biological process;response to stimulus;transport	cytosol;membrane	catalytic activity;protein binding;transporter activity	Oxidative phosphorylation; Synaptic vesicle cycle; Metabolic pathways; mTOR signaling pathway; Rheumatoid arthritis; Epithelial cell signaling in Helicobacter pylori infection; Collecting duct acid secretion; Vibrio cholerae infection; Phagosome	Osteoclast Signaling	6	6	6	6	0.781	0.481775	1.162	0.897444		0.312069	0.189107	0.274973	0.264261	0.182993	0.335706	0.329202	0.296364	0.345605	0.265589	0.263286	0.220958	0.224743	0.194372	0.291941	0.306618	0.284784	0.311838	0.363334	0.298363	0.37441	0.33574	0.311537	0.267142
ATXN10	Ataxin-10	cell organization and biogenesis	cytoplasm;cytosol;membrane	protein binding			10	6	15	6	1.105	0.968974	0.846	0.525624		0.375603	0.17147	0.0993871	0.0240928	0.184907	0.168118	0.183488	0.162564	0.121167	0.222676	0.225046	0.246133	0.031832	0.155404	0.113615	0.186508	0.310054	0.182748	0.145304	0.180178	0.124796	0.238719	0.222473	0.234133
ATXN2	Ataxin-2	cell organization and biogenesis;metabolic process;regulation of biological process;transport	cytoplasm;Golgi;membrane	protein binding;RNA binding		EGF/EGFR Signaling Pathway; Parkinsons Disease Pathway	25	6	6	6	0.948	0.945879	0.924	0.793581		0.35241	0.254918	0.341837	0.414901	0	0.243314	0.162521	0.265945	0.245012	0.382147	0.215745	0.205937	0.228598	0.0640461	0.113303	0.248688	0.250881	0.421129	0.097533	0.178362	0.255435	0.116837	0.300428	0.144686
ATXN2L	Ataxin-2-like protein	cell organization and biogenesis;regulation of biological process	cytoplasm;cytosol;membrane;nucleus	protein binding;RNA binding			6	23	6	6	0.92	0.910842	1.131	0.948867		1.12596	0.914862	1.01868	1.28594	1.32073	1.78525	1.05401	0.889969	0.93427	1.15243	1.06927	1.12279	0.827125	0.85246	0.89238	0.899122	0.658818	0.904698	1.54145	0.786922	1.23465	2.67322	1.02687	0.889554
B2M	Beta-2-microglobulin form pI 5.3 (Fragment)	response to stimulus	extracellular				6	6	18	6	0.856	0.55855	1.156	0.886635		1.11372	0.584036	1.3703	1.26208	1.71424	3.07998	2.40545	2.50233	3.10923	1.22459	2.77929	2.61144	3.76062	3.02955	3.56792	5.70652	5.45907	5.80433	4.26887	3.51579	4.08215	4.16619	4.29679	4.57349
BABAM1	BRISC and BRCA1-A complex member 1						0	6	23	6	0.487	0.02108	0.01	1.00949e-16		0.0354928	0	0	0.0383261	0	0	0.0954911	0.0443184	0.0705971	0.105783	0.0609436	0.115059	0	0	0	0	0	0	0.0674441	0.0679717	0	0.0462008	0	0.0562152
BAD	Bcl2-associated agonist of cell death	cell death;cell organization and biogenesis;cell proliferation;metabolic process;regulation of biological process;response to stimulus	cytoplasm;cytosol;membrane;mitochondrion	enzyme regulator activity;protein binding	Chronic myeloid leukemia; Tuberculosis; cAMP signaling pathway; Insulin signaling pathway; Pathways in cancer; Hepatitis C; Endometrial cancer; Focal adhesion; VEGF signaling pathway; EGFR tyrosine kinase inhibitor resistance; PI3K-Akt signaling pathway; cGMP-PKG signaling pathway; Thyroid hormone signaling pathway; Ras signaling pathway; Hepatitis B; ErbB signaling pathway; Alzheimer's disease; …	Kit receptor signaling pathway; Apoptosis; Oxidative Damage; IL-7 Signaling Pathway; PI3K-AKT-mTOR signaling pathway and therapeutic opportunities; Alzheimers Disease; Amyotrophic lateral sclerosis (ALS); Leptin signaling pathway; IL-4 Signaling Pathway; Focal Adhesion; IL-3 Signaling Pathway; TNF alpha Signaling Pathway; Focal Adhesion-PI3K-Akt-mTOR-signaling pathway; Rac1/Pak1/p38/MMP-2 pathway…	25	6	25	6	0.913	0.902869	0.65	0.0274617		0.146207	0.0895629	0.0764805	0.245072	0.188749	0.218489	0.102972	0.120999	0.15441	0.212092	0.128167	0.159136	0.143697	0.133429	0.0643001	0.303073	0.132448	0.237588	0.216865	0.201413	0.153109	0.137729	0.104978	0.13947
BAG2	BAG family molecular chaperone regulator 2	metabolic process;regulation of biological process	cytosol	enzyme regulator activity;nucleotide binding;protein binding	Protein processing in endoplasmic reticulum		6	6	6	6	0.889	0.867441	0.883	0.463727		0.609725	0.424756	0.456056	0.604225	0.674965	0.577469	0.840535	0.805438	0.825663	0.764336	0.868742	0.803436	0.813199	0.715059	0.386937	0.638952	0.963552	0.70163	0.772618	0.560397	0.887649	0.655485	0.803966	0.773405
BAG3	BAG family molecular chaperone regulator 3	cell death;metabolic process;regulation of biological process;response to stimulus	cytoplasm;cytosol;membrane;nucleus	enzyme regulator activity;nucleotide binding;protein binding			6	6	15	6	1.009	0.99965	0.91	0.630314		5.64828	2.56157	2.14128	2.58597	2.70414	1.91573	1.15562	1.33583	1.40131	1.92091	1.39918	1.37785	1.44041	1.60391	0.967258	3.24047	2.66393	1.38691	1.42793	1.23311	1.05002	0.975811	1.02104	0.931937
BANF1	Barrier-to-autointegration factor	cell organization and biogenesis;metabolic process;regulation of biological process;response to stimulus;transport	chromosome;cytoplasm;cytosol;nucleus	DNA binding;protein binding			6	4	17	25	0.992	0.99965	0.755	0.0966001		1.15428	0.59799	0.674675	0.396952	0.384791	0.365884	0.216405	0.174683	0.143091	0.527163	0.152031	0.356593	0.773923	0.742762	0.818956	0.686123	0.427684	0.641156	0.199126	0.362415	0.239462	0	0.0557537	0.0674197
BASP1	Brain acid soluble protein 1	cell differentiation;cell organization and biogenesis;regulation of biological process	cytoplasm;cytoskeleton;membrane;nucleus	DNA binding;protein binding			6	6	6	6	0.769	0.202098	0.948	0.836764		29.358	23.8231	20.6456	27.2306	24.2908	16.6417	25.5571	16.2556	23.7399	20.4352	16.6006	16.8506	14.8497	16.0143	10.504	15.2631	14.8732	12.4865	39.7123	30.6939	33.377	33.9399	26.8629	26.0973
BAX	Isoform Beta of Apoptosis regulator BAX	cell death;cell differentiation;cell organization and biogenesis;cell proliferation;cellular component movement;cellular homeostasis;metabolic process;regulation of biological process;response to stimulus;transport	cytoplasm;cytosol;endoplasmic reticulum;membrane;mitochondrion;nucleus	protein binding;transporter activity		Regulation of Apoptosis by Parathyroid Hormone-related Protein; Overview of nanoparticle effects; Nanomaterial induced apoptosis; miRNA Regulation of DNA Damage Response; DNA Damage Response; Amyotrophic lateral sclerosis (ALS); TP53 Network; TNF alpha Signaling Pathway; Rac1/Pak1/p38/MMP-2 pathway; Aryl Hydrocarbon Receptor Pathway; Integrated Breast Cancer Pathway; DNA Damage Response (only ATM…	6	6	6	6	0.964	0.951081	1.038	0.977301		2.17775	2.22602	2.38006	2.83812	2.02751	2.36081	2.27789	1.76506	2.32671	3.26497	2.42073	3.40234	2.51492	1.92751	2.31593	2.78797	1.95495	2.978	2.13075	1.9781	2.27716	2.82086	2.05197	3.36973
BAZ1B	Tyrosine-protein kinase BAZ1B	cell organization and biogenesis;metabolic process;regulation of biological process;response to stimulus	chromosome;nucleus	catalytic activity;metal ion binding;nucleotide binding;protein binding			19	16	14	25	0.01	8.91795e-17	100	1.00949e-16		0.0177325	0	0.0140635	0.00899049	0.0085902	0.00784255	0.00749905	0.0101205	0.02529	0.0295567	0.0299062	0.0283258	0	0	0.0122568	0	0	0.0091984	0	0	0.0107349	0.00742367	0.0171641	0.0419093
BCAM	Basal cell adhesion molecule	regulation of biological process;response to stimulus	cell surface;extracellular;membrane	protein binding;receptor activity;signal transducer activity			6	6	15	6	0.772	0.724335	0.524	0.0141011		0.0218185	0	0	0.0118473	0.0129899	0	0.0363413	0.0439632	0.0572245	0.0513835	0.0433837	0.0255803	0.0855186	0.0559882	0.0228255	0.112283	0.0715864	0.115375	0.0779972	0.0734299	0.0647111	0.0566357	0.0503135	0.0922943
BCAP29	Isoform 2 of B-cell receptor-associated protein 29	cell death;cell differentiation;cellular component movement;metabolic process;transport	endoplasmic reticulum;membrane	catalytic activity;nucleotide binding			17	6	6	6	1.14	0.93977	0.968	0.886319		0.104645	0.26846	0.264732	0	0.366196	0.275241	0.411166	0.336617	0.318651	0.135472	0.212305	0.389534	0.212648	0.120692	0.131611	0.0702767	0	0.11526	0.393272	0.449889	0.447998	0.160553	0.456647	0.335804
BCAP31	Isoform 2 of B-cell receptor-associated protein 31	cellular homeostasis;regulation of biological process;response to stimulus;transport	cytosol;endoplasmic reticulum;membrane;mitochondrion	protein binding			6	6	6	6	1.094	0.957557	1.047	0.990978		7.6658	12.9584	10.3608	9.9126	12.895	10.8666	8.01937	8.5358	6.93135	8.16166	8.59957	6.75695	8.71979	11.0464	9.94175	6.74439	9.13663	7.28436	9.6158	10.7065	8.78773	8.72859	9.97228	6.5215
BCAR1	Isoform 6 of Breast cancer anti-estrogen resistance protein 1	cell division;cell organization and biogenesis;cell proliferation;cellular component movement;regulation of biological process;response to stimulus	cytoplasm;cytoskeleton;cytosol;membrane	protein binding;signal transducer activity		Chemokine signaling pathway; VEGFA-VEGFR2 Signaling Pathway; TGF-beta Signaling Pathway; Integrin-mediated Cell Adhesion; miR-509-3p alteration of YAP1/ECM axis; EGF/EGFR Signaling Pathway; Focal Adhesion; Regulation of Actin Cytoskeleton	3	0	0	28	100	8.91795e-17	100	1.00949e-16		0	0	0	0	0	0	0	0	0	0.0481161	0.0483156	0.0459036	0	0.0463346	0.0274751	0.0137924	0.0234872	0.0223291	0	0	0	0	0	0
BCAS2	Pre-mRNA-splicing factor SPF27	cell organization and biogenesis;metabolic process	nucleus;spliceosomal complex	protein binding	Spliceosome		24	6	6	6	1.07	0.99965	1.045	0.978079		0.196388	0.115389	0.126402	0.131018	0.121275	0.0891502	0.157578	0.170738	0.162407	0.16043	0.148274	0.206698	0	0.0144384	0	0	0.0579031	0.0153293	0.152769	0.154352	0.173952	0.15157	0.149425	0.20644
BCL2L2	Isoform 3 of Bcl-2-like protein 2	cell proliferation;metabolic process;regulation of biological process;response to stimulus;transport	cytoplasm;cytosol;membrane;nucleus	protein binding;RNA binding		Photodynamic therapy-induced NF-kB survival signaling; mRNA Processing; Apoptosis	6	6	6	6	0.824	0.658308	1.158	0.935691		0.309335	0.152977	0.233499	0.13944	0.103032	0.270573	0.172404	0.318845	0.40153	0.487351	0.122805	0.183328	0.378107	0.313944	0.401027	0.27524	0.28894	0.332198	0.218981	0.297006	0.250847	0.206725	0.302614	0.360684
BCL9L	B-cell CLL/lymphoma 9-like protein	cell differentiation;metabolic process;regulation of biological process;response to stimulus	nucleus	protein binding			0	8	0	0			100	1.00949e-16		0	0	0	0	0	0	0	0	0	0	0	0	0	0	0	0	0	0	0	0	0.0263695	0	0	0
BCLAF1	Bcl-2-associated transcription factor 1	cell death;metabolic process;regulation of biological process;response to stimulus	cytoplasm;nucleus	DNA binding;protein binding;RNA binding		Interactome of polycomb repressive complex 2 (PRC2)	6	6	6	6	0.911	0.92321	1.031	0.964062		0.612412	0.543783	0.832853	0.840563	0.653437	0.675223	0.740825	0.726974	0.852729	0.922906	0.69052	1.13887	0.563704	0.388272	0.128249	0.686808	0.582759	0.700215	0.646382	0.750284	0.593197	0.828817	0.649942	0.925264
BDH2	3-hydroxybutyrate dehydrogenase type 2	cell differentiation;metabolic process	cytoplasm;cytosol;mitochondrion	catalytic activity;nucleotide binding	Metabolic pathways; Synthesis and degradation of ketone bodies; Butanoate metabolism		6	6	6	6	1.219	0.74204	1.41	0.125977		0.193301	0.425187	0.596972	0.58939	0.577035	0.708296	0.754532	0.87487	1.06293	0.26852	0.892004	0.925125	0.665515	0.631203	1.15241	1.1758	1.06025	1.32187	0.569382	0.615839	0.590019	0.87971	0.868259	1.25556
BGN	Biglycan	cell organization and biogenesis;metabolic process;regulation of biological process;response to stimulus	cell surface;cytoplasm;extracellular;membrane;organelle lumen	enzyme regulator activity;protein binding;structural molecule activity			6	6	6	6	0.781	0.477593	1.169	0.873177		0.839746	0.595533	0.753483	0.619192	0.646189	0.710496	0.700284	0.578336	1.08354	0.534073	0.698219	0.845835	0.610993	0.354104	0.406532	0.545431	0.486615	0.617994	0.569872	0.515682	0.980355	0.491259	1.35005	1.21826
BICC1	Protein bicaudal C homolog 1	development;regulation of biological process	cytoplasm	protein binding;RNA binding			24	4	18	6	4.172	1.44997e-11	2.462	0.000482029		0.0538526	0.0568683	0.0447797	0	0	0.0728767	0.136462	0.284045	0.173442	0.220568	0.179488	0.301781	0.103137	0.139833	0.052995	0.17696	0.786805	0.171414	0	0.180665	0.149361	0	0	0
BID	Isoform 2 of BH3-interacting domain death agonist	cell death;cell organization and biogenesis;metabolic process;regulation of biological process;response to stimulus;transport	cytoplasm;cytosol;membrane;mitochondrion	protein binding		Alzheimers Disease; miRNA Regulation of DNA Damage Response; Photodynamic therapy-induced HIF-1 survival signaling; Apoptosis Modulation by HSP70; TNF alpha Signaling Pathway; Nanomaterial induced apoptosis; TP53 Network; DNA Damage Response; Amyotrophic lateral sclerosis (ALS); Apoptosis; Regulation of Apoptosis by Parathyroid Hormone-related Protein	6	11	25	6	0.937	0.940772	0.96	0.873177		0.0898359	0	0.106288	0.169104	0.0967955	0.0953605	0.206096	0.179849	0.189563	0.289171	0.182966	0.246778	0.121447	0.120144	0.101524	0.122269	0.0695701	0.119796	0	0.0917997	0	0	0.05825	0
BLVRA	Biliverdin reductase A	metabolic process	cytoplasm;cytosol	catalytic activity;metal ion binding;protein binding	Porphyrin and chlorophyll metabolism		6	6	6	6	0.967	0.980274	0.961	0.836764		0.554156	0.419489	0.489256	0.583211	0.533188	0.409479	0.680228	0.627953	0.702229	0.624805	0.605531	0.592317	0.661222	0.642167	0.538072	0.581554	0.556091	0.56096	0.495042	0.493462	0.525474	0.49815	0.518557	0.488458
BLVRB	Flavin reductase (NADPH)	metabolic process;transport	cytoplasm;cytosol;membrane	catalytic activity	Porphyrin and chlorophyll metabolism; Riboflavin metabolism	NRF2 pathway	6	6	6	6	0.708	0.0574947	1	0.948867		6.22592	3.82594	4.88786	4.95195	2.98678	4.28794	4.81048	4.07426	4.75569	4.69728	3.24468	4.43081	4.9453	3.21482	5.85978	6.87769	4.98572	6.77409	1.9438	1.68217	1.84087	2.09362	0.998167	1.90027
BPGM	Bisphosphoglycerate mutase	metabolic process;regulation of biological process	cytosol	catalytic activity	Glycine, serine and threonine metabolism; Glycolysis / Gluconeogenesis; Metabolic pathways		6	14	14	15	0.355	2.69818e-07	0.788	0.186055		0.449519	0.13815	0.362077	0.322805	0.140303	0.329192	0.456362	0.116365	0.201786	0.261913	0.0885399	0.171294	0.461311	0.126984	0.309447	0.329608	0.203599	0.315786	0.53937	0.135897	0.438099	0.403801	0.0996784	0.2641
BPNT1	3'(2'),5'-bisphosphate nucleotidase 1	metabolic process	cytosol	catalytic activity;metal ion binding	Metabolic pathways; Sulfur metabolism		6	6	6	6	1.018	0.99965	1.395	0.373858		0.0817154	0.149876	0	0.0847687	0.187599	0.231912	0.26574	0.324945	0.366557	0.290624	0.322658	0.384761	0.184016	0.198323	0.330496	0.305856	0.324886	0.317385	0.268665	0.239081	0.289185	0.257524	0.258902	0.367979
BSG	Basigin	cell organization and biogenesis;cellular component movement;metabolic process;regulation of biological process;response to stimulus;transport	membrane;mitochondrion	protein binding;transporter activity		Matrix Metalloproteinases	6	6	6	6	1.23	0.597302	0.829	0.252958		1.84662	2.02191	1.42822	3.69077	3.94148	1.92072	2.69489	2.59342	2.38474	4.42525	3.67236	3.10624	3.16729	4.42322	2.13282	3.01508	3.14389	3.23671	1.96279	2.50425	1.43607	2.94019	2.75143	2.31944
BST1	ADP-ribosyl cyclase/cyclic ADP-ribose hydrolase 2			catalytic activity		NAD+ biosynthetic pathways	6	6	6	6	0.796	0.303382	1.008	0.948867		9.26965	7.50634	9.32964	8.23904	7.06528	6.96754	8.31338	9.28204	7.99756	8.04204	7.10327	8.76855	4.34811	3.70476	3.78543	4.75846	4.31007	5.32277	7.90737	9.14555	7.63844	8.36824	6.87952	9.87921
BUB3	Mitotic checkpoint protein BUB3	cell division;cell organization and biogenesis;metabolic process;regulation of biological process	chromosome;cytosol;nucleus	protein binding	Cell cycle; HTLV-I infection	Cell Cycle	6	6	6	6	1.048	0.99965	1.138	0.928229		2.15808	2.7147	3.97821	2.6821	2.57649	2.6429	2.46353	2.29303	2.49919	3.56857	2.6391	2.77367	2.02113	1.5262	1.93626	2.21219	1.79278	2.22503	2.48487	2.6117	2.50719	2.79907	2.24224	2.40616
BZW1	Isoform 3 of Basic leucine zipper and W2 domain-containing protein 1	metabolic process;regulation of biological process	cytoplasm;membrane	protein binding;RNA binding			6	6	6	6	1.238	0.619705	1.148	0.918713		0.543955	0.702518	0.82971	1.32411	1.28406	1.16946	1.12154	1.67308	1.43909	1.32909	1.58615	1.70263	1.07117	1.13817	0.907214	1.02102	1.06308	1.19292	1.24899	1.1572	1.04726	1.7802	1.64049	2.07889
C11orf54	Ester hydrolase C11orf54		nucleus	catalytic activity;metal ion binding;protein binding			6	6	17	6	0.813	0.753383	1.349	0.748362		0.126918	0.0379092	0.0728757	0.0431926	0.0430395	0.0541803	0.0421851	0.0527187	0.0828634	0.0522368	0.048614	0.0902172	0.205699	0.181882	0.252086	0.151918	0.246455	0.203712	0.0875553	0.0767414	0.103074	0.0710944	0.0679759	0.133402
C12orf10	UPF0160 protein MYG1, mitochondrial	response to stimulus	mitochondrion;nucleus				6	6	6	6	0.987	0.997483	1.035	0.97627		0.488817	0.379949	0.386891	0.399537	0.48505	0.628479	0.385353	0.489889	0.386541	0.443826	0.426351	0.486942	0.810679	0.746488	0.800889	0.696663	0.59226	0.297275	0.460677	0.51124	0.467265	0.452982	0.359058	0.550588
C14orf166	UPF0568 protein C14orf166	metabolic process;regulation of biological process;transport	cytoplasm;cytoskeleton;cytosol;nucleus	protein binding;RNA binding			3	6	6	6	1.096	0.960003	0.808	0.197464		0.6636	0.368361	0.261267	0.339709	0.319326	0.33515	0.552762	0.540376	0.489348	0.81209	0.73581	0.750702	1.2227	1.45092	0.965911	0.469378	0.93058	0.606228	0.425031	0.435316	0.488919	0.227246	0.289009	0.608833
C19orf10	UPF0556 protein C19orf10	cell death;regulation of biological process	extracellular;organelle lumen	protein binding			10	6	6	6	1.166	0.827905	1.109	0.948867		8.31263	12.0149	7.54754	5.1676	9.29299	7.48815	3.82338	6.1884	5.36353	3.67235	6.86862	4.47519	4.19874	7.48176	3.78225	3.13778	9.05896	3.24511	3.13884	9.14598	6.8105	3.37121	7.46071	5.85282
C19orf43	Uncharacterized protein C19orf43			protein binding			10	23	28	17	2.057	0.000115519	1.013	0.948867		0	0	0	0.194099	0.125132	0.299762	0.494832	0.763047	0.595621	0.140062	0.108523	0.124175	0	0.0649814	0.058003	0.0500754	0.138079	0.0438398	1.50639	3.21406	1.52336	4.23349	1.54359	1.22047
C1orf123	UPF0587 protein C1orf123						6	6	6	6	0.887	0.805989	1.07	0.998665		1.25677	0.657956	0.941565	0.979748	1.01112	1.14597	1.26232	1.63315	1.79729	1.0363	1.33156	1.60015	1.21127	0.92654	1.07516	1.21776	1.21215	1.38931	1.07483	1.1465	1.12212	1.12156	1.07323	1.74791
C1orf198	Uncharacterized protein C1orf198		cytoplasm;cytosol				6	6	6	6	0.794	0.293184	0.836	0.321982		5.1361	4.03042	3.55274	5.91599	5.49636	3.98481	5.936	4.07273	5.15039	6.39913	5.52846	5.6471	5.64852	8.66411	4.00717	6.39138	7.64737	6.07414	7.05485	4.90429	5.90564	4.80848	3.94395	4.4356
C9orf64	UPF0553 protein C9orf64	metabolic process					6	25	6	6	0.951	0.954157	1.195	0.822887		0.319538	0.151207	0.208567	0.33175	0.18145	0.240357	0.433563	0.390925	0.560831	0.385556	0.354816	0.583051	0.376655	0.232767	0.430056	0.478411	0.37383	0.462169	0.195892	0.282381	0.424749	0.495232	0.346872	0.621609
CACNA2D1	Voltage-dependent calcium channel subunit alpha-2/delta-1	cellular homeostasis;regulation of biological process;transport	endoplasmic reticulum;membrane	metal ion binding;transporter activity	Adrenergic signaling in cardiomyocytes; Arrhythmogenic right ventricular cardiomyopathy (ARVC); Cardiac muscle contraction; Dilated cardiomyopathy; Hypertrophic cardiomyopathy (HCM); MAPK signaling pathway; Oxytocin signaling pathway	Arrhythmogenic Right Ventricular Cardiomyopathy	6	25	18	6	1.039	0.99965	1.064	0.990978		5.11492	5.13758	5.10204	8.96461	5.36699	18.1298	4.60949	5.35168	4.47065	6.5242	3.75844	7.89736	6.21981	4.63293	6.27293	5.36166	3.35351	5.41754	6.37124	5.67442	6.41565	10.4817	4.89742	13.4255
CACYBP	Calcyclin-binding protein	cell differentiation;regulation of biological process;response to stimulus	cytoplasm;cytosol;nucleus	protein binding	Wnt signaling pathway	Gastric cancer network 2	6	6	6	6	0.911	0.881363	1.02	0.948867		1.88699	1.57006	1.74447	2.17943	1.44763	2.0646	2.01107	1.89791	1.90102	2.18836	2.03518	2.28807	1.61214	1.42993	1.69588	2.06723	1.43535	1.91697	1.76304	1.55282	1.81728	2.26491	1.87924	1.95267
CAD	CAD protein	metabolic process	cytoplasm;cytosol;membrane;nucleus	catalytic activity;metal ion binding;nucleotide binding;protein binding	Alanine, aspartate and glutamate metabolism; Metabolic pathways; Pyrimidine metabolism	Amino Acid metabolism; Endothelin Pathways	6	6	14	6	1.061	0.988928	1.041	0.979172		0.99813	0.170742	0.907662	0.414414	0.3624	0.500261	0.414728	0.500857	0.400897	0.628611	0.61024	0.511992	0.644234	0.558194	0.545013	0.382235	0.492606	0.483667	0.404367	0.375682	0.479373	0.635893	0.706921	0.697941
CALB2	Calretinin	cellular homeostasis	cytoplasm;cytosol;nucleus	metal ion binding			28	18	28	28	3.444	1.56355e-05	0.01	1.00949e-16		0.053763	0.0882922	0	0.347461	0.302154	0.157862	0	0.168022	0	0.46551	0.420122	0.299635	0.0150869	0.747459	0.0384996	1.48195	1.8429	1.24731	0.0432051	0.0829209	0	0.0644959	0.0645626	0.145181
CALD1	Isoform 4 of Caldesmon	cellular component movement	cytoskeleton;cytosol;membrane	protein binding		Myometrial Relaxation and Contraction Pathways	6	6	6	6	0.916	0.842675	0.901	0.64339		757.022	723.571	616.121	857.016	834.794	419.635	630.568	334.003	510.909	802.017	509.913	489.687	928.997	883.608	632.47	1024.11	1006.39	1127.75	887.09	819.853	846.071	791.991	555.652	473.378
CALM2	Calmodulin			metal ion binding;protein binding		Alzheimers Disease	4	4	4	1	1.311	0.405069	2.957	2.20926e-15		0.10103	1.85705	1.34195	0.147433	0.052898	0.742298	0.561704	3.89028	0.800637	0.126603	0.274965	0.689681	0	1.68584	1.41712	0.392808	0.350807	0.205343	0.123138	2.94601	1.18475	0.578762	0.257986	0.124707
CALR	Calreticulin	cell differentiation;cell organization and biogenesis;cellular homeostasis;metabolic process;regulation of biological process;response to stimulus;transport	cell surface;cytoplasm;cytosol;endoplasmic reticulum;extracellular;Golgi;membrane;nucleus;organelle lumen	DNA binding;metal ion binding;protein binding;RNA binding	Protein processing in endoplasmic reticulum; Phagosome; Chagas disease (American trypanosomiasis); Antigen processing and presentation; HTLV-I infection	Photodynamic therapy-induced unfolded protein response; Androgen receptor signaling pathway; Calcium Regulation in the Cardiac Cell	6	6	6	6	1.023	0.99965	0.972	0.899633		64.288	66.1639	64.8941	78.4236	93.019	84.1184	61.0355	59.0338	63.873	63.6027	78.1194	60.8421	60.2892	56.8538	50.0955	58.4553	64.8494	58.2401	61.0497	68.1513	52.5192	67.6537	74.9761	62.6494
CALU	Isoform 3 of Calumenin	metabolic process	endoplasmic reticulum;extracellular;Golgi;membrane;organelle lumen	metal ion binding;protein binding		NOTCH1 regulation of human endothelial cell calcification	6	6	6	6	0.791	0.285812	0.362	4.38384e-15		34.5503	25.1986	9.86154	37.8908	27.6905	12.7887	22.7398	15.3284	10.2442	19.3569	24.294	16.8926	34.979	22.7297	5.38411	26.3723	22.4083	31.3883	37.7486	35.9751	26.3911	47.2249	38.1417	31.0183
CAMK2D	Calcium/calmodulin-dependent protein kinase type II subunit delta	cell differentiation;cell organization and biogenesis;cellular component movement;cellular homeostasis;metabolic process;regulation of biological process;response to stimulus	cytoplasm;cytosol;endoplasmic reticulum;membrane;nucleus	catalytic activity;nucleotide binding;protein binding	HIF-1 signaling pathway; Tuberculosis; Axon guidance; Insulin secretion; Gastric acid secretion; Circadian entrainment; Proteoglycans in cancer; Neurotrophin signaling pathway; Glucagon signaling pathway; Cholinergic synapse; Dopaminergic synapse; Glioma; GnRH signaling pathway; ErbB signaling pathway; Oocyte meiosis; Oxytocin signaling pathway; Wnt signaling pathway; cAMP signaling pathway; Infl…	Cardiac Hypertrophic Response; Physiological and Pathological Hypertrophy of the Heart; Myometrial Relaxation and Contraction Pathways; SRF and miRs in Smooth Muscle Differentiation and Proliferation; MicroRNAs in cardiomyocyte hypertrophy; Calcium Regulation in the Cardiac Cell	6	6	6	6	0.976	0.968434	1.159	0.873177		10.1478	10.1547	10.095	6.91392	6.33809	7.82732	7.98119	8.157	8.61337	7.54391	5.97344	7.67652	11.7723	9.66569	12.7466	10.8791	9.83714	11.1914	7.40676	8.01407	7.9468	7.47478	7.12022	8.97163
CAND1	Cullin-associated NEDD8-dissociated protein 1	cell differentiation;cell organization and biogenesis;cellular homeostasis;metabolic process;regulation of biological process;transport	cytoplasm;cytosol;extracellular;Golgi;membrane;nucleus;organelle lumen	protein binding		Endoderm Differentiation	6	6	6	6	1.055	0.996539	1.145	0.917084		2.37853	3.02355	2.91127	2.48897	3.01234	2.5779	3.72874	3.79825	3.8301	3.9995	3.9905	3.98772	3.38076	2.96793	3.19037	3.44415	3.38016	3.74539	3.60238	3.48347	3.3766	4.87315	3.86236	5.23791
CANX	Calnexin	metabolic process;regulation of biological process;response to stimulus;transport	endoplasmic reticulum;membrane;organelle lumen;ribosome	metal ion binding;protein binding;RNA binding			6	6	6	6	1.125	0.928239	1.097	0.957215		9.03563	9.05277	7.32357	8.04183	9.38735	7.34718	8.02296	7.48736	6.60127	8.56996	10.0024	7.47989	7.68514	9.22116	6.43284	5.43377	8.06611	5.8953	8.83259	8.80867	8.33246	8.53924	9.40836	8.10089
CAP1	Adenylyl cyclase-associated protein 1	cell organization and biogenesis;cellular component movement;regulation of biological process;response to stimulus;transport	cytoplasm;cytoskeleton;extracellular;membrane;organelle lumen	protein binding		Insulin Signaling; Angiopoietin Like Protein 8 Regulatory Pathway	6	6	6	6	1.066	0.988928	1.001	0.948867		36.6373	44.7219	35.4147	39.814	46.524	31.3826	33.5128	33.6604	33.2096	34.0948	34.2905	28.5738	36.4069	41.0824	32.2648	28.4746	39.1902	29.3502	36.298	42.8716	38.1672	29.5918	33.3006	25.0945
CAP2	Adenylyl cyclase-associated protein 2	cell organization and biogenesis;regulation of biological process;response to stimulus	cytoskeleton;membrane	protein binding		Aryl Hydrocarbon Receptor Pathway; Ectoderm Differentiation	6	6	6	6	0.796	0.420615	0.764	0.0261729		1.50433	1.47637	0.819455	1.19337	0.600248	0.633163	0.7353	0.525441	0.308967	1.19741	0.854163	0.972709	1.03622	0.573038	0.690845	0.909887	0.894648	1.09989	1.12507	0.934376	1.42598	1.47027	0.955663	1.1812
CAPG	Macrophage-capping protein	cell organization and biogenesis;regulation of biological process	cytoplasm;extracellular;nucleus	protein binding		TYROBP Causal Network	25	25	25	6	1.679	0.04116	1.213	0.784857		0.451984	0.520462	0.4092	0.986869	0.928974	1.60643	1.16835	2.86251	1.97638	1.8893	2.76806	2.75582	0.33733	0.561517	0.340438	1.39474	1.3098	0.841369	0.304145	0.747997	0.468442	0.948355	1.26436	1.64096
CAPN1	Calpain-1 catalytic subunit	cell death;cell organization and biogenesis;metabolic process;regulation of biological process;transport	cytoplasm;cytosol;extracellular;membrane;mitochondrion;vacuole	catalytic activity;metal ion binding;protein binding	Apoptosis; Alzheimer's disease; Protein processing in endoplasmic reticulum	Integrin-mediated Cell Adhesion; Focal Adhesion; Alzheimers Disease	6	6	6	6	1.213	0.691833	1.046	0.990978		3.3681	4.05752	3.75425	3.43814	3.77368	3.16291	4.33454	5.29693	4.58381	4.51017	5.21869	5.22274	4.38464	4.77358	4.29564	4.22254	4.68126	4.8585	3.48804	4.58273	3.94464	3.8186	3.73148	5.07414
CAPN2	Calpain-2 catalytic subunit	cell organization and biogenesis;metabolic process;regulation of biological process;response to stimulus	chromosome;cytoplasm;cytoskeleton;cytosol;endoplasmic reticulum;Golgi;membrane;nucleus;vacuole	catalytic activity;metal ion binding;protein binding	Focal adhesion; Alzheimer's disease; Protein processing in endoplasmic reticulum; Apoptosis	Alzheimers Disease; Integrin-mediated Cell Adhesion; VEGFA-VEGFR2 Signaling Pathway	6	6	6	6	1.098	0.954161	1.211	0.730708		12.0605	11.2699	14.4796	12.9578	12.5277	13.3668	15.0359	16.5629	15.5163	14.8796	13.9865	17.342	15.1776	13.9746	15.6749	14.0505	13.9613	14.8531	14.4019	17.3721	15.4782	18.2	13.7772	20.9076
CAPNS1	Calpain small subunit 1	cell death;cell organization and biogenesis;metabolic process;regulation of biological process	cytoplasm;cytosol;membrane	catalytic activity;metal ion binding;protein binding		Integrin-mediated Cell Adhesion	6	6	6	6	1.072	0.983333	1.089	0.971032		4.48964	4.88714	5.32318	4.94725	4.69384	5.65369	5.96825	7.42496	6.80768	6.13371	6.77609	7.61776	5.70394	5.80758	6.57347	5.99739	6.54609	6.3696	6.60007	7.31694	6.52038	7.81841	7.08134	8.70773
CAPRIN1	Caprin-1	cell differentiation;regulation of biological process	cytoplasm;cytosol;membrane	protein binding;RNA binding			6	6	6	6	0.935	0.886951	1.241	0.661911		2.95418	2.45755	3.39038	4.07437	3.03278	4.4682	2.50012	3.02943	3.18497	3.58847	3.37747	3.86409	2.6085	2.3057	2.51743	2.82975	2.72249	3.18195	3.76734	3.41214	3.11664	3.57912	4.08249	4.20281
CAPS	Calcyphosin	regulation of biological process;response to stimulus	cytoplasm	metal ion binding			6	6	6	6	1.127	0.925154	1.039	0.972026		1	0.373205	0.797649	0.857774	0.495649	0.975375	0.834059	0.952714	0.871142	1.06961	0.925482	1.16537	0.817415	0.776822	0.747115	1.11189	0.837203	1.12881	0.445478	0.557592	0.487003	0.723226	0.536362	0.902901
CAPZA1	F-actin-capping protein subunit alpha-1	cell organization and biogenesis;cellular component movement;coagulation;defense response;regulation of biological process;response to stimulus;transport	cytoplasm;cytoskeleton;cytosol;extracellular	protein binding	Endocytosis		6	6	6	6	0.98	0.976614	1.129	0.935691		6.51078	5.26078	5.70945	6.4071	7.10074	5.90268	6.03868	6.44504	6.06392	6.01217	5.87974	6.45387	6.68599	6.69123	6.75234	6.95713	6.68023	7.32398	5.26295	5.71736	5.4169	5.92038	5.0681	5.53178
CAPZA2	F-actin-capping protein subunit alpha-2	cell organization and biogenesis;cellular component movement;coagulation;defense response;regulation of biological process;response to stimulus;transport	cytoskeleton;cytosol;extracellular;membrane	protein binding	Endocytosis		6	6	6	6	1.054	0.99965	1.007	0.948867		3.46641	2.53807	2.31623	2.31202	2.42075	2.10723	2.88789	2.7733	2.94954	3.13257	3.05598	2.99408	2.45294	2.67426	2.42643	2.33586	2.63469	2.56633	2.76594	2.86506	2.68533	3.01414	2.82838	2.89447
CAPZB	Capping protein (Actin filament) muscle Z-line, beta, isoform CRA_d	cell organization and biogenesis;cellular component movement;coagulation;regulation of biological process;transport	cytoplasm;cytoskeleton;cytosol;membrane	protein binding			6	6	6	6	1.044	0.99965	1.024	0.972026		20.9388	20.5857	16.2367	17.0142	19.166	15.0643	17.7215	18.2066	17.4603	18.1418	17.1939	17.9965	18.0066	17.5663	16.3968	16.6244	16.2095	16.8883	17.2504	15.8408	15.5088	16.2742	14.2633	15.2762
CARS	Isoform 3 of Cysteine--tRNA ligase, cytoplasmic	metabolic process	cytoplasm;cytosol	catalytic activity;metal ion binding;nucleotide binding;protein binding;RNA binding			6	6	6	6	0.774	0.193352	0.91	0.64052		2.26364	2.02926	1.99789	3.57801	2.55284	1.74906	2.7922	1.95016	1.83443	3.27823	1.96791	2.21588	2.48249	2.13465	2.0678	1.60024	1.37789	1.53306	3.77916	2.92972	2.87962	3.70822	2.12918	2.15863
CASP3	Caspase-3	cell death;cell differentiation;metabolic process;regulation of biological process;response to stimulus	cytoplasm;cytosol;membrane;nucleus	catalytic activity;enzyme regulator activity;protein binding	Huntington's disease; Herpes simplex infection; Amoebiasis; Proteoglycans in cancer; Tuberculosis; Natural killer cell mediated cytotoxicity; Epithelial cell signaling in Helicobacter pylori infection; Hepatitis B; p53 signaling pathway; Viral carcinogenesis; Apoptosis; Apoptosis - multiple species; Platinum drug resistance; MAPK signaling pathway; Amyotrophic lateral sclerosis (ALS); Pertussis; …	Prolactin Signaling Pathway; Copper homeostasis; MAPK Signaling Pathway; Spinal Cord Injury; Apoptosis; Alzheimers Disease; miRNA Regulation of DNA Damage Response; Sudden Infant Death Syndrome (SIDS) Susceptibility Pathways; Brain-Derived Neurotrophic Factor (BDNF) signaling pathway; Parkinsons Disease Pathway; Oxidative Damage; AGE/RAGE pathway; Hepatitis C and Hepatocellular Carcinoma; Apoptos…	6	14	6	6	0.76	0.380785	1.15	0.948867		0.169721	0.123434	0.196586	0.201626	0.174565	0.197418	0.293739	0.298179	0.35809	0.201185	0.236461	0.297771	0.25114	0.195567	0.19238	0.169955	0.187591	0.186952	0.189662	0.145762	0.189536	0.182894	0	0.259762
CAST	Isoform 6 of Calpastatin	regulation of biological process	cytosol;endoplasmic reticulum;membrane	enzyme regulator activity;protein binding;RNA binding			6	6	6	6	1.02	0.99965	1.115	0.948867		6.14153	4.1506	6.58349	6.50974	4.72732	7.29603	4.62123	6.33684	5.13707	5.13355	3.78792	5.02859	3.66721	3.47056	6.09904	7.7882	3.95904	5.41123	7.32146	8.93226	6.76378	8.3707	5.54718	5.45945
CAT	Catalase	cell differentiation;cell organization and biogenesis;metabolic process;regulation of biological process;response to stimulus;transport	cytosol;endoplasmic reticulum;extracellular;Golgi;membrane;mitochondrion;organelle lumen;vacuole	antioxidant activity;catalytic activity;metal ion binding;nucleotide binding;protein binding	Glyoxylate and dicarboxylate metabolism; Longevity regulating pathway - multiple species; FoxO signaling pathway; Tryptophan metabolism; Amyotrophic lateral sclerosis (ALS); Carbon metabolism; Peroxisome; Longevity regulating pathway	DNA Damage Response (only ATM dependent); Tryptophan metabolism; Folate Metabolism; Amyotrophic lateral sclerosis (ALS); Oxidative Stress; Selenium Micronutrient Network	6	6	6	6	1.051	0.996539	1.019	0.948867		1.84233	1.5233	1.51151	1.0636	1.37852	1.27381	1.94254	1.79933	2.29941	1.62028	1.63079	1.21172	0.701029	0.954074	0.7618	0.670335	0.839775	0.754317	1.1024	0.889679	0.702705	0.695851	0.950399	0.834775
CAV1	Caveolin-1	cell communication;cell differentiation;cell organization and biogenesis;cellular component movement;cellular homeostasis;metabolic process;regulation of biological process;response to stimulus;transport	endoplasmic reticulum;endosome;Golgi;membrane	enzyme regulator activity;protein binding;structural molecule activity	Bacterial invasion of epithelial cells; Endocytosis; Viral myocarditis; Focal adhesion; Proteoglycans in cancer	VEGFA-VEGFR2 Signaling Pathway; TGF-beta Signaling Pathway; Integrin-mediated Cell Adhesion; EGF/EGFR Signaling Pathway; Focal Adhesion; Androgen receptor signaling pathway	6	25	25	6	1.236	0.620479	1.301	0.432012		2.70874	4.52617	6.35676	7.23186	6.98073	9.94277	6.97637	7.45825	6.28204	7.33435	6.72349	9.14873	6.82009	6.29219	11.4325	13.9055	11.2575	14.5059	8.27886	8.27819	9.18681	21.0181	12.4542	15.5177
CBR1	Carbonyl reductase [NADPH] 1	cell differentiation;metabolic process	cytoplasm;cytosol	catalytic activity	Chemical carcinogenesis; Metabolism of xenobiotics by cytochrome P450; Metabolic pathways; Arachidonic acid metabolism	NRF2 pathway	6	6	6	6	1.05	0.99965	1.165	0.870748		4.77785	3.15952	3.37321	3.33651	3.0513	3.01063	4.09152	4.50065	4.43036	3.82113	3.35159	4.47944	4.29982	4.5644	5.08313	3.62163	4.29653	4.56262	3.00089	3.23893	3.27674	2.89867	2.28946	3.88902
CBR3	Carbonyl reductase [NADPH] 3	metabolic process	cytoplasm;cytosol	catalytic activity;nucleotide binding;protein binding	Metabolic pathways; Arachidonic acid metabolism; Metabolism of xenobiotics by cytochrome P450	NRF2 pathway	14	14	17	14	0.322	7.36384e-09	0.954	0.873756		0.259664	0.15804	0.246529	0	0.0600882	0.189069	0.286262	0.0268043	0.238823	0.106831	0.0855315	0.134558	0.129252	0	0.0934446	0.121584	0	0.0991154	0.217873	0.146988	0.182574	0.15418	0	0.30275
CBX1	Chromobox protein homolog 1	regulation of biological process	chromosome;nucleus	protein binding			6	18	9	25	0.108	8.91795e-17	1.409	0.503397		0.109537	0	0.0612016	0.334431	0.09793	0.402527	0.175794	0.0462851	0.226636	0.278461	0.242511	0.276331	0.207939	0	0.259346	0.32366	0.324341	0.178696	0	0.0254887	0.0791799	0	0.0848219	0.17684
CBX3	Chromobox protein homolog 3	cell organization and biogenesis;metabolic process;regulation of biological process	chromosome;membrane;nucleus	protein binding		Exercise-induced Circadian Regulation	6	6	6	6	0.888	0.719569	1.326	0.362576		2.86427	1.90439	3.70277	2.84811	2.57743	4.89132	2.61817	3.03452	2.98781	3.32268	3.10681	4.12033	2.76789	2.20862	3.55449	3.45887	2.21017	3.47548	2.66478	2.79289	3.07666	3.37048	3.32491	3.50392
CBX5	Chromobox protein homolog 5	coagulation;regulation of biological process	chromosome;nucleus	protein binding			25	6	6	6	0.841	0.715993	1.087	0.979172		1.13969	0.509641	1.03608	0.87457	0.533881	0.464024	0.519538	0.488157	0.632175	0.92309	0.615816	1.01527	0.388937	0.477213	0.412051	0.886907	0.628234	0.964321	0.417896	0.455086	0.40696	0.726869	0.578388	0.701608
CCAR1	Cell division cycle and apoptosis regulator protein 1	cell death;metabolic process;regulation of biological process	cytoplasm	DNA binding;protein binding;RNA binding			19	19	3	19	0.923	0.940895	2.188	0.000608299		0.0677761	0.147992	0.0742578	0.0496265	0	0.085737	0.143831	0.0639889	0.542322	0	0.301603	0.125678	0.0453612	0	0.16742	0.043529	0.0795519	0.0326157	0	0.126579	0.323532	0.137503	0.117885	0.147678
CCAR2	Cell cycle and apoptosis regulator protein 2	cell death;cell organization and biogenesis;metabolic process;regulation of biological process;response to stimulus	cytoplasm;nucleus;organelle lumen;spliceosomal complex	enzyme regulator activity;protein binding;RNA binding			6	6	6	6	1.05	0.993781	1.394	0.142931		0.762198	0.600422	0.912431	0.601505	0.637656	0.957879	0.903512	0.917736	0.878534	0.883682	0.80279	1.11009	0.585796	0.526124	1.1973	0.658852	0.467212	0.799706	0.649356	0.727502	0.945696	0.783438	0.918549	0.947299
CCBL2	Kynurenine--oxoglutarate transaminase 3	metabolic process	mitochondrion	catalytic activity;protein binding;RNA binding	Tryptophan metabolism; Selenocompound metabolism; Metabolic pathways; Chemical carcinogenesis		6	6	6	6	1.231	0.729006	1.238	0.723237		0.577812	0.38454	0.395433	0.330682	0.327701	0.399255	0.478369	0.557636	0.517809	0.538293	0.578434	0.645146	0.469851	0.530213	0.427823	0.312098	0.550287	0.402679	0.32087	0.513806	0.4027	0.324304	0.382078	0.395154
CCDC102A	Coiled-coil domain-containing protein 102A			catalytic activity;motor activity			6	18	18	14	0.949	0.976614	0.968	0.901455		0.0802088	0.0339897	0.153162	0.0514918	0.108285	0.410402	0.327399	0.0483927	0.281423	0.134236	0.0954366	0.351789	0.122944	0.0630055	0.09264	0.144674	0.132259	0.189517	0.146618	0.163064	0.24425	0.028452	0.146242	0.362593
CCDC124	Coiled-coil domain-containing protein 124	cell division	cytoplasm;cytoskeleton	RNA binding			6	6	6	6	0.905	0.880397	0.883	0.438155		1.0378	0.857084	0.862677	0.972842	0.734666	1.13727	0.732934	0.737637	0.80462	0.848311	0.715991	0.922825	0.987763	0.524737	0.784971	0.849486	0.74091	0.962506	0.907911	0.843275	0.716936	1.02608	0.832978	0.96428
CCDC22	Coiled-coil domain-containing protein 22	cellular homeostasis;metabolic process;regulation of biological process;transport	cytosol;endosome	protein binding			6	6	6	6	0.882	0.925154	1.009	0.948867		0.0880194	0.0566093	0.061837	0.0523055	0.0390953	0.048954	0.0686669	0.0706252	0.0724845	0.0986129	0.0536869	0.0729498	0.0919376	0.0999034	0.0934089	0.0562725	0.080556	0.0770406	0.0470821	0.0429925	0.0549344	0.04093	0.0302512	0.0588154
CCDC47	Coiled-coil domain-containing protein 47	cell differentiation;cell organization and biogenesis;metabolic process;regulation of biological process;response to stimulus	endoplasmic reticulum;membrane	metal ion binding;protein binding;RNA binding			6	6	6	6	1.143	0.900218	1.051	0.984917		1.31822	1.54794	1.4547	1.45541	1.27764	1.44308	1.44759	1.42245	1.37358	1.41207	1.37611	1.67855	1.10418	1.32245	1.22378	0.882861	1.04354	1.03409	1.53636	1.59222	1.13886	1.39541	1.34629	1.47361
CCDC50	Isoform 2 of Coiled-coil domain-containing protein 50		cytosol	protein binding			6	6	6	6	0.959	0.949593	0.918	0.712475		1.986	1.61905	1.27269	1.55233	0.906961	1.00301	1.88986	1.76406	1.18602	1.4608	0.999602	0.920358	1.03941	0.95287	0.448613	0.802197	0.888762	1.27156	2.52041	2.91851	1.49982	1.68219	1.35474	1.45855
CCDC6	Coiled-coil domain-containing protein 6	cell organization and biogenesis;metabolic process	cytoplasm;cytoskeleton;cytosol	protein binding;structural molecule activity	Thyroid cancer; Pathways in cancer	Mesodermal Commitment Pathway; Retinoblastoma (RB) in Cancer	6	6	6	6	1.209	0.833962	0.811	0.3382		0.316668	0.224557	0.183159	0.229383	0.346198	0.281529	0.444781	0.276328	0.270257	0.27322	0.434961	0.335959	0.340367	0.389987	0.202592	0.280969	0.373956	0.31863	0.344567	0.322861	0.202105	0.252224	0.325288	0.251826
CCDC80	Isoform 2 of Coiled-coil domain-containing protein 80	cell organization and biogenesis;regulation of biological process		protein binding			6	14	6	6	0.607	0.0115358	1.204	0.783809		0.710555	0.699284	1.38477	1.26359	1.03839	0.942133	0.939747	0.569749	0.882974	0.727063	0.376609	0.43253	1.3746	0.841316	1.30178	0.913143	0.618553	1.12369	0.934716	0.169262	0.842005	0.522335	0.387451	0.873489
CCDC86	Coiled-coil domain-containing protein 86		nucleus	protein binding;RNA binding			0	12	18	10	1.161	0.961233	100	1.00949e-16		0	0	0.059131	0.0544953	0.0448313	0.119947	0.037125	0.0638564	0	0.0382981	0.0824587	0	0	0	0	0	0	0	0	0	0.0430643	0.0684088	0.0367549	0
CCNYL1	Cyclin-Y-like protein 1	cellular component movement;regulation of biological process	membrane	protein binding			6	6	6	6	1.359	0.282869	1.025	0.948867		1.09574	1.47582	1.02258	0.789186	0.84178	0.878306	1.0064	1.29251	0.944192	1.05208	0.905848	0.90195	1.00286	0.831226	0.91028	1.32586	0.900212	1.07368	0.740849	1.00257	0.728583	1.04425	0.744841	1.15262
CCS	Copper chaperone for superoxide dismutase	metabolic process;regulation of biological process;response to stimulus;transport	cytoplasm;cytosol;nucleus	antioxidant activity;catalytic activity;enzyme regulator activity;metal ion binding;protein binding	Amyotrophic lateral sclerosis (ALS)	Amyotrophic lateral sclerosis (ALS); Copper homeostasis	14	25	14	6	0.09	8.91795e-17	0.974	0.914748		0.167075	0	0.110783	0.0984984	0.0781978	0.176189	0.179093	0.140827	0.199751	0.113799	0.101693	0.132029	0.181382	0	0.22955	0.184469	0.118301	0.2315	0.103169	0.0829681	0.125545	0.157319	0.134402	0.260747
CCT2	T-complex protein 1 subunit beta	cell organization and biogenesis;metabolic process;regulation of biological process;transport	cytoplasm;cytosol;extracellular;organelle lumen	nucleotide binding;protein binding			6	6	6	6	0.993	0.982961	1.063	0.991793		8.60683	7.5758	7.19213	5.8769	5.78368	6.43111	6.2029	6.02596	6.15936	6.35147	5.94002	5.86421	6.9062	6.67849	6.87707	4.35247	6.28359	4.59122	6.27876	5.71673	5.83628	6.5088	5.70608	6.1068
CCT3	T-complex protein 1 subunit gamma	cell organization and biogenesis;metabolic process;regulation of biological process;transport	cytoplasm;cytoskeleton;cytosol;membrane	nucleotide binding;protein binding;RNA binding			6	6	6	6	1.077	0.979508	1.04	0.984475		10.267	9.50433	8.99801	9.01778	9.00988	8.32979	7.677	7.98549	9.25817	9.10391	7.87889	8.8504	9.10881	10.0122	9.21676	6.37358	7.28325	6.77834	6.14854	8.91751	8.26095	6.92939	6.86899	6.5268
CCT4	T-complex protein 1 subunit delta	metabolic process;regulation of biological process;transport	cytoplasm;cytoskeleton;cytosol	nucleotide binding;protein binding;RNA binding			6	6	6	6	0.999	0.988928	1.048	0.991793		8.64446	7.92294	8.09851	8.82978	8.03806	9.29197	6.63069	7.53668	7.72932	6.95317	6.49551	6.73001	9.11318	5.91881	6.74833	5.20756	5.50475	7.89728	8.20539	7.70214	7.43076	8.40079	7.12691	7.40675
CCT5	T-complex protein 1 subunit epsilon	metabolic process;regulation of biological process;response to stimulus;transport	cytoplasm;cytoskeleton;cytosol	nucleotide binding;protein binding;RNA binding			6	6	6	6	0.937	0.905554	1.121	0.948767		15.6764	25.1747	21.2503	28.1573	33.2362	19.6703	13.7566	13.1666	12.9961	21.2951	17.4677	16.9202	18.6691	19.8177	14.7849	19.9529	16.276	21.126	15.6559	11.7279	12.1971	18.5444	14.2287	13.385
CCT6A	T-complex protein 1 subunit zeta	metabolic process;regulation of biological process	cytoplasm;cytosol;membrane	nucleotide binding;protein binding;RNA binding			6	6	6	6	0.962	0.940895	1.104	0.948867		10.9798	9.5802	10.7196	11.1958	10.2645	12.9289	9.22173	10.046	10.114	10.5117	7.70119	8.70681	9.46132	7.93181	9.45799	8.78839	8.01171	7.85842	6.80807	9.69822	6.9109	11.8317	8.6622	8.77222
CCT7	T-complex protein 1 subunit eta	metabolic process;regulation of biological process;transport	cytoplasm;cytosol;mitochondrion	nucleotide binding;protein binding			6	6	6	6	1.108	0.940895	1.059	0.99692		4.49873	4.27915	4.64324	5.66088	4.57221	5.23977	4.08292	4.63562	4.15024	4.26715	4.21548	4.49118	4.40958	4.75623	4.26526	3.52753	3.72058	3.72787	2.30385	3.87709	2.43859	2.65345	2.50501	4.19167
CCT8	T-complex protein 1 subunit theta	cell organization and biogenesis;metabolic process;regulation of biological process;transport	cytoplasm;cytoskeleton;cytosol;extracellular;organelle lumen	catalytic activity;nucleotide binding;protein binding			6	6	6	6	1.06	0.993143	1.123	0.942158		5.93836	5.78728	5.70931	7.8832	7.2729	7.09218	7.48696	7.73431	7.43785	6.75436	7.47159	7.94139	6.13424	6.55938	6.45864	5.74995	6.12438	6.13489	7.18981	6.76569	6.61843	8.12536	8.07727	7.58345
CD14	Monocyte differentiation antigen CD14	cell death;defense response;regulation of biological process;response to stimulus;transport	cell surface;extracellular;Golgi;membrane	protein binding;receptor activity;signal transducer activity	Hematopoietic cell lineage; Transcriptional misregulation in cancer; NF-kappa B signaling pathway; Amoebiasis; Toll-like receptor signaling pathway; Phagosome; Tuberculosis; Legionellosis; MAPK signaling pathway; Regulation of actin cytoskeleton; Pathogenic Escherichia coli infection; Salmonella infection; Pertussis	Pathogenic Escherichia coli infection; MAPK Signaling Pathway; Regulation of Actin Cytoskeleton; Regulation of toll-like receptor signaling pathway; Toll-like receptor signaling pathway	25	25	6	6	1.37	0.433604	1.804	0.00166485		0.162699	0.273511	0.222463	0.231244	0.239592	0.220936	0.147586	0.190005	0.321561	0.077827	0.16134	0.200184	0.826706	0.307771	0.806012	1.6254	0.801404	2.04399	0.35956	0.519746	0.749416	0.777563	0.78095	1.36306
CD2BP2	CD2 antigen cytoplasmic tail-binding protein 2	cell organization and biogenesis;metabolic process;regulation of biological process	cytoplasm;cytosol;nucleus	protein binding		mRNA Processing	6	18	6	6	0.819	0.700939	0.945	0.85862		0.132405	0.0961717	0.167673	0.0867671	0.0994545	0.180132	0.10889	0.10668	0.0927436	0.104914	0.111265	0.132103	0.283667	0.194586	0.105784	0.261204	0.240572	0.250108	0.00859446	0.00623589	0.00971978	0	0	0.0156485
CD3EAP	Isoform 2 of DNA-directed RNA polymerase I subunit RPA34	metabolic process;regulation of biological process;response to stimulus	chromosome;cytosol;mitochondrion;nucleus	catalytic activity;RNA binding			0	5	19	18	100	8.91795e-17	6.04	1.93814e-14		0.0819808	0	0.174923	0.0462401	0	0.0455623	0	0.0264577	0.0569079	0.0304237	0	0.0867487	0	0	0	0	0	0	0	0.158485	0	0	0	0
CD44	CD44 antigen	cell organization and biogenesis;cellular component movement;metabolic process;regulation of biological process;response to stimulus;transport	cell surface;cytosol;Golgi;membrane	protein binding;receptor activity;signal transducer activity	Shigellosis; MicroRNAs in cancer; Proteoglycans in cancer; ECM-receptor interaction; Epstein-Barr virus infection; Hematopoietic cell lineage	Hepatitis C and Hepatocellular Carcinoma; Wnt Signaling Pathway and Pluripotency; Senescence and Autophagy in Cancer	6	6	6	6	0.764	0.185521	1.154	0.881819		17.1119	13.8325	18.7709	14.0501	11.5791	14.0063	16.4101	11.8263	15.5725	13.0952	9.1694	12.7427	16.94	12.0664	14.6086	12.1919	8.3191	13.5498	16.5923	12.6344	16.916	19.2505	11.2577	18.3186
CD47	Leukocyte surface antigen CD47	cell organization and biogenesis;cellular component movement;regulation of biological process;response to stimulus;transport	membrane	protein binding;receptor activity;signal transducer activity	ECM-receptor interaction	Spinal Cord Injury	6	6	6	6	0.811	0.343551	1.156	0.891649		1.54258	1.3493	2.31453	1.5042	1.56469	1.57213	2.67967	2.11158	2.29069	2.28261	1.85509	2.13464	3.14235	2.58381	4.30497	4.38102	2.95608	3.69168	3.64577	1.98504	2.65657	2.87762	1.9227	2.35934
CD59	CD59 glycoprotein	regulation of biological process					6	6	6	6	1.237	0.614987	1.406	0.153051		13.7469	18.4123	22.2601	10.257	12.7424	19.2027	16.8719	20.4853	19.2269	10.6866	12.1064	16.0222	23.2833	23.206	33.793	24.5765	21.623	26.8595	15.8891	15.051	16.746	13.7184	12.2898	14.305
CD9	CD9 antigen (Fragment)		membrane				6	6	6	6	1.399	0.379239	1.31	0.619106		0.123133	0.166826	0.252542	0.281194	0	0.153735	0.291153	0.394118	0.25121	0.314969	0.36187	0.367979	0.48228	0.633664	0.53257	0.549634	0.455922	0.528805	0.254058	0.405246	0.318226	0.451338	0.42724	0.443347
CD99	CD99 antigen	regulation of biological process	cytoplasm;membrane	protein binding	Leukocyte transendothelial migration; Cell adhesion molecules (CAMs)		6	6	6	6	1.237	0.596608	0.878	0.484863		3.94356	5.33743	2.87845	4.8331	3.88597	3.05319	2.16764	2.29521	1.75306	1.89678	2.00326	1.51462	2.12696	2.9895	2.0689	2.56026	2.65341	1.31766	6.371	6.64598	5.7986	6.44948	7.15602	4.16341
CDC37	Hsp90 co-chaperone Cdc37	cell division;metabolic process;regulation of biological process;response to stimulus;transport	cytoplasm;cytosol	catalytic activity;enzyme regulator activity;protein binding	PI3K-Akt signaling pathway	Aryl Hydrocarbon Receptor Pathway; TNF alpha Signaling Pathway; Simplified Interaction Map Between LOXL4 and Oxidative Stress Pathway; Aryl Hydrocarbon Receptor; Focal Adhesion-PI3K-Akt-mTOR-signaling pathway	6	6	6	6	1.025	0.99965	1.04	0.984475		6.07503	5.99448	6.01547	6.44646	5.78927	6.17	5.56355	5.49573	6.00586	6.38138	4.82819	6.3193	5.73567	5.60652	4.8416	5.46571	5.42984	6.21551	6.23514	5.86747	5.19966	5.53806	5.09453	4.76575
CDC42	Cell division control protein 42 homolog	cell communication;cell differentiation;cell division;cell organization and biogenesis;cellular component movement;coagulation;metabolic process;regulation of biological process;response to stimulus;transport	cytoplasm;cytoskeleton;cytosol;membrane;vacuole	catalytic activity;nucleotide binding;protein binding	Endocytosis; Renal cell carcinoma; GnRH signaling pathway; MAPK signaling pathway; Bacterial invasion of epithelial cells; Neurotrophin signaling pathway; Regulation of actin cytoskeleton; Shigellosis; Tight junction; Proteoglycans in cancer; Epithelial cell signaling in Helicobacter pylori infection; Viral carcinogenesis; AGE-RAGE signaling pathway in diabetic complications; Ras signaling pathwa…	Chemokine signaling pathway; MAPK Signaling Pathway; Metastatic brain tumor; Focal Adhesion; Integrated Breast Cancer Pathway; Androgen receptor signaling pathway; DNA Damage Response (only ATM dependent); Regulation of Actin Cytoskeleton; Brain-Derived Neurotrophic Factor (BDNF) signaling pathway; RalA downstream regulated genes; Leptin signaling pathway; G13 Signaling Pathway; Oxidative Damage;…	3	6	6	6	1.007	0.996539	0.852	0.406525		4.52634	5.86725	5.1589	1.53684	4.19449	3.95199	4.8908	4.5468	4.26964	2.0758	3.81697	4.58235	7.5361	7.98636	4.83863	2.24625	7.38033	2.91821	8.25159	5.85996	5.38861	1.87621	6.72302	5.30417
CDC42BPA	Isoform 6 of Serine/threonine-protein kinase MRCK alpha	cell organization and biogenesis;cellular component movement;metabolic process;regulation of biological process;response to stimulus;transport	cytoplasm;cytoskeleton;extracellular;Golgi	catalytic activity;metal ion binding;motor activity;nucleotide binding;protein binding;structural molecule activity			0	0	21	25	0.01	8.91795e-17	1.302	0.90017		0	0	0	0.0156244	0	0	0.0250466	0	0.0321626	0.0367968	0.0258629	0.0246944	0	0	0	0	0	0	0	0	0	0	0	0
CDC42BPB	Serine/threonine-protein kinase MRCK beta	cell organization and biogenesis;cellular component movement;metabolic process;regulation of biological process;response to stimulus;transport	cytoplasm;cytoskeleton;extracellular;Golgi;membrane	catalytic activity;metal ion binding;motor activity;nucleotide binding;protein binding;structural molecule activity			6	6	6	6	0.997	0.99965	0.997	0.929428		0.632675	1.10229	1.05642	0.869699	0.857216	0.375075	0.768267	0.737026	0.637408	0.91639	0.719724	0.762376	0.740829	0.662323	0.540041	0.59788	0.525378	0.648655	0.727136	0.836767	0.713065	0.723589	0.775037	0.751821
CDC42EP1	Cdc42 effector protein 1	cell organization and biogenesis;regulation of biological process;response to stimulus	cytoplasm;cytoskeleton;membrane	enzyme regulator activity;protein binding			6	6	17	6	0.734	0.290222	1.055	0.990027		1.50799	0.490616	0.729592	0.703508	0.263702	0.594506	0.672616	0.297537	0.587359	0.893291	0.555796	0.791148	0.778539	0.600325	0.810174	0.728206	0.660286	0.802348	0.410735	0.446492	0.533459	0.366834	0.340049	0.522582
CDC42EP4	Cdc42 effector protein 4	cell organization and biogenesis;regulation of biological process;response to stimulus	cytoplasm;cytoskeleton;membrane	enzyme regulator activity;protein binding;RNA binding			6	6	3	6	1.676	0.0541893	2.026	0.000912067		0.296896	0.603106	0.193923	0.0340271	0.102175	0.162018	0.166674	0.272858	0.338748	0.107039	0.275062	0.184669	0.155117	0.16253	0.334395	0.147756	0.216769	0.319556	0.0759631	0.183936	0.144494	0.0683332	0.117419	0.186276
CDC5L	Cell division cycle 5-like protein	cell differentiation;cell organization and biogenesis;metabolic process;regulation of biological process;response to stimulus	cytoplasm;membrane;nucleus;spliceosomal complex	DNA binding;protein binding;RNA binding	Spliceosome		6	6	6	6	1.068	0.985438	1.381	0.277701		0.216445	0.431191	0.713026	0.306556	0.36045	0.400299	0.595523	0.569499	0.722992	0.482393	0.457246	0.528936	0.228642	0.390301	0.512547	0.274074	0.515576	0.350338	0.354638	0.228808	0.396475	0.367485	0.29089	0.360225
CDH11	Cadherin-11	cell organization and biogenesis	cytoplasm;membrane	metal ion binding			25	6	18	25	1.217	0.933655	2.737	0.000485314		0	0.0762191	0.138079	0.152659	0.0751828	0.308477	0.0636436	0.0738065	0.0600636	0.172113	0.163851	0.197658	0.0238391	0.0501602	0.120915	0.118684	0.0576984	0.133868	0.0332746	0.0389697	0.039627	0.0712411	0.064715	0.0514057
CDH13	Isoform 4 of Cadherin-13	cell organization and biogenesis;cell proliferation;cellular component movement;regulation of biological process;response to stimulus	cytoplasm;extracellular;membrane	metal ion binding;protein binding			19	6	19	18	0.617	0.02329	2.122	1.49238e-06		0.763391	0.354639	5.37338	1.25724	0.923643	4.05615	0.928572	0.714667	0.787693	0.975688	0.788273	2.01521	1.1338	0.910788	5.35433	1.11138	0.905632	1.2653	0.663483	0.482066	0.618494	0.880754	0.515963	0.67785
CDK11B	Cyclin-dependent kinase 11B	cell death;cell proliferation;metabolic process;regulation of biological process	cytoplasm;nucleus	catalytic activity;nucleotide binding;protein binding;RNA binding			6	6	14	6	0.704	0.218944	0.834	0.460662		0.177617	0	0.118732	0.14975	0.136758	0.170068	0.093267	0.193138	0.176556	0.150031	0.143819	0.189975	0.134796	0.0668697	0.0415386	0.128295	0.0788705	0.145494	0.229323	0.0966348	0.0982892	0.185228	0.178658	0.196222
CDK5	Cyclin-dependent kinase 5	cell communication;cell death;cell differentiation;cell division;cell growth;cell organization and biogenesis;cell proliferation;cellular component movement;metabolic process;regulation of biological process;response to stimulus;transport	cytoplasm;cytoskeleton;cytosol;membrane;nucleus	catalytic activity;nucleotide binding;protein binding	Alzheimer's disease; Axon guidance; Cocaine addiction	Alzheimers Disease; DNA Damage Response; Nicotine Activity on Dopaminergic Neurons; ATM Signaling Network in Development and Disease; miRNA Regulation of DNA Damage Response; Brain-Derived Neurotrophic Factor (BDNF) signaling pathway	6	6	6	6	1.15	0.897707	1.134	0.929428		0.471425	0.677036	0.638142	0.773266	0.65472	0.544921	0.61501	0.840252	0.730098	0.791072	0.844783	0.779871	0.617088	0.661497	0.64099	0.733797	0.709961	0.788298	0.571916	0.698445	0.557029	0.864477	0.740554	0.961444
CDK5RAP3	CDK5 regulatory subunit-associated protein 3	cell organization and biogenesis;cell proliferation;metabolic process;regulation of biological process;response to stimulus	cytoplasm;cytosol;membrane;nucleus	protein binding			6	6	6	6	1.101	0.976614	1.314	0.483989		0.22891	0.225151	0.345281	0.331942	0.361442	0.323475	0.391922	0.449562	0.428199	0.349694	0.39409	0.410955	0.331315	0.388917	0.408357	0.369018	0.45374	0.385876	0.233066	0.22424	0.242702	0.255406	0.249946	0.281707
CDK6	Cyclin-dependent kinase 6	cell differentiation;cell division;metabolic process;regulation of biological process;response to stimulus	cytoplasm;cytoskeleton;cytosol;nucleus	catalytic activity;nucleotide binding;protein binding	MicroRNAs in cancer; Small cell lung cancer; Glioma; Breast cancer; Hepatitis B; p53 signaling pathway; Chronic myeloid leukemia; Cell cycle; Pancreatic cancer; Measles; Viral carcinogenesis; Melanoma; Pathways in cancer; Non-small cell lung cancer; PI3K-Akt signaling pathway	Wnt Signaling Pathway Netpath; G1 to S cell cycle control; Metastatic brain tumor; DNA Damage Response; miRNAs involved in DNA damage response; Cell Cycle; Signaling Pathways in Glioblastoma; miRNA Regulation of DNA Damage Response; Retinoblastoma (RB) in Cancer	27	10	10	11	100	8.91795e-17				0	0.0561706	0	0.060191	0.0484648	0	0	0.0355112	0	0	0.0448482	0.017949	0	0.066358	0	0.108605	0.0980936	0	0	0.058347	0	0.0542747	0.0664899	0
CDKN2AIP	CDKN2A-interacting protein	regulation of biological process;response to stimulus	nucleus	protein binding;RNA binding			0	0	20	6	1.304	0.854449	1.831	0.317311		0	0	0	0	0	0.0364522	0.0265148	0.0329497	0.0478778	0	0.0361848	0.0334661	0	0	0	0	0	0	0	0	0	0	0	0
CDV3	Protein CDV3 homolog	cell proliferation	cytoplasm				6	6	6	6	0.915	0.829856	0.856	0.375121		2.73075	2.44796	2.13434	2.70311	4.34946	2.99736	2.39937	2.36379	2.33028	2.68137	2.51701	2.65039	1.73475	2.85989	1.13956	1.75112	2.28731	1.81644	2.40133	2.56211	2.36361	2.65247	2.16205	2.27266
CEMIP	Cell migration-inducing and hyaluronan-binding protein	metabolic process;regulation of biological process	cytoplasm;endoplasmic reticulum;extracellular;membrane;nucleus	catalytic activity;protein binding			6	6	6	6	0.811	0.594324	0.696	0.0769562		0.199472	0.158104	0.131437	0.326157	0.250521	0.25095	0.190924	0.148538	0.145029	0.132835	0.153666	0.202443	0.175152	0.215309	0.140047	0.197211	0.196129	0.100629	0.226249	0.134129	0.0927709	0.173079	0.120599	0.122987
CEP170	Centrosomal protein of 170 kDa		cytoplasm;cytoskeleton;cytosol;membrane	protein binding			6	6	6	6	0.741	0.269227	1.145	0.925937		0.591159	0.559203	1.12181	0.607993	0.397419	0.847645	1.05563	0.807941	1.10753	0.713626	1.03623	0.983988	0.927925	0.493168	0.931173	0.593304	0.384919	0.773568	1.108	0.473268	0.702591	0.904894	0.431314	1.02969
CERCAM	Probable inactive glycosyltransferase 25 family member 3	cellular component movement	endoplasmic reticulum;membrane;organelle lumen				2	5	3	9	1.518	0.32899	1.036	0.988495		0.0192824	0.255899	0.0944557	0.108299	0.0898287	0.0526084	0.00679027	0.00504134	0.0417596	0.168518	0.0527698	0.0813814	0.110645	0.131761	0	0	0.026622	0.0848412	0	0.336681	0.00751067	0	0.00836472	0.015474
CES1	Isoform 2 of Liver carboxylesterase 1	cell differentiation;metabolic process;response to stimulus	cytosol;endoplasmic reticulum;organelle lumen	catalytic activity		NRF2 pathway; Photodynamic therapy-induced NFE2L2 (NRF2) survival signaling; Irinotecan Pathway; Phase I biotransformations, non P450; Fluoropyrimidine Activity	3	17	6	17	0.979	0.984872	0.853	0.32263		0.887042	1.06011	0.853541	0.529136	0.910261	0.337977	1.89041	1.53571	1.36617	0.483808	0.713497	0.314497	0.830654	0.989381	0.483687	0.247507	0.589331	0.171208	0.642904	0.592105	0.5199	0.246939	0.379333	0.0983489
CFH	Complement factor H	defense response;metabolic process;regulation of biological process;response to stimulus	extracellular	protein binding	Complement and coagulation cascades; Staphylococcus aureus infection	Complement and Coagulation Cascades	19	10	3	6	3.696	4.60091e-10	1.803	0.00957936		0.156236	0.576577	0.252405	0.216998	0.437584	0.308846	0.15797	0.699777	0.406564	0.114655	0.626237	0.746713	0	0.0557075	1.73444	0	0.112763	1.97933	0.11352	0.465149	0.0928052	0.1163	0.560599	0.204121
CFL1	Cofilin-1	cell organization and biogenesis	cytoskeleton	protein binding			6	6	6	6	1.042	0.99965	0.894	0.610443		27.0981	24.7683	17.3954	23.2062	23.4903	21.1141	18.0789	17.3923	17.707	21.0599	19.714	18.2898	24.7686	30.4427	17.8035	26.7919	27.7634	23.0131	17.2797	17.1204	16.5858	19.2803	19.212	15.1794
CGGBP1	CGG triplet repeat-binding protein 1	metabolic process;regulation of biological process	nucleus	DNA binding;protein binding			28	4	6	6	1.035	0.99965	0.984	0.945147		0.0957062	0.0959833	0.0835429	0.032525	0.0904247	0.0674341	0.0520152	0.0512761	0.0536821	0.127205	0.0608188	0.0642419	0.0445364	0	0	0.0646119	0.081382	0.0758301	0.0475374	0.0979451	0.0548049	0.0236184	0	0
CGNL1	Cingulin-like protein 1	cell organization and biogenesis;cellular component movement;metabolic process;regulation of biological process;transport	cytoplasm;cytoskeleton	catalytic activity;motor activity;protein binding;structural molecule activity;transporter activity			14	6	19	17	0.376	9.43252e-07	0.806	0.318432		0.223994	0.0609493	0.417741	0.030721	0.0127184	0.189294	0.433013	0.120472	0.309474	0.189034	0.109995	0.187175	0.261499	0	0.100905	0.217791	0.0383281	0.259634	0.261167	0.265621	0.184149	0.171168	0.116896	0.246981
CGREF1	Isoform 5 of Cell growth regulator with EF hand domain protein 1	regulation of biological process;response to stimulus	extracellular	metal ion binding			6	6	3	6	0.834	0.682108	0.83	0.457143		0.26393	0.442018	0.15751	0.283624	0.387367	0.14432	0.248337	0.112611	0.208079	0.298394	0.272531	0.217465	0.246852	0.296748	0.199026	0.19328	0.178966	0.164786	0.316547	0.242643	0.153151	0.145058	0.249844	0.0893003
CHAMP1	Chromosome alignment-maintaining phosphoprotein 1	cell organization and biogenesis	chromosome;cytoplasm;cytoskeleton;nucleus	metal ion binding;protein binding			25	25	14	25	1.07	0.998015	1.612	0.498969		0.0652039	0.0313272	0.0685487	0.0429068	0.0148654	0.0515536	0.0378641	0.0461459	0.0607789	0.0852315	0.076528	0.101147	0	0.0295899	0.0318182	0.0495542	0	0.0543414	0.0340425	0	0.0499661	0.0403283	0.0411341	0.0692143
CHCHD2P9	Putative coiled-coil-helix-coiled-coil-helix domain-containing protein CHCHD2P9, mitochondrial	cell organization and biogenesis;regulation of biological process	mitochondrion;nucleus	DNA binding			6	6	6	6	1.122	0.940895	1.232	0.839184		0.199653	0.213083	0.252794	0.187211	0.226274	0.353171	0.141571	0.262755	0.198422	0.181614	0.26128	0.178918	0.169733	0.207324	0.315941	0.255522	0.228415	0.294985	0.139065	0.185165	0.102528	0.152635	0.169367	0.183512
CHCHD3	Coiled-coil-helix-coiled-coil-helix domain-containing protein 3, mitochondrial		membrane;mitochondrion				6	6	6	6	0.862	0.602314	1.117	0.948867		2.4353	2.12718	3.37709	1.8772	1.91957	3.27734	3.17468	3.10179	3.53125	2.61928	2.80079	3.03225	1.73181	1.47557	2.19964	2.13959	2.0955	0.769878	3.93876	3.38343	3.72557	3.44919	3.25912	2.79624
CHD4	Isoform 2 of Chromodomain-helicase-DNA-binding protein 4	cell organization and biogenesis;metabolic process;regulation of biological process	cytoplasm;membrane;nucleus	catalytic activity;DNA binding;metal ion binding;nucleotide binding;protein binding			6	25	25	28	0.508	0.11089	1.331	0.873177		0.0515585	0	0.0887766	0.158041	0.125562	0.186282	0.0427894	0.0207156	0.0221952	0.136461	0.0697872	0.165397	0.0325955	0.0406334	0.0377822	0.0590344	0.0640969	0.0460264	0.0859473	0.0393943	0.160972	0.205877	0.258524	0.163031
CHID1	Chitinase domain-containing protein 1	defense response;metabolic process;regulation of biological process;response to stimulus;transport	endosome;extracellular;membrane;nucleus;organelle lumen;vacuole	catalytic activity;protein binding			3	28	24	6	1.037	0.99965	1.087	0.991793		0.0137228	0.00982497	0	0.0101342	0.0346032	0.00881396	0.0364885	0.0596528	0.0417815	0.0193789	0.0604069	0.0451921	0.0213933	0.0325984	0.0202406	0.00628791	0.0242613	0.0084478	0.0139108	0	0.018283	0.0241712	0.0696831	0.0500336
CHMP4B	Charged multivesicular body protein 4b	cell communication;cell organization and biogenesis;metabolic process;regulation of biological process;response to stimulus;transport	cytoplasm;cytosol;endosome;membrane;nucleus	protein binding	Endocytosis		6	6	6	6	0.94	0.916927	1.072	0.990978		4.09555	4.27327	3.73515	3.41831	2.89471	3.86516	2.89606	3.57178	3.12171	3.39569	3.41434	3.86236	4.62744	3.76757	4.53779	5.1075	5.22068	4.88398	3.25339	3.18204	2.86253	3.46582	2.84161	3.41776
CHMP5	Charged multivesicular body protein 5	cell organization and biogenesis;regulation of biological process;transport	cytoplasm;cytosol;endosome;membrane;nucleus	protein binding	Endocytosis		6	6	6	6	0.798	0.553725	0.986	0.90017		1.07155	0.735867	0.999285	1.00845	0.806308	0.844167	0.738733	0.56525	0.797666	0.727368	0.633666	0.734826	0.556369	0.46935	0.568877	0.670298	0.532571	0.626144	0.42343	0.543517	0.242201	0.365894	0.235658	0.290139
CHORDC1	Cysteine and histidine-rich domain-containing protein 1	metabolic process;regulation of biological process		metal ion binding;nucleotide binding;protein binding			0	25	25	6	0.01	8.91795e-17	1.181	0.948867		0.0365219	0	0.0628454	0.116695	0.090316	0.111373	0.133784	0.132502	0.155726	0.10345	0.123632	0.129838	0	0	0	0	0	0	0.104826	0	0.0866134	0.170958	0.112743	0.119879
CIRBP	Cold-inducible RNA-binding protein	cell organization and biogenesis;regulation of biological process;response to stimulus	cytoplasm;nucleus	protein binding;RNA binding;translation regulator activity			6	6	6	6	0.744	0.352522	0.984	0.928229		0.367562	0.433407	0.197689	0.350003	0.144288	0.327698	0.343148	0.588731	0.391231	0.729555	0.522556	0.640163	0.628928	0.513174	0.719447	0.922818	0.524072	0.703061	0.521131	0.630958	0.428352	0.43584	0.298139	0.405444
CISD1	CDGSH iron-sulfur domain-containing protein 1	regulation of biological process	membrane;mitochondrion	metal ion binding;protein binding		Adipogenesis	25	18	6	4	1.643	0.067146	2.328	3.64605e-05		0.151567	0.242344	0.335972	0.142988	0.379186	0.493145	0.244084	0.790873	0.820317	0.16977	0.395521	0.49211	0.0410034	0.0702277	0.173655	0.198973	0.290149	0.356265	0.111345	0.21421	0.222855	0.151392	0.641696	0.857739
CKAP4	Cytoskeleton-associated protein 4	metabolic process;transport	cytoplasm;cytoskeleton;cytosol;endoplasmic reticulum;membrane;organelle lumen	RNA binding	Protein processing in endoplasmic reticulum		6	6	6	6	1.383	0.202849	1.127	0.936312		35.3179	58.5292	45.0571	41.1657	58.2064	55.8292	35.6012	41.4528	36.1687	37.8821	43.2257	39.7892	37.729	53.0735	35.7708	24.1862	30.6934	25.4871	31.1806	47.8349	33.8024	38.7186	49.1305	35.2297
CKAP5	Isoform 3 of Cytoskeleton-associated protein 5	cell division;cell organization and biogenesis;regulation of biological process;transport	chromosome;cytoskeleton;cytosol;membrane	protein binding			6	6	6	6	0.991	0.99965	0.952	0.836764		0.409095	0.468139	0.465135	0.441912	0.584346	0.380465	0.554625	0.546624	0.505943	0.514915	0.636468	0.651519	0.606297	0.784558	0.526612	0.57515	0.647845	0.608958	0.398865	0.481572	0.361133	0.244657	0.534342	0.559415
CKB	Creatine kinase B-type	cellular homeostasis;metabolic process	cytoplasm;cytosol;mitochondrion;nucleus	catalytic activity;nucleotide binding;protein binding	Arginine and proline metabolism; Metabolic pathways	Urea cycle and metabolism of amino groups	6	6	17	6	1.097	0.946042	0.819	0.211709		4.69478	2.73954	2.52656	1.91431	2.18632	1.34916	3.40786	3.43079	2.52197	2.73745	3.61661	2.27744	5.60383	5.60656	3.36557	3.52026	4.24922	4.00306	2.92817	3.21415	3.26384	2.37571	2.54955	1.85524
CLCC1	Chloride channel CLIC-like protein 1	transport	endoplasmic reticulum;Golgi;membrane;nucleus	transporter activity			6	6	6	6	0.982	0.973772	1.014	0.948867		2.76902	2.89078	2.98458	1.57201	1.68781	2.25966	3.54439	3.68447	4.3953	3.8329	2.91241	4.17732	2.74236	2.18642	3.42424	2.98599	2.48084	3.61665	2.39336	2.76027	2.67886	2.39651	1.91149	2.929
CLIC1	Chloride intracellular channel protein 1	metabolic process;regulation of biological process;response to stimulus;transport	cytoplasm;membrane;mitochondrion;nucleus	catalytic activity;protein binding;transporter activity			6	6	6	6	0.854	0.591631	0.92	0.733369		10.4024	7.86411	8.82714	4.12392	3.80493	7.66475	9.17564	8.91921	10.2353	9.82297	8.39514	9.26182	9.3858	8.22429	7.40399	6.99395	6.59085	7.0622	9.23925	7.47796	7.95152	8.25847	6.07309	7.79438
CLIC4	Chloride intracellular channel protein 4	cell differentiation;cell organization and biogenesis;cellular homeostasis;metabolic process;regulation of biological process;response to stimulus;transport	cell surface;cytoplasm;cytoskeleton;cytosol;membrane;mitochondrion;nucleus	catalytic activity;protein binding;transporter activity			6	6	6	6	1.221	0.673008	0.798	0.17178		16.6405	18.819	15.1612	24.499	18.827	18.0477	12.4247	14.1797	15.4385	22.0205	14.4648	17.0004	17.1586	20.682	12.4904	15.0323	13.7757	14.6475	17.3673	22.5599	18.212	21.4357	13.401	20.1962
CLINT1	Isoform 3 of Clathrin interactor 1	cell organization and biogenesis;transport	cytosol;Golgi;membrane	protein binding			6	25	6	28	0.968	0.976614	10.446	1.00949e-16		0.395964	0.355704	0.408111	0.312365	0.36792	0.322818	0	0	0.212024	0.316171	0.283713	0.274768	0.239454	0.253309	0.177095	0.215923	0.215105	0.200318	0	0	0.202059	0.222694	0.197707	0.231157
CLIP1	CAP-Gly domain-containing linker protein 1	cell differentiation;cell organization and biogenesis;metabolic process;regulation of biological process;transport	chromosome;cytoplasm;cytoskeleton;cytosol;endosome;membrane	catalytic activity;metal ion binding;motor activity;protein binding	mTOR signaling pathway	Regulation of Microtubule Cytoskeleton	6	6	6	6	0.954	0.961233	0.973	0.84934		0.90004	0.783351	0.894925	1.44287	1.2432	0.886011	1.11348	0.840502	0.881632	1.24388	1.04469	1.00331	0.739818	0.673864	0.394485	1.35389	0.781382	0.836821	0.992391	0.76164	0.905612	0.974195	0.644297	0.7269
CLPTM1	Cleft lip and palate transmembrane protein 1	cell differentiation;development;regulation of biological process	membrane	protein binding			18	3	1	12	100	8.91795e-17	1.951	0.0868879		0	0.314603	0	0	0.0935335	0.369329	0	0.254812	0.76157	0.516293	0.125261	0.36664	0.0366077	0.365614	0.0621958	0.0464536	0	0.49828	0.0529973	0.228863	0.0483439	0.0592098	0.0836477	0.190394
CLTA	Isoform Non-brain of Clathrin light chain A	cell division;cell organization and biogenesis;cellular component movement;metabolic process;transport	cytosol;membrane	protein binding;structural molecule activity		Synaptic Vesicle Pathway	6	6	6	6	1.028	0.99965	1.25	0.598801		5.77439	3.59134	5.88297	5.65348	5.73151	8.0959	4.74372	4.35586	5.24453	3.74116	4.54865	5.77741	1.88889	2.96303	2.96137	3.0267	2.96593	2.02322	5.19261	4.88639	4.80261	5.60182	5.77522	5.77468
CLTB	Isoform Non-brain of Clathrin light chain B	cell organization and biogenesis;transport	cytosol;membrane	protein binding;structural molecule activity			6	6	6	6	1.152	0.875189	0.973	0.897419		5.07024	5.85153	4.30412	3.69775	3.76465	3.41483	3.858	4.14713	3.95917	2.98498	2.90217	2.61025	1.49571	2.57793	1.7554	1.86765	2.64998	1.89543	4.32157	5.02491	3.5036	2.99731	2.67209	2.47468
CLTC	Clathrin heavy chain 1	cell differentiation;cell division;cell organization and biogenesis;cellular component movement;metabolic process;regulation of biological process;response to stimulus;transport	cytoplasm;cytoskeleton;cytosol;endosome;membrane;vacuole	protein binding;RNA binding;structural molecule activity	Huntington's disease; Bacterial invasion of epithelial cells; Lysosome; Synaptic vesicle cycle; Endocrine and other factor-regulated calcium reabsorption; Endocytosis	Synaptic Vesicle Pathway; Complement and Coagulation Cascades; VEGFA-VEGFR2 Signaling Pathway	6	6	6	6	1.117	0.937168	1.111	0.948867		28.8881	35.4776	32.5864	33.2265	37.5524	26.1996	33.6704	34.549	29.8362	33.0696	34.4376	33.0166	36.0566	41.112	35.2002	31.5812	34.0841	34.6685	34.1802	35.0037	33.9509	33.1684	33.5473	36.9719
CLU	Isoform 2 of Clusterin	cell organization and biogenesis;cell proliferation;defense response;metabolic process;regulation of biological process;response to stimulus;transport	cell surface;cytoplasm;cytosol;endoplasmic reticulum;extracellular;Golgi;membrane;mitochondrion;nucleus;organelle lumen	catalytic activity;protein binding		Complement and Coagulation Cascades	6	28	6	6	1.227	0.822023	0.935	0.815182		0.248211	0.224982	0.0587133	0.270747	0.20368	0.282738	0.0922832	0.122561	0.253684	0.204583	0.166919	0.301167	0.185916	0.123087	0.169071	0.240534	0.210168	0.335528	0.0208452	0.0781407	0.0155869	0.253003	0.16537	0.428123
CMAS	N-acylneuraminate cytidylyltransferase	metabolic process	membrane;nucleus	catalytic activity	Metabolic pathways; Amino sugar and nucleotide sugar metabolism		6	6	6	6	0.925	0.931308	1.039	0.978079		0	0.113482	0.215518	0.0967845	0.120652	0.128626	0.15249	0.177583	0.136488	0.119953	0.132618	0.140405	0.20295	0.184592	0.218959	0.188673	0.162174	0.128095	0.167089	0.134548	0.140486	0.139756	0.118392	0.146885
CMBL	Carboxymethylenebutenolidase homolog	metabolic process	cytoplasm;cytosol	catalytic activity	Metabolic pathways		6	6	25	6	0.979	0.983333	1.189	0.910326		0.128392	0.118727	0.166002	0.377285	0.270697	0.350478	0.319185	0.308168	0.377904	0.332679	0.320275	0.411469	0.209827	0.183544	0.220555	0.293014	0.270941	0.405445	0.167359	0.17161	0.13269	0.234722	0.123147	0.254965
CMPK1	UMP-CMP kinase	metabolic process	cytoplasm;cytosol;nucleus	catalytic activity;nucleotide binding	Metabolic pathways; Pyrimidine metabolism		6	6	6	6	0.949	0.932516	0.975	0.901455		9.70363	8.7014	6.64679	7.24195	6.9501	6.37435	6.4435	5.58073	5.96845	5.5079	4.77607	5.08201	6.27965	5.99361	5.66082	5.03613	5.81508	5.05606	5.14566	5.17065	4.61768	4.14922	3.24631	3.94246
CNBP	Isoform 6 of Cellular nucleic acid-binding protein	metabolic process;regulation of biological process	cytosol;endoplasmic reticulum;nucleus	DNA binding;metal ion binding;protein binding;RNA binding			5	21	23	1	100	8.91795e-17				0	0.0805851	0	0.158283	0	0	0	0.0600689	0	0.0357749	0.0107105	0.0172165	0	0.0928328	0	0	0	0	0	0	0	0.0266479	0	0
CNDP2	Cytosolic non-specific dipeptidase	metabolic process	cytoplasm;cytosol	catalytic activity;metal ion binding	beta-Alanine metabolism; Arginine and proline metabolism; Metabolic pathways; Histidine metabolism		6	6	6	3	0.918	0.850473	1.046	0.990978		6.16975	15.1876	6.42983	11.5982	15.9831	10.1786	9.62751	25.6906	6.94333	6.77975	12.0396	9.1608	7.48739	18.4446	11.8212	15.196	21.7416	14.8002	3.73399	6.67825	3.38369	5.20039	6.59447	4.68728
CNN1	Calponin-1	cell organization and biogenesis;regulation of biological process	cytoskeleton	protein binding		Myometrial Relaxation and Contraction Pathways; Endothelin Pathways	10	6	27	6	1.365	0.240564	0.636	0.000913504		6.81983	9.59153	3.89028	25.8871	34.8675	7.07079	18.8383	11.3962	12.4995	24.7327	25.9239	11.8564	12.6378	27.9618	5.07251	18.6408	32.4772	13.6559	19.1899	21.6499	15.936	25.8174	30.9273	12.5332
CNN2	Calponin-2	cell organization and biogenesis;regulation of biological process;response to stimulus;transport	cytoskeleton;extracellular;membrane;organelle lumen	protein binding		Myometrial Relaxation and Contraction Pathways	6	6	6	6	1.339	0.298518	0.792	0.153051		18.7044	21.9358	10.1411	19.4582	23.4922	9.17032	14.0157	14.2654	12.3609	22.6639	19.0466	15.1659	14.8163	21.3499	8.77732	18.4921	21.0298	14.5995	11.5263	17.1784	10.7063	13.7002	13.1776	10.2753
CNN3	Calponin-3	cell differentiation;cell organization and biogenesis;regulation of biological process	cytoskeleton;cytosol	protein binding			6	6	6	6	1.13	0.919655	0.815	0.234992		16.8493	17.4528	13.1785	21.7905	18.4177	11.9055	16.4896	14.6676	14.5368	22.912	18.9483	17.7022	18.5182	26.2415	12.0886	22.9341	25.6335	20.988	14.6117	19.4327	14.2322	16.0648	18.1507	14.0126
CNOT1	CCR4-NOT transcription complex subunit 1	development;metabolic process;regulation of biological process;response to stimulus	cytoplasm;cytosol;membrane;nucleus	catalytic activity;protein binding;RNA binding;structural molecule activity	RNA degradation		6	27	6	6	11.874	4.92783e-13	11.325	1.51777e-13		0	0.0518804	0.0451494	0.0646356	0.0585723	0.0361799	0.0297067	0.0399081	0.0375677	0.0550033	0	0.0453066	0.0376216	0.038668	0.0281006	0.0354724	0.0364987	0.0378801	0	0.0205994	0.0193303	0.0501737	0.040643	0
CNP	2',3'-cyclic-nucleotide 3'-phosphodiesterase	cell communication;cell differentiation;cell organization and biogenesis;metabolic process;response to stimulus	cytoplasm;membrane	catalytic activity;nucleotide binding;RNA binding		Mecp2 and Associated Rett Syndrome; Glial Cell Differentiation	6	6	6	6	1.047	0.99965	1.13	0.952385		0.193959	0.187624	0.221619	0.15321	0.133365	0.167549	0.219977	0.21641	0.194605	0.210987	0.227709	0.311234	0.209397	0.229085	0.252588	0.204129	0.203074	0.161315	0.196438	0.213271	0.191958	0.138322	0.157509	0.249056
COA3	Cytochrome c oxidase assembly factor 3 homolog, mitochondrial	cell organization and biogenesis;regulation of biological process	membrane;mitochondrion	protein binding			6	6	6	6	1.01	0.99965	1.365	0.230289		0.482042	0.506741	0.715271	0.403884	0.552002	0.686267	0.542642	0.659348	0.646528	0.502075	0.543899	0.610487	0.386579	0.245161	0.620048	0.436129	0.475531	0.48867	0.544267	0.594855	0.461258	0.241734	0.657862	0.450969
COL12A1	Collagen alpha-1(XII) chain	cell differentiation;cell organization and biogenesis;metabolic process	extracellular;organelle lumen	protein binding;structural molecule activity	Protein digestion and absorption		16	17	3	6	1.506	0.164789	0.816	0.36789		0.315808	1.52863	0.394113	0.701113	0.440742	0.232412	0.172074	0.084211	0.10466	0.191069	0.094663	0.182136	0.185316	0.374224	0	0	0.338613	1.64702	1.79288	2.25875	1.5024	0.396368	0.348457	0.234951
COL14A1	Collagen alpha-1(XIV) chain	cell organization and biogenesis	extracellular;organelle lumen	protein binding;RNA binding;structural molecule activity	Protein digestion and absorption		15	17	17	15	0.202	8.91795e-17	0.565	1.68719e-05		18.9614	3.96587	14.3735	4.97546	1.14423	2.71011	18.5042	3.41552	5.68139	5.26963	1.552	2.76445	18.3512	2.06007	7.36116	3.78703	0.912081	2.9251	31.1727	8.52543	23.5011	11.4439	2.50662	4.62531
COL16A1	Collagen alpha-1(XVI) chain	cell organization and biogenesis;regulation of biological process;response to stimulus	extracellular;organelle lumen	protein binding			6	23	6	23	1.043	0.99965	1.011	0.948867		0.55981	0.965673	1.20457	1.04915	0.686614	0.94743	0.305506	0.226971	0.179531	1.01782	0.446217	0.316536	0.657065	0.453039	0.391606	1.10836	1.04295	0.861517	0.330612	0.448247	0.534416	1.35721	0.308298	0.307732
COL1A1	Collagen alpha-1(I) chain	cell communication;cell differentiation;cell organization and biogenesis;cellular component movement;coagulation;metabolic process;regulation of biological process;response to stimulus;transport	cytoplasm;endoplasmic reticulum;extracellular;Golgi;organelle lumen	metal ion binding;protein binding;structural molecule activity	Protein digestion and absorption; Platelet activation; AGE-RAGE signaling pathway in diabetic complications; Focal adhesion; ECM-receptor interaction; Amoebiasis; PI3K-Akt signaling pathway	Focal Adhesion-PI3K-Akt-mTOR-signaling pathway; Inflammatory Response Pathway; Focal Adhesion; miR-509-3p alteration of YAP1/ECM axis; Senescence and Autophagy in Cancer; Osteoblast Signaling	6	23	23	23	0.548	0.000125587	0.358	2.20926e-15		81.2953	67.5034	51.1567	95.1693	7.16894	6.43646	71.7411	4.3037	12.4768	73.3243	6.8763	7.45735	63.814	25.9312	13.5926	39.3369	29.0912	37.8778	70.2388	66.4147	38.1885	100.47	12.5908	11.1042
COL1A2	Collagen alpha-2(I) chain	cell organization and biogenesis;cellular component movement;coagulation;metabolic process;regulation of biological process;response to stimulus	endoplasmic reticulum;extracellular;organelle lumen	metal ion binding;protein binding;structural molecule activity	ECM-receptor interaction; Protein digestion and absorption; PI3K-Akt signaling pathway; AGE-RAGE signaling pathway in diabetic complications; Platelet activation; Focal adhesion; Amoebiasis	miRNA targets in ECM and membrane receptors; TGF-beta Signaling Pathway; Focal Adhesion-PI3K-Akt-mTOR-signaling pathway; Inflammatory Response Pathway; Focal Adhesion	6	6	23	23	0.645	0.00887636	0.522	7.30315e-07		33.4964	31.5331	22.3131	37.9598	7.23252	5.30369	25.1554	4.82128	8.11736	25.8537	4.7698	4.5699	26.5476	14.6496	7.73115	17.467	14.7954	15.5969	29.9561	31.17	18.849	36.8036	9.86244	9.74347
COL3A1	Collagen alpha-1(III) chain	cell organization and biogenesis;metabolic process;regulation of biological process;response to stimulus	extracellular;organelle lumen	metal ion binding;protein binding;structural molecule activity	Platelet activation; Amoebiasis; Protein digestion and absorption; AGE-RAGE signaling pathway in diabetic complications	miR-509-3p alteration of YAP1/ECM axis; miRNA targets in ECM and membrane receptors; Senescence and Autophagy in Cancer; Focal Adhesion; Focal Adhesion-PI3K-Akt-mTOR-signaling pathway; Inflammatory Response Pathway	15	17	17	15	0.56	0.000143911	0.465	1.47085e-09		3.98517	3.9889	2.47948	1.55548	0.468774	0.378685	4.79976	0.392421	0.803487	1.13984	0.261862	0.301164	3.50999	1.39463	1.03943	1.38003	1.04172	1.17325	5.89001	3.57314	1.60953	1.86255	0.281607	0.328269
COL4A1	Collagen alpha-1(IV) chain	cell differentiation;cell organization and biogenesis;metabolic process;regulation of biological process;response to stimulus	extracellular;organelle lumen	protein binding;structural molecule activity	Focal adhesion; Amoebiasis; Small cell lung cancer; Protein digestion and absorption; ECM-receptor interaction; Pathways in cancer; PI3K-Akt signaling pathway; AGE-RAGE signaling pathway in diabetic complications	Overview of nanoparticle effects; Spinal Cord Injury; Focal Adhesion-PI3K-Akt-mTOR-signaling pathway; miRNA targets in ECM and membrane receptors; Focal Adhesion	11	3	10	3	1.59	0.0849127	0.82	0.379444		0.223492	0.834484	0.2576	0.303266	1.37574	0.181734	0.309678	0.750991	0.418096	0.274124	0.671994	0.29211	0.260497	0.777089	0.116888	0	0.538524	0.188273	0.636742	1.21339	0.552383	0.199159	1.16536	0.256164
COL4A2	Collagen alpha-2(IV) chain	cell differentiation;cell organization and biogenesis;metabolic process;regulation of biological process;response to stimulus	extracellular;organelle lumen	protein binding;structural molecule activity	Amoebiasis; PI3K-Akt signaling pathway; Focal adhesion; Protein digestion and absorption; ECM-receptor interaction; AGE-RAGE signaling pathway in diabetic complications; Small cell lung cancer; Pathways in cancer	Focal Adhesion-PI3K-Akt-mTOR-signaling pathway; miRNA targets in ECM and membrane receptors; Focal Adhesion; Hepatitis C and Hepatocellular Carcinoma	11	24	24	11	2.583	1.16574e-07	1.298	0.544652		0.125604	1.7564	0.559644	0.53869	5.11239	0.542752	0.158189	2.34131	1.03494	0.323528	2.07326	0.698176	0.203163	1.02542	0.0540283	0.0706269	0.772662	0.247341	0.266177	1.3841	0.800508	0.191376	4.27837	0.696051
COL5A1	Collagen alpha-1(V) chain	cell organization and biogenesis;cellular component movement;metabolic process;regulation of biological process	extracellular;organelle lumen	metal ion binding;protein binding;structural molecule activity	Protein digestion and absorption	miR-509-3p alteration of YAP1/ECM axis; miRNA targets in ECM and membrane receptors; Focal Adhesion; Focal Adhesion-PI3K-Akt-mTOR-signaling pathway; Allograft Rejection	15	6	6	6	1.094	0.951081	0.762	0.0605478		2.92674	4.52251	2.30934	3.9072	0.935364	1.45613	2.10301	1.18043	1.0503	2.02001	0.842204	0.635663	3.26922	1.5236	1.07445	0.984065	1.41058	0.818658	2.89492	3.87677	2.68441	3.36727	0.866839	0.905905
COL5A2	Collagen alpha-2(V) chain	cell organization and biogenesis;metabolic process;regulation of biological process;response to stimulus	extracellular;organelle lumen	metal ion binding;protein binding;structural molecule activity	Protein digestion and absorption	Focal Adhesion-PI3K-Akt-mTOR-signaling pathway; Focal Adhesion; miRNA targets in ECM and membrane receptors	6	23	23	23	1.038	0.99965	0.565	7.73618e-07		1.64918	1.51781	0.874879	1.99209	0.575157	0.47352	0.909149	0.423292	0.234276	1.26787	0.266232	0.25299	1.05657	1.22855	0.368533	0.682475	0.96838	0.633387	1.04501	1.35919	0.716008	1.69649	0.286475	0.189887
COL6A1	Collagen alpha-1(VI) chain	cell differentiation;cell organization and biogenesis;metabolic process;response to stimulus	extracellular;membrane;organelle lumen	protein binding	ECM-receptor interaction; Protein digestion and absorption; PI3K-Akt signaling pathway; Focal adhesion	miRNA targets in ECM and membrane receptors	6	3	6	6	1.298	0.411621	0.968	0.886319		5.51484	5.97603	4.7139	5.71896	2.4497	1.80558	5.04198	4.08066	3.76749	4.42087	2.72026	0.738275	4.57793	3.74524	2.41305	3.97773	3.98653	2.3012	4.32694	7.04288	3.32815	5.02096	2.88603	0.990533
COL6A2	Collagen alpha-2(VI) chain	cell organization and biogenesis;metabolic process;response to stimulus	extracellular;membrane;organelle lumen	protein binding	Protein digestion and absorption; PI3K-Akt signaling pathway; Focal adhesion; ECM-receptor interaction	Focal Adhesion; miRNA targets in ECM and membrane receptors; Focal Adhesion-PI3K-Akt-mTOR-signaling pathway	6	6	6	6	1.084	0.976614	0.955	0.839184		2.11908	1.90308	2.5438	2.82655	1.44689	1.4552	3.57925	2.71538	3.09071	2.73249	1.70753	1.55722	2.80206	1.52021	1.52489	2.21865	2.13466	2.50925	4.55142	5.64684	3.81836	3.94755	2.03936	1.99214
COL6A3	Collagen alpha-3(VI) chain	cell organization and biogenesis;metabolic process;regulation of biological process	extracellular;membrane;organelle lumen	enzyme regulator activity;protein binding	PI3K-Akt signaling pathway; Protein digestion and absorption; Focal adhesion; ECM-receptor interaction	miRNA targets in ECM and membrane receptors	17	17	17	17	1.015	0.99965	1.246	0.628043		4.18011	3.87084	4.7213	3.37907	1.03076	0.718044	3.94868	3.07695	4.55556	2.69025	0.501566	0.781241	2.45111	1.21163	1.78244	1.10873	0.512629	1.47954	2.4361	2.61426	3.46945	1.77132	1.19137	0.863844
COMT	Catechol O-methyltransferase	cell communication;metabolic process;regulation of biological process;response to stimulus	cytoplasm;cytosol;membrane;mitochondrion	catalytic activity;metal ion binding;protein binding	Metabolic pathways; Tyrosine metabolism; Steroid hormone biosynthesis; Dopaminergic synapse	Metapathway biotransformation; Dopamine metabolism; Methylation Pathways; Estrogen metabolism; Biogenic Amine Synthesis	6	6	6	12	1.303	0.358619	1.191	0.791595		2.19592	3.34882	2.33517	2.49398	2.90655	2.20183	0.461895	0.501885	1.4454	1.7714	0.495555	0.413538	1.57533	2.22674	1.65616	1.49884	1.67967	1.50058	2.10111	2.57684	2.08724	1.8633	2.0041	1.89105
COPA	Isoform 2 of Coatomer subunit alpha	regulation of biological process;transport	cytoplasm;cytosol;membrane	protein binding;structural molecule activity			6	6	6	6	1.14	0.89631	1.01	0.948867		5.05339	5.97442	4.83845	5.50196	5.6701	4.52854	6.2248	7.32492	6.07507	6.08938	6.36388	5.81263	6.17179	6.46604	4.72975	4.06	5.13158	4.2993	5.14333	5.93105	4.94907	4.87306	5.31504	6.57632
COPB1	Coatomer subunit beta	transport	cytoplasm;cytosol;Golgi;membrane	protein binding;structural molecule activity			6	6	6	6	1.142	0.875844	0.997	0.936149		1.588	1.95457	1.67357	2.88768	2.87044	1.98037	2.64099	2.86032	2.4749	2.67539	3.10008	2.68811	2.44095	2.78886	2.24511	1.93914	2.51618	3.88405	1.988	2.16733	2.13838	2.41186	2.97906	2.91184
COPB2	Coatomer subunit beta'	transport	cytoplasm;cytosol;Golgi;membrane	protein binding;structural molecule activity			6	6	6	6	1.071	0.983333	1.029	0.977202		5.80928	6.31014	6.30928	6.26395	6.41389	6.20316	7.14594	6.79965	6.80703	6.5762	7.21444	7.42837	7.58626	7.2357	6.42916	5.50151	5.76385	6.34748	6.02869	5.45042	5.67428	6.18406	5.61443	6.41549
COPE	Coatomer protein complex, subunit epsilon, isoform CRA_g	transport	cytosol;Golgi;membrane	protein binding;structural molecule activity			6	6	6	6	1.174	0.805989	1.117	0.948867		2.19078	1.08119	0.901936	1.13451	1.17614	0.88813	0.685426	0.850889	0.859509	1.10157	0.982634	0.909872	1.17157	1.48302	1.13539	0.867132	1.10801	1.22028	0.519595	0.700642	0.600388	0.496477	0.29109	0.625899
COPG1	Coatomer subunit gamma-1	cellular component movement;transport	cytoplasm;cytosol;Golgi;membrane	protein binding;structural molecule activity			6	6	6	6	1.13	0.904777	0.937	0.764993		3.19001	3.90488	2.93414	3.14844	3.37339	2.77218	3.69677	4.14528	3.71537	4.58496	4.34852	4.09603	4.38921	4.03082	3.11986	2.95595	3.27989	3.10103	2.57999	2.57953	2.47182	2.7421	2.97063	3.01924
COPS2	Isoform 2 of COP9 signalosome complex subunit 2	cell differentiation;cell organization and biogenesis;cell proliferation;metabolic process;regulation of biological process;response to stimulus	cytoplasm;cytosol	protein binding;signal transducer activity			6	3	16	17	0.936	0.940772	0.802	0.46311		0.0271725	0	0.00732449	0.0100097	0.0100954	0.0641545	0.259799	0.243719	0.115174	0.0880916	0.0776495	0.0923291	0.0458871	0.0403372	0.0360336	0.0159127	0.0379351	0.0266991	0.753613	0.737985	0.783909	0.182775	1.42885	0.170834
COPS3	COP9 signalosome complex subunit 3	cell organization and biogenesis;metabolic process;regulation of biological process;response to stimulus	cytoplasm;cytosol;nucleus	protein binding			6	6	6	6	1.187	0.834073	1.12	0.948867		0.265801	0.447353	0.340277	0.280252	0.325594	0.262156	0.358355	0.388536	0.31889	0.424084	0.379585	0.408232	0.443033	0.282325	0.366382	0.325458	0.373909	0.369585	0.29719	0.358024	0.367962	0.339658	0.300823	0.365039
COPS4	COP9 signalosome complex subunit 4	cell organization and biogenesis;metabolic process;response to stimulus	cytosol;nucleus	catalytic activity;protein binding			14	6	6	6	0.884	0.885585	1.231	0.705236		0.332979	0.322566	0.528264	0.528537	0.615452	0.62778	0.610827	0.505016	0.665877	0.609827	0.579161	0.837033	0.579983	0.0564391	0.821497	0.685281	0.243339	0.64318	0.380411	0.416619	0.417153	0.35943	0.351991	0.539974
COPS6	COP9 signalosome complex subunit 6	cell organization and biogenesis;metabolic process;response to stimulus	cytoplasm;cytosol;nucleus	protein binding		Nucleotide-binding Oligomerization Domain (NOD) pathway	25	6	6	6	1.014	0.999882	0.963	0.873756		0.385014	0.305866	0.398762	0.461781	0.41971	0.426025	0.61348	0.394514	0.669655	0.40624	0.374245	0.465236	0.10704	0.0365485	0.268143	0.393416	0.334867	0.394418	0.473825	0.361761	0.473662	0.553114	0.551357	0.571885
COPS8	COP9 signalosome complex subunit 8	cell organization and biogenesis;metabolic process;regulation of biological process;response to stimulus	cytoplasm;cytosol;nucleus	protein binding			6	6	6	6	0.938	0.956181	1.097	0.97627		0.345899	0.267492	0.437678	0.388646	0.459727	0.49453	0.567904	0.667761	0.850636	0.460409	0.745354	0.709344	0.427547	0.353975	0.448053	0.335509	0.359196	0.373722	0.366142	0.342757	0.353833	0.41443	0.451511	0.446469
COPZ1	Coatomer subunit zeta-1	transport					6	6	25	6	1.063	0.987564	1.204	0.780259		0.260429	0.276286	0.35597	0.699785	0.705767	0.657204	0.552463	0.610849	0.605155	0.500805	0.684498	0.600204	0.537579	0.42288	0.525822	0.47595	0.445248	0.525358	0.480155	0.504425	0.573727	0.741309	0.801968	0.752429
COPZ2	Coatomer subunit zeta-2	transport	cytoplasm;cytosol;Golgi;membrane				6	6	6	6	0.999	0.99965	1.002	0.948867		0.292886	0.41572	0.178916	0.409257	0.531547	0.231556	0.572768	0.596404	0.539225	0.439265	0.588388	0.45522	0.463319	0.446356	0.404273	0.402555	0.487057	0.450692	0.424093	0.369848	0.43948	0.475674	0.450812	0.471603
CORO1B	Coronin-1B	cell organization and biogenesis;cellular component movement;regulation of biological process;response to stimulus	cytoplasm;cytoskeleton;cytosol;membrane	protein binding			6	6	6	6	1.165	0.831879	1.111	0.948867		4.24405	3.87724	3.5276	3.39081	3.86234	3.22746	3.31704	4.42646	3.77014	3.79788	4.64801	4.17516	3.75746	4.17288	4.02509	4.39309	4.82186	5.20104	3.19471	4.08614	3.35214	3.17596	3.48923	3.54799
CORO1C	Isoform 3 of Coronin-1C	cell organization and biogenesis;cellular component movement;regulation of biological process;response to stimulus;transport	cytoplasm;cytoskeleton	protein binding			6	6	6	6	0.93	0.889924	0.976	0.904695		17.1877	17.9731	18.1439	19.7244	16.9809	12.6029	16.1608	14.4255	14.4791	19.8514	12.9045	14.0636	16.598	16.1077	12.3841	13.2783	13.1296	13.0394	16.2961	14.7789	15.0522	16.0282	12.9898	10.724
COTL1	Coactosin-like protein	defense response;response to stimulus;transport	cytoplasm;cytoskeleton;extracellular;nucleus;organelle lumen	protein binding			6	6	6	6	1.15	0.867901	0.817	0.14659		0.850524	0.971854	0.683625	0.866242	0.68094	0.803365	0.985439	0.963153	0.80603	1.09903	0.853316	1.20767	0.605306	0.735243	0.688258	0.545452	0.561112	0.649992	0.912381	1.50028	0.922385	1.42448	1.02634	0.906032
COX4I1	Cytochrome c oxidase subunit 4 isoform 1, mitochondrial	metabolic process;response to stimulus;transport	membrane;mitochondrion;nucleus	catalytic activity;protein binding;transporter activity	Metabolic pathways; Parkinson's disease; Oxidative phosphorylation; Cardiac muscle contraction; Non-alcoholic fatty liver disease (NAFLD); Alzheimer's disease; Huntington's disease	Electron Transport Chain	6	6	6	6	1.11	0.93977	1.247	0.627384		4.07929	4.82051	4.48149	2.81255	4.60811	4.32413	3.08023	3.74216	9.66038	2.56907	8.38309	3.28187	2.7268	2.90275	3.35496	2.76103	2.99299	3.03099	3.03349	3.677	3.18763	2.72152	4.24359	3.2751
COX5A	Cytochrome c oxidase subunit 5A, mitochondrial	metabolic process;transport	membrane	catalytic activity;transporter activity			6	6	6	6	1.144	0.89631	0.905	0.566894		0.969877	0.81376	1.00471	0.49333	0.830273	1.04052	0.698451	0.818777	0.798985	0.535649	0.795665	0.700409	0.417205	0.557115	0.917296	0.502526	0.633444	0.472956	0.688956	0.881764	0.685035	0.593133	0.903165	0.752512
COX5B	Cytochrome c oxidase subunit 5B, mitochondrial	metabolic process;transport	membrane;mitochondrion	catalytic activity;metal ion binding;protein binding;transporter activity	Non-alcoholic fatty liver disease (NAFLD); Cardiac muscle contraction; Alzheimer's disease; Huntington's disease; Metabolic pathways; Oxidative phosphorylation; Parkinson's disease	Electron Transport Chain	6	6	6	6	1.198	0.751658	1.229	0.6998		2.43357	2.73167	2.65471	1.36866	2.12498	2.33219	1.10802	1.4102	1.33693	0.739408	1.35953	1.12853	0.968804	1.16335	1.32263	1.18749	1.21614	1.1697	0.875032	1.47976	1.01246	0.789072	1.8257	0.942697
COX6C	Cytochrome c oxidase subunit 6C	metabolic process;transport	membrane;mitochondrion	catalytic activity;transporter activity	Parkinson's disease; Cardiac muscle contraction; Oxidative phosphorylation; Huntington's disease; Non-alcoholic fatty liver disease (NAFLD); Metabolic pathways; Alzheimer's disease	Electron Transport Chain	6	6	6	6	1.337	0.471188	1.114	0.948867		0.328074	0.453896	0.682222	0.35986	0.3997	0.340142	0.419303	0.664737	0.355944	0.315243	0.570761	0.454644	0.497072	0.609612	0.487707	0.375182	0.506998	0.22004	0.82585	0.989307	0.730068	0.667769	1.24703	1.00803
COX7A2	Cytochrome c oxidase subunit 7A2, mitochondrial	metabolic process;transport	membrane;mitochondrion	catalytic activity;transporter activity	Cardiac muscle contraction; Huntington's disease; Oxidative phosphorylation; Parkinson's disease; Non-alcoholic fatty liver disease (NAFLD); Alzheimer's disease	Electron Transport Chain	6	6	15	6	1.163	0.917225	1.175	0.92044		0.67484	0.167861	0.24308	0.0476312	0.193145	0.171066	0.227803	0.29734	0.308919	0.357269	0.432031	0.385375	0.327554	0.362897	0.346193	0.164173	0.353659	0.167527	0.185774	0.233122	0.222772	0.101427	0.194472	0.228303
CPNE1	Copine-1	cell growth;metabolic process;regulation of biological process;response to stimulus;transport	cytoplasm;cytosol;membrane;nucleus	catalytic activity;metal ion binding;protein binding;transporter activity			6	6	6	6	1.118	0.934824	1.28	0.527327		0.892022	0.865911	0.622463	0.830832	0.809451	0.55347	1.268	1.95104	1.81601	1.79524	2.0328	1.9941	1.3429	1.56518	1.83419	1.56782	1.86985	1.97928	1.61208	1.94029	1.95766	1.90638	2.08913	2.2526
CPNE3	Copine-3	metabolic process;regulation of biological process;response to stimulus;transport	cytoplasm;cytosol;membrane;mitochondrion;nucleus	catalytic activity;protein binding;RNA binding;transporter activity			6	6	6	6	1.112	0.93977	1.153	0.889448		0.925685	1.27091	1.71418	0.997574	1.05969	1.58991	2.04358	2.46546	2.27351	2.27218	2.63813	2.52085	1.85482	1.86753	1.97964	2.15889	2.28032	2.45575	1.53669	1.7634	1.63002	2.19227	2.0181	2.42152
CPOX	Oxygen-dependent coproporphyrinogen-III oxidase, mitochondrial	metabolic process;response to stimulus	cytosol;membrane;mitochondrion	catalytic activity;protein binding;structural molecule activity	Porphyrin and chlorophyll metabolism; Metabolic pathways	Heme Biosynthesis	10	6	6	6	1.86	0.00926551	1.422	0.362477		0.245721	0.209746	0.383552	0.212306	0.308504	0.394041	0.280961	0.385021	0.257194	0.235097	0.413374	0.378124	0	0.172082	0.070153	0.0716435	0.27364	0.088113	0.163264	0.33596	0.246207	0.437633	0.313607	0.293918
CPQ	Carboxypeptidase Q	metabolic process	cytoplasm;endoplasmic reticulum;extracellular;Golgi;vacuole	catalytic activity;metal ion binding;protein binding			17	14	17	18	0.499	0.000860151	0.874	0.432012		0.937683	0.383398	0.645324	0.275698	0.161661	0.400215	0.319595	0.667385	0.298839	0.113341	0	0.624315	0.652872	0.310817	0.660741	0.396794	0.266069	0.31063	0.927296	0.304456	0.592711	0.798933	0.166344	0.524304
CPSF1	Cleavage and polyadenylation specificity factor subunit 1	metabolic process;transport	nucleus	protein binding;RNA binding	mRNA surveillance pathway	mRNA Processing	25	6	4	24	1.407	0.433303	15.431	1.00949e-16		0	0.0968813	0.101032	0.0623847	0	0	0	0	0.0339591	0	0.0564579	0.0307202	0.0355651	0	0.0737338	0.0759893	0.0506903	0.0445748	0.26199	0.29363	0.240862	0.242643	0.293257	0.116382
CPSF2	Cleavage and polyadenylation specificity factor subunit 2	metabolic process;transport	membrane;nucleus	protein binding;RNA binding	mRNA surveillance pathway	mRNA Processing	0	0	20	12	0.01	8.91795e-17	1.288	0.909829		0	0	0	0	0	0.0232852	0.0185306	0	0.0235389	0.0300559	0	0	0	0	0	0	0	0	0	0	0	0	0	0
CPSF6	Isoform 2 of Cleavage and polyadenylation specificity factor subunit 6	cell organization and biogenesis;metabolic process	membrane;nucleus	protein binding;RNA binding			6	6	6	6	1.082	0.984872	1.156	0.908108		0.313884	0.206239	0.267714	0.320282	0.312667	0.353146	0.265446	0.296167	0.322684	0.360405	0.365759	0.551432	0.346442	0.275484	0.319716	0.197434	0.202696	0.344722	0.270873	0.297945	0.399633	0.123852	0.196452	0.496193
CPSF7	Isoform 3 of Cleavage and polyadenylation specificity factor subunit 7	cell organization and biogenesis;metabolic process	membrane;nucleus	protein binding;RNA binding			6	6	6	6	1.032	0.99965	1.326	0.378563		0.577219	0.466957	0.558892	0.428513	0.406729	0.816394	0.458301	0.420425	0.574779	0.467993	0.612359	0.712425	0.500531	0.385062	0.344222	0.579838	0.472821	0.418646	0.417179	0.434902	0.572482	0.406798	0.512	0.679654
CPT1A	Carnitine O-palmitoyltransferase 1, liver isoform	cell differentiation;cell organization and biogenesis;metabolic process;regulation of biological process;response to stimulus;transport	membrane;mitochondrion	catalytic activity;protein binding	Glucagon signaling pathway; Insulin resistance; PPAR signaling pathway; Adipocytokine signaling pathway; Fatty acid metabolism; AMPK signaling pathway; Fatty acid degradation	Mitochondrial LC-Fatty Acid Beta-Oxidation; PPAR signaling pathway; PPAR Alpha Pathway; AMP-activated Protein Kinase (AMPK) Signaling; Fatty Acid Beta Oxidation; Leptin and adiponectin; Sudden Infant Death Syndrome (SIDS) Susceptibility Pathways	6	6	6	6	1.639	0.0230977	1.334	0.306309		0.45737	1.03639	0.852283	0.66296	1.16442	0.879823	0.599868	0.878576	0.678379	1.15048	1.34782	1.11424	0.655409	1.27566	0.911364	0.739119	0.95184	0.816598	0.710111	0.941864	0.678707	0.789479	1.37123	0.878433
CRAT	Carnitine O-acetyltransferase	metabolic process;transport	endoplasmic reticulum;membrane;mitochondrion;organelle lumen	catalytic activity;protein binding	Peroxisome	Fatty Acid Beta Oxidation	3	19	17	6	1.199	0.940772	1.026	0.979172		0.052386	0.0214774	0.0379878	0	0.0160415	0.0113742	0.0180634	0.0368633	0.0394906	0.0325862	0.0454925	0.0488458	0.0847517	0.0888334	0.0517828	0	0.0788927	0.0439308	0.0241216	0.0342557	0.0957493	0.0118336	0.020852	0.0381776
CREB1	Cyclic AMP-responsive element-binding protein 1	cell differentiation;cell organization and biogenesis;cellular component movement;metabolic process;regulation of biological process;response to stimulus;transport	chromosome;mitochondrion;nucleus;organelle lumen	DNA binding;protein binding	Hepatitis B; HTLV-I infection; Estrogen signaling pathway; Dopaminergic synapse; Adrenergic signaling in cardiomyocytes; Circadian rhythm; Circadian entrainment; Aldosterone synthesis and secretion; Antigen processing and presentation; cGMP-PKG signaling pathway; Thyroid hormone synthesis; Cholinergic synapse; Osteoclast differentiation; Tuberculosis; cAMP signaling pathway; Prostate cancer; Vaso…	ATM Signaling Pathway; EGF/EGFR Signaling Pathway; Oncostatin M Signaling Pathway; Mitochondrial Gene Expression; Interleukin-11 Signaling Pathway; Adipogenesis; Leptin signaling pathway; T-Cell antigen Receptor (TCR) Signaling Pathway; Focal Adhesion-PI3K-Akt-mTOR-signaling pathway; Folate-Alcohol and Cancer Pathway; B Cell Receptor Signaling Pathway; BDNF-TrkB Signaling; Energy Metabolism; Mecp…	14	6	14	14	0.081	8.91795e-17	1.302	0.687295		0.201507	0	0.204225	0.17963	0.10437	0.208019	0.173068	0.100527	0.20018	0.142518	0	0.156948	0.20471	0	0.176307	0.140115	0.0882611	0.167845	0.198431	0.131029	0.126812	0.15086	0.139086	0.132841
CREBBP	CREB-binding protein	cell organization and biogenesis;metabolic process;regulation of biological process;response to stimulus	cytoplasm;nucleus	catalytic activity;DNA binding;metal ion binding;protein binding;signal transducer activity	Viral carcinogenesis; Melanogenesis; Renal cell carcinoma; Huntington's disease; cAMP signaling pathway; HIF-1 signaling pathway; Adherens junction; Glucagon signaling pathway; Long-term potentiation; MicroRNAs in cancer; Herpes simplex infection; TGF-beta signaling pathway; Wnt signaling pathway; Pathways in cancer; Influenza A; HTLV-I infection; Epstein-Barr virus infection; Cell cycle; Tubercu…	Hematopoietic Stem Cell Gene Regulation by GABP alpha/beta Complex; Initiation of transcription and translation elongation at the HIV-1 LTR; Notch Signaling Pathway; TGF-beta Receptor Signaling; TGF-beta Signaling Pathway; TNF alpha Signaling Pathway; Pathways Affected in Adenoid Cystic Carcinoma; Sudden Infant Death Syndrome (SIDS) Susceptibility Pathways; Angiogenesis; Wnt Signaling Pathway and…	8	20	17	9	0.559	0.00651743	6.828	1.00949e-16		0.241454	0.132664	0.106316	0.0602456	0.0566866	0.0439204	0	0	0	0.172231	0	0.0937044	0	0	0.0588743	0	0	0	0	0	0	0	0	0.0416392
CRELD1	Isoform 2 of Cysteine-rich with EGF-like domain protein 1			metal ion binding			25	0	0	24	0.01	8.91795e-17	0.108	1.16263e-11		0	0	0	0	0	0	0.0215399	0	0	0	0.0544449	0	0.0338235	0	0.034603	0.0351771	0.0336469	0.060564	0	0	0	0	0	0
CRIP2	Cysteine-rich protein 2	regulation of biological process		metal ion binding;protein binding			6	7	6	6	1.028	0.99965	0.875	0.52136		4.51216	4.87101	3.81813	5.12604	4.3725	2.64245	4.73719	3.50397	4.16362	4.05101	3.67608	3.26145	4.31978	4.81824	3.52114	4.06847	3.59224	3.71013	7.39337	7.08042	4.66085	3.6337	3.5719	3.12003
CRK	Adapter molecule crk	cell organization and biogenesis;regulation of biological process;response to stimulus	cytoplasm;cytoskeleton;cytosol;membrane;nucleus	protein binding	Neurotrophin signaling pathway; Bacterial invasion of epithelial cells; MicroRNAs in cancer; Focal adhesion; ErbB signaling pathway; Shigellosis; Rap1 signaling pathway; Fc gamma R-mediated phagocytosis; Chronic myeloid leukemia; Regulation of actin cytoskeleton; Insulin signaling pathway; Renal cell carcinoma; MAPK signaling pathway; Chemokine signaling pathway; Pathways in cancer	Integrin-mediated Cell Adhesion; Regulation of Actin Cytoskeleton; Rac1/Pak1/p38/MMP-2 pathway; VEGFA-VEGFR2 Signaling Pathway; Interferon type I signaling pathways; EGF/EGFR Signaling Pathway; Signaling of Hepatocyte Growth Factor Receptor; Kit receptor signaling pathway; T-Cell antigen Receptor (TCR) Signaling Pathway; B Cell Receptor Signaling Pathway; Chemokine signaling pathway; Angiopoietin…	6	6	6	6	1.069	0.979508	1.259	0.598029		1.59556	0.606427	1.68926	0.817614	1.45825	0.89137	1.13128	0.95278	1.34453	0.915597	1.09166	1.24056	1.12038	0.641078	1.37664	1.16888	1.23655	1.06062	1.27404	0.668957	1.43287	1.66394	1.25058	1.50211
CRKL	Crk-like protein	metabolic process;regulation of biological process;response to stimulus	cytoplasm;cytosol;endosome	protein binding;RNA binding;signal transducer activity	Neurotrophin signaling pathway; Regulation of actin cytoskeleton; ErbB signaling pathway; MicroRNAs in cancer; Chemokine signaling pathway; Renal cell carcinoma; Rap1 signaling pathway; Bacterial invasion of epithelial cells; Chronic myeloid leukemia; Focal adhesion; Insulin signaling pathway; Pathways in cancer; Shigellosis; MAPK signaling pathway; Fc gamma R-mediated phagocytosis	Chemokine signaling pathway; EGF/EGFR Signaling Pathway; Signaling of Hepatocyte Growth Factor Receptor; IL-3 Signaling Pathway; IL-2 Signaling Pathway; Interferon type I signaling pathways; MAPK Signaling Pathway; Kit receptor signaling pathway; T-Cell antigen Receptor (TCR) Signaling Pathway; B Cell Receptor Signaling Pathway	6	6	6	6	0.968	0.98454	1.106	0.952721		0.308196	0.258859	0.335446	0.397105	0.358579	0.40536	0.435419	0.423646	0.456004	0.430116	0.406972	0.525956	0.383169	0.320117	0.453097	0.465433	0.356442	0.474406	0.312671	0.35897	0.325868	0.333975	0.28867	0.37303
CRLF1	Cytokine receptor-like factor 1	regulation of biological process;response to stimulus	cytosol;extracellular	protein binding			6	6	6	6	1.347	0.237554	1.136	0.935222		2.11077	2.61829	3.545	1.51853	3.03383	2.84646	2.55458	2.0982	2.08018	1.33596	0.314526	2.23855	2.92924	0.578314	3.22622	0.709788	3.35157	2.58912	2.02775	2.59023	2.03915	5.378	1.99582	2.57569
CRTAP	Cartilage-associated protein	metabolic process;regulation of biological process	endoplasmic reticulum;extracellular;organelle lumen	protein binding			5	3	6	6	1.453	0.550414	0.952	0.876978		0.0673414	0.0806557	0.076987	0.0497623	0.139823	0.065581	0.0865391	0.0951577	0.0690756	0.0493551	0.143739	0.0718926	0	0.113651	0	0	0	0.0277725	0.0388253	0.105521	0.0917183	0.0384822	0.0584867	0.044531
CRYAB	Alpha-crystallin B chain	cell death;cell organization and biogenesis;metabolic process;regulation of biological process;response to stimulus	cell surface;cytoplasm;cytoskeleton;cytosol;Golgi;membrane;mitochondrion;nucleus	metal ion binding;protein binding;structural molecule activity	Protein processing in endoplasmic reticulum; Longevity regulating pathway - multiple species		3	17	3	17	1	0.988928	0.736	0.0394526		38.3609	43.9454	19.792	15.0955	25.6755	10.307	35.6319	34.53	28.0692	12.5401	20.0808	10.4498	33.4328	45.3733	19.7864	17.1081	24.2045	14.8586	34.4826	29.571	25.5027	15.5563	19.5274	12.0953
CRYZ	Quinone oxidoreductase	cell organization and biogenesis;metabolic process	cytoplasm;cytosol	catalytic activity;metal ion binding;nucleotide binding;RNA binding			25	25	6	6	0.731	0.280403	1.303	0.420343		0.275501	0.643735	0.810546	0.587765	0.646068	0.761885	1.28467	1.3242	1.54647	1.32935	1.24229	1.38781	0.436048	0.269698	0.484733	0.96131	0.319653	0.774104	0.571982	0.332589	0.549867	0.717833	0.803009	1.21473
CS	Citrate synthase, mitochondrial	metabolic process	mitochondrion;nucleus;organelle lumen	catalytic activity;RNA binding	Glyoxylate and dicarboxylate metabolism; Biosynthesis of amino acids; Metabolic pathways; Carbon metabolism; 2-Oxocarboxylic acid metabolism; Citrate cycle (TCA cycle)	Amino Acid metabolism; TCA Cycle; TCA Cycle and Deficiency of Pyruvate Dehydrogenase complex (PDHc)	6	6	6	6	1.227	0.661696	1.136	0.932158		1.13687	1.49347	1.47509	1.16229	1.42753	1.81879	2.15328	2.91958	2.46535	1.85277	2.44643	2.16957	1.57432	1.60667	1.67018	1.15182	1.45869	1.20366	1.83215	2.0874	1.829	1.58892	2.21259	1.7262
CSDE1	Isoform 4 of Cold shock domain-containing protein E1	metabolic process;regulation of biological process	cytosol;Golgi;membrane	DNA binding;protein binding;RNA binding			6	6	6	6	1.02	0.99965	0.947	0.767516		1.91361	1.86239	1.76396	2.25997	2.07315	2.46082	1.29415	1.40235	1.36304	2.05891	1.89677	2.04285	0.985073	1.45212	0.757203	1.28824	1.23311	1.68547	1.0268	1.08152	1.10226	1.51209	1.24342	1.08609
CSE1L	Exportin-2	cell death;cell proliferation;transport	cytoplasm;cytosol;membrane;nucleus	protein binding;transporter activity			6	6	6	6	1.143	0.885585	1.013	0.941661		0.910034	1.12425	0.657855	1.17395	1.03204	0.767271	1.88342	1.06394	0.867598	2.44553	1.15183	1.15712	1.25265	1.48305	0.924938	1.08099	0.797702	1.22143	0.735015	0.842346	0.694231	0.761128	0.727539	1.64518
CSNK2A1	Casein kinase II subunit alpha	cell communication;cell death;metabolic process;regulation of biological process;response to stimulus	chromosome;cytoplasm;cytosol;membrane;nucleus	catalytic activity;enzyme regulator activity;nucleotide binding;protein binding	Measles; Epstein-Barr virus infection; Wnt signaling pathway; Ribosome biogenesis in eukaryotes; Tight junction; Herpes simplex infection; Adherens junction; NF-kappa B signaling pathway	Brain-Derived Neurotrophic Factor (BDNF) signaling pathway; TNF alpha Signaling Pathway	6	6	6	6	0.998	0.99965	1.048	0.984475		0.865146	0.551653	0.558265	0.567776	0.440898	0.644738	0.390746	0.385807	0.329348	0.65275	0.471795	0.639586	0.651453	0.615163	0.6406	0.536728	0.547161	0.525806	0.377106	0.292513	0.276871	0.415615	0.383573	0.500964
CSRP1	Cysteine and glycine-rich protein 1		nucleus	metal ion binding;RNA binding		Mecp2 and Associated Rett Syndrome	3	6	6	6	1.111	0.940772	0.805	0.192137		2.56011	2.64748	1.54237	2.58538	2.51362	1.20606	5.70327	4.21998	4.4981	3.8204	4.08527	2.82715	4.5995	5.75876	2.37568	2.60197	5.04782	2.98529	3.94841	4.15788	4.27339	2.53873	2.16148	1.85889
CSRP2	Cysteine and glycine-rich protein 2	cell differentiation;development	nucleus	metal ion binding;protein binding		H19 action Rb-E2F1 signaling and CDK-beta-catenin activity; Mesodermal Commitment Pathway	25	6	6	6	0.699	0.0453718	0.931	0.776264		5.84124	4.34599	3.80729	6.20522	6.28981	3.72336	5.31329	2.35576	4.59116	5.92959	4.33255	4.60016	3.32328	2.9679	3.17342	7.93292	5.45554	7.02448	5.62928	3.26536	5.65554	5.21437	4.29029	4.52784
CSTB	Cystatin-B	regulation of biological process;response to stimulus;transport	cytoplasm;cytosol;extracellular;nucleus;organelle lumen	enzyme regulator activity;protein binding;RNA binding			6	6	6	6	0.886	0.720805	1.132	0.930402		5.09481	2.98675	3.72695	4.29565	3.10661	4.74011	5.76796	5.09056	6.08124	3.57802	4.24256	4.76998	4.84276	3.98076	5.47922	5.84041	5.63935	5.55473	5.29589	4.53264	5.78126	6.12926	3.17244	5.77327
CTGF	Connective tissue growth factor	cell communication;cell differentiation;cell proliferation;cellular component movement;metabolic process;regulation of biological process;response to stimulus;transport	cytosol;extracellular;Golgi;membrane	protein binding	Hippo signaling pathway	VEGFA-VEGFR2 Signaling Pathway; Lung fibrosis; Hypothesized Pathways in Pathogenesis of Cardiovascular Disease	6	17	6	6	0.722	0.0642854	1.023	0.953239		3.07414	1.98907	2.90684	3.68213	2.31856	2.71601	2.4375	1.93555	2.14807	2.10325	1.84398	1.39568	2.4675	1.62083	1.46473	2.48349	2.41467	3.63573	3.04079	1.99775	3.99159	1.92366	1.68817	1.19581
CTNNA1	Isoform 2 of Catenin alpha-1	cell organization and biogenesis;regulation of biological process;response to stimulus	cytoskeleton;cytosol;Golgi;membrane	protein binding;RNA binding;structural molecule activity		Apoptosis-related network due to altered Notch3 in ovarian cancer; VEGFA-VEGFR2 Signaling Pathway; Arrhythmogenic Right Ventricular Cardiomyopathy	6	6	6	6	1.146	0.886691	1.025	0.960964		3.13386	3.84338	3.01578	4.2373	4.19257	3.57247	2.9185	3.21275	2.8788	4.43206	4.24321	4.24189	4.1674	3.78069	2.85194	3.75541	3.77699	3.97521	2.9225	3.32148	2.77282	3.85686	3.83869	3.48274
CTNNAL1	Alpha-catulin	regulation of biological process;response to stimulus	cytoplasm;cytoskeleton;cytosol;membrane	protein binding		Regulation of toll-like receptor signaling pathway	0	20	0	0						0	0	0	0	0	0	0	0	0	0	0	0	0	0	0	0	0	0	0	0	0	0	0	0.0806477
CTNNB1	Catenin beta-1	cell communication;cell differentiation;cell growth;cell organization and biogenesis;cell proliferation;cellular component movement;metabolic process;regulation of biological process;response to stimulus;transport	cytoplasm;cytoskeleton;cytosol;membrane;nucleus	DNA binding;protein binding;signal transducer activity	Rap1 signaling pathway; Proteoglycans in cancer; Tight junction; Melanogenesis; Prostate cancer; Basal cell carcinoma; Breast cancer; Leukocyte transendothelial migration; Hippo signaling pathway; Focal adhesion; Arrhythmogenic right ventricular cardiomyopathy (ARVC); HTLV-I infection; Signaling pathways regulating pluripotency of stem cells; Pathways in cancer; Bacterial invasion of epithelial c…	ESC Pluripotency Pathways; Heart Development; Regulation of Wnt/B-catenin Signaling by Small Molecule Compounds; DNA Damage Response (only ATM dependent); Ectoderm Differentiation; Wnt Signaling Pathway; Primary Focal Segmental Glomerulosclerosis FSGS; Wnt Signaling Pathway Netpath; Sudden Infant Death Syndrome (SIDS) Susceptibility Pathways; Adipogenesis; Extracellular vesicle-mediated signaling…	6	6	6	6	1.247	0.519874	0.993	0.922434		1.84001	2.65062	1.90969	2.60405	2.99928	2.06177	1.98054	2.28149	1.86646	3.11731	2.60594	2.41822	2.43894	2.90538	1.60929	2.52975	2.49223	2.42661	1.79647	2.21991	1.73393	2.36811	2.36616	2.21042
CTNNBL1	Beta-catenin-like protein 1	cell death;metabolic process;regulation of biological process	cytoplasm;membrane;nucleus;spliceosomal complex	protein binding	Spliceosome		24	6	17	12	0.72	0.354303	1.42	0.557358		0.169538	0.134181	0.231579	0.0808841	0	0	0.0776072	0	0.0877868	0.0982434	0	0	0.0710676	0.0472391	0.0862467	0.0447579	0.386683	0.0420412	0.132329	0.115015	0.238198	0.124457	0.143591	0
CTNND1	Isoform 1AC of Catenin delta-1	cell organization and biogenesis;metabolic process;regulation of biological process;response to stimulus	cytoplasm;cytosol;membrane;nucleus	protein binding		Wnt Signaling Pathway and Pluripotency; VEGFA-VEGFR2 Signaling Pathway	6	6	6	6	1.03	0.99965	1.011	0.948867		1.41111	1.05039	1.28567	2.13102	1.87097	1.92473	1.47958	1.71465	1.92447	2.25376	2.25237	2.22615	1.58686	1.89789	1.34956	2.3996	1.20518	1.84081	1.25505	2.03973	1.35726	1.89373	1.80755	1.70481
CTPS1	CTP synthase 1	cell proliferation;metabolic process;response to stimulus	cytosol;membrane	catalytic activity;nucleotide binding;protein binding	Metabolic pathways; Pyrimidine metabolism		10	6	10	6	2.238	7.23367e-07	1.003	0.935691		0.993639	2.86562	1.2043	2.60977	4.01423	1.68578	1.57482	2.58729	1.46812	2.55063	3.9691	2.15043	1.29402	3.49422	0.947553	1.60257	3.27738	1.30608	1.13846	2.86408	1.56709	2.0756	2.73068	1.50316
CTSA	Lysosomal protective protein	metabolic process;regulation of biological process;transport	endoplasmic reticulum;extracellular;membrane;organelle lumen;vacuole	catalytic activity;enzyme regulator activity			6	6	6	17	0.726	0.166883	0.978	0.873177		0.874876	0.461477	0.92228	0.64362	0.572134	0.811121	1.8027	1.49487	2.01162	0.592804	0.90993	0.850382	0.993139	0.992624	1.41652	1.0514	1.03547	1	1.23203	0.848498	1.13177	1.12708	0.93175	1.13698
CTSB	Cathepsin B	cell differentiation;metabolic process;regulation of biological process;response to stimulus;transport	extracellular;mitochondrion;organelle lumen;vacuole	catalytic activity;protein binding	Renin secretion; Antigen processing and presentation; NOD-like receptor signaling pathway; Apoptosis; Lysosome		6	6	6	6	0.746	0.132783	1.093	0.964062		48.5381	34.1109	46.7673	30.9293	32.9019	44.4213	35.007	29.5638	36.6923	22.6473	23.2766	25.1716	33.4214	26.0311	45.4354	32.5562	27.3858	32.6318	35.3069	32.528	32.2382	27.7727	28.9437	27.6317
CTSD	Cathepsin D	metabolic process;transport	extracellular;membrane;organelle lumen;vacuole	catalytic activity;protein binding	Sphingolipid signaling pathway; Lysosome; Apoptosis; Tuberculosis	Prolactin Signaling Pathway	6	6	17	17	0.616	0.00310238	0.836	0.321982		141.011	70.3487	100.924	58.2786	50.9651	54.4803	122.334	70.9017	93.6028	58.1496	45.0482	53.6005	117.846	69.3869	145.229	106.253	81.3087	94.6443	90.2463	54.663	67.4049	85.9221	39.9758	51.3847
CTSZ	Cathepsin Z	cell organization and biogenesis;metabolic process;regulation of biological process;transport	cell surface;endoplasmic reticulum;extracellular;membrane;organelle lumen;vacuole	catalytic activity;protein binding	Lysosome; Apoptosis		6	6	17	6	0.691	0.0357999	0.997	0.948867		11.1139	5.84825	9.3018	4.58416	3.99283	7.26134	7.97121	5.16951	7.89122	4.95738	4.50027	6.14129	9.41923	6.18885	10.7453	6.76489	5.53792	6.87153	7.47256	5.40039	6.82556	5.06404	4.60581	5.12097
CTTN	Src substrate cortactin	cell organization and biogenesis;cellular component movement;regulation of biological process;transport	cytoplasm;cytoskeleton;cytosol;Golgi;membrane	protein binding	Proteoglycans in cancer; Tight junction; Bacterial invasion of epithelial cells; Pathogenic Escherichia coli infection; Shigellosis	Pathogenic Escherichia coli infection; Hepatitis C and Hepatocellular Carcinoma	6	6	6	6	0.914	0.833401	1.078	0.978134		36.5419	45.9046	33.0329	36.9828	45.4827	30.4942	32.4791	31.6926	30.6163	34.9869	33.4775	28.5374	28.1005	32.1705	25.4327	30.3225	33.6606	28.2883	38.369	41.2231	32.9444	36.2664	36.9615	31.8674
CUL2	Isoform 2 of Cullin-2	metabolic process;regulation of biological process;response to stimulus	cytosol	catalytic activity;protein binding			14	6	16	15	0.243	5.88403e-08	1.076	0.979172		0	0	0	0	0.0633965	0.133998	0.113396	0.0316012	0	0	0.103176	0	0.0796868	0	0.126899	0.0566543	0.0764401	0.114021	0.263225	0.0361898	0.148193	0.138397	0.31374	0.18346
CUL3	Cullin-3	cell death;cell division;cell organization and biogenesis;cellular component movement;metabolic process;regulation of biological process;response to stimulus;transport	cytoplasm;cytosol;Golgi;membrane;nucleus	catalytic activity;protein binding	Ubiquitin mediated proteolysis; Hedgehog signaling pathway		6	6	6	6	0.891	0.917225	0.917	0.815182		0.0288455	0.0793437	0.0760931	0.0858461	0.0659376	0.0670713	0.0945297	0.109147	0.0843019	0.132064	0.17209	0.166573	0.144666	0.137993	0.0557853	0.0496918	0.0746833	0.109662	0.0929428	0.0848744	0.108073	0.0760232	0.0962325	0.151545
CUL4B	Cullin-4B	cell organization and biogenesis;metabolic process;regulation of biological process;response to stimulus	cytosol;nucleus	catalytic activity;DNA binding;protein binding	Nucleotide excision repair; Ubiquitin mediated proteolysis	Mesodermal Commitment Pathway	6	25	6	6	1.485	0.257293	1.407	0.432927		0.0717285	0.219793	0.18324	0.266819	0.263443	0.215916	0.457402	0.640564	0.459748	0.287446	0.33871	0.381725	0.14048	0.25037	0.281067	0.279426	0.372063	0.284993	0.183996	0.290978	0.117748	0.544097	0.552409	0.661929
CUX1	Isoform 3 of Homeobox protein cut-like 1	cell organization and biogenesis;cellular component movement;development;metabolic process;regulation of biological process;transport	cytoplasm;cytoskeleton;cytosol;Golgi;membrane;nucleus	catalytic activity;DNA binding;motor activity;protein binding			2	0	0	28	1.409	0.771741	1	0.979172		0	0	0	0	0	0	0	0	0.00597304	0.0107566	0.0085343	0.0088277	0.00854216	0.0124155	0	0	0.00819192	0	0	0	0	0	0	0
CYB5A	Cytochrome b5	metabolic process;response to stimulus;transport	cytoplasm;cytosol;endoplasmic reticulum;membrane;mitochondrion	catalytic activity;metal ion binding;protein binding;transporter activity		Oxidation by Cytochrome P450	6	6	6	3	1.487	0.153004	1.345	0.291815		0.619134	0.898829	0.567867	0.563449	1.17292	0.790535	0.756183	1.36989	0.994249	0.250456	1.34035	0.866959	0.368668	0.577885	0.455542	0.75855	0.908544	0.736875	0.469928	0.842815	0.611797	0.639938	1.16039	1.04706
CYB5R3	Isoform 3 of NADH-cytochrome b5 reductase 3	metabolic process		catalytic activity			6	6	6	6	1.243	0.600225	1.045	0.989959		11.1852	17.2865	12.6158	11.6389	14.5354	9.63684	15.7309	18.2991	14.6238	12.6031	15.7777	12.5803	18.0417	20.1354	14.3551	12.3941	15.3651	12.0005	14.924	17.9833	13.4276	12.6271	15.6706	13.8127
CYBRD1	Cytochrome b reductase 1	cellular homeostasis;metabolic process;response to stimulus;transport	membrane	catalytic activity;metal ion binding;protein binding	Mineral absorption		25	6	6	6	1.094	0.954888	0.997	0.935691		2.45853	2.58396	2.10661	1.4645	1.48369	1.54084	1.70508	2.24928	1.76066	1.7172	1.50001	2.40805	1.47031	1.25985	1.32054	2.8198	2.62202	2.56725	1.31146	1.42846	1.14797	1.64581	2.23875	2.41416
CYCS	Cytochrome c	cell death;cell organization and biogenesis;metabolic process;regulation of biological process;response to stimulus;transport	cytosol;membrane;mitochondrion;nucleus	catalytic activity;metal ion binding;protein binding	Tuberculosis; Sulfur metabolism; Colorectal cancer; Small cell lung cancer; Alzheimer's disease; Platinum drug resistance; Toxoplasmosis; Metabolic pathways; Pathways in cancer; Amyotrophic lateral sclerosis (ALS); Hepatitis B; Non-alcoholic fatty liver disease (NAFLD); Parkinson's disease; Legionellosis; Viral myocarditis; Herpes simplex infection; p53 signaling pathway; Apoptosis; Apoptosis - m…	Fas Ligand (FasL) pathway and Stress induction of Heat Shock Proteins (HSP) regulation; Nanomaterial induced apoptosis; miRNA Regulation of DNA Damage Response; Parkinsons Disease Pathway; Apoptosis Modulation by HSP70; Apoptosis; Oxidative Damage; Alzheimers Disease; DNA Damage Response; AGE/RAGE pathway	6	6	6	6	1.102	0.940895	1.49	0.0543421		3.85943	3.73851	4.84369	3.25377	4.81156	5.53454	4.54852	6.45085	6.78646	3.26056	4.72713	4.94471	3.6351	3.74828	5.323	3.41823	4.06653	3.99948	3.16496	3.6327	3.73043	2.91367	4.62834	3.85035
CYFIP1	Cytoplasmic FMR1-interacting protein 1	cell differentiation;cell growth;cell organization and biogenesis;development;regulation of biological process;response to stimulus;transport	cytoplasm;cytosol;extracellular;organelle lumen	protein binding;RNA binding	Regulation of actin cytoskeleton; RNA transport	Brain-Derived Neurotrophic Factor (BDNF) signaling pathway; G13 Signaling Pathway	6	6	6	6	1.018	0.99965	1.123	0.948867		1.09016	1.22886	1.08089	1.73877	1.13181	0.859071	1.57492	1.62249	1.4044	1.60976	1.38286	1.5235	1.35113	1.37771	1.24785	1.184	1.19086	1.27608	1.32217	1.22963	1.1636	1.40709	1.15766	1.37997
CYP1B1	Cytochrome P450 1B1	cell organization and biogenesis;cellular component movement;metabolic process;regulation of biological process;response to stimulus	endoplasmic reticulum;membrane;mitochondrion	catalytic activity;metal ion binding	Steroid hormone biosynthesis; Ovarian steroidogenesis; Chemical carcinogenesis; MicroRNAs in cancer; Tryptophan metabolism; Metabolism of xenobiotics by cytochrome P450	Oxidation by Cytochrome P450; Tryptophan metabolism; Estrogen Receptor Pathway; Sulindac Metabolic Pathway; Estrogen metabolism; Tamoxifen metabolism; Aryl Hydrocarbon Receptor; Melatonin metabolism and effects; Aryl Hydrocarbon Receptor Pathway; Metapathway biotransformation; Benzo(a)pyrene metabolism	25	17	17	6	0.468	1.59777e-06	0.843	0.304904		8.08443	2.88199	5.64739	1.2058	0.589637	1.25817	1.05469	0.71785	0.909543	1.12635	0.538209	1.29303	0.642617	0	1.07765	1.64807	0.903138	2.67466	3.34379	1.24932	1.87129	0.497184	0.196931	0.622427
CYP51A1	Lanosterol 14-alpha demethylase	metabolic process;regulation of biological process	endoplasmic reticulum;membrane	catalytic activity;metal ion binding	Steroid biosynthesis; Metabolic pathways	Sterol Regulatory Element-Binding Proteins (SREBP) signalling; Oxidation by Cytochrome P450; Metapathway biotransformation; Cholesterol Biosynthesis	10	10	10	10	1.718	0.0326807	0.812	0.364866		0.187135	0.604542	0.204765	0.586407	0.747109	0.296158	0.407458	0.937169	0.208065	0.775153	1.178	0.412754	0.245017	0.515203	0.13436	0.296666	0.590278	0.0858668	0.339284	0.675004	0.0509299	0.671696	1.20629	0.573026
CYR61	Protein CYR61	cell communication;cell death;cell differentiation;cell organization and biogenesis;cell proliferation;cellular component movement;metabolic process;regulation of biological process;response to stimulus	extracellular;organelle lumen	nucleotide binding;protein binding		Hypertrophy Model; Oncostatin M Signaling Pathway	6	6	6	3	0.901	0.907558	0.81	0.333581		0.644848	0.711102	0.176517	0.533575	0.387726	0.2933	0.385221	0.318479	0	0.148218	0.283506	0.11002	0.357227	0.325833	0.0838761	0.24669	0.317878	0.272053	0.707447	0.571822	0.141529	0.393979	0.283034	0.258155
CYTH3	Cytohesin-3	regulation of biological process;transport	cytoplasm;cytosol;membrane	protein binding	Phospholipase D signaling pathway; Endocytosis	Insulin Signaling	6	3	15	6	1.25	0.882201	0.689	0.221031		0.101372	0	0.066584	0.0494671	0.0635273	0.0318282	0.048754	0.0569243	0.0549833	0.0998021	0.0638556	0.0647621	0.0789841	0.103951	0.0469761	0.0750444	0.0838507	0.068669	0.044763	0.0650926	0	0.0363507	0.0509576	0.0288881
DAAM1	Disheveled-associated activator of morphogenesis 1	cell organization and biogenesis;regulation of biological process;response to stimulus	cytoplasm;cytoskeleton;cytosol;membrane	protein binding	Wnt signaling pathway	Association Between Physico-Chemical Features and Toxicity Associated Pathways	8	19	4	6	0.968	0.976614	0.985	0.925861		0.0798006	0.235164	0.163818	0.0539981	0.0410727	0.10494	0.240303	0.222635	0.209924	0.0897492	0.15882	0.165391	0.107298	0.0638244	0.972373	0.0780281	0	0.0877432	0.0816637	0.155216	0.881791	0.100071	0.0466302	0.106764
DAB2	Disabled homolog 2	cell death;cell differentiation;cell organization and biogenesis;cell proliferation;development;regulation of biological process;response to stimulus;transport	cytoplasm;cytosol;membrane	protein binding;receptor activity	Endocytosis	TGF-beta Signaling Pathway; Endoderm Differentiation	6	6	6	6	0.654	0.0782017	0.916	0.637363		0.929927	0.525335	0.848348	1.06208	0.396672	0.97197	1.02255	0.71633	1.22967	0.724837	0.482754	0.793943	0.795028	0.345623	0.51304	0.650437	0.344168	0.701097	0.552365	0.374587	0.518755	0.361096	0.244903	0.640263
DAK	Bifunctional ATP-dependent dihydroxyacetone kinase/FAD-AMP lyase (cyclizing)	defense response;metabolic process;regulation of biological process;response to stimulus	cytosol;nucleus	catalytic activity;metal ion binding;nucleotide binding;protein binding	Metabolic pathways; Glycerolipid metabolism; RIG-I-like receptor signaling pathway; Carbon metabolism; Fructose and mannose metabolism	RIG-I-like Receptor Signaling	6	6	14	6	1.109	0.985293	1.421	0.80579		0.0105254	0	0.0107983	0.0103951	0	0.0123096	0.0184677	0.019402	0.0338516	0	0.0243397	0.0135452	0.0133119	0.016255	0.0221318	0.0194124	0.0165328	0.0185966	0.0247055	0.0276467	0.0247192	0.0291824	0.0288801	0.0215308
DAPK1	Death-associated protein kinase 1	cell death;metabolic process;regulation of biological process;response to stimulus	cytoplasm;cytoskeleton;membrane	catalytic activity;nucleotide binding;protein binding		Bladder Cancer	9	9	21	28						0	0	0	0.138252	0	0	0	0	0	0.0575972	0.0902529	0.0748521	0	0	0	0.0834464	0	0.0654186	0	0	0	0.21595	0	0.192819
DAPK3	Death-associated protein kinase 3	cell death;cell differentiation;cell organization and biogenesis;metabolic process;regulation of biological process;response to stimulus	cytoplasm;membrane;nucleus	catalytic activity;nucleotide binding;protein binding	Pathways in cancer; Bladder cancer	Bladder Cancer	6	6	23	6	1.021	0.99965	0.722	0.207725		0.132383	0.174909	0.0885642	0.209426	0	0.0889205	0.118994	0.0893714	0.084047	0.098476	0.154209	0.0868156	0.0866843	0.101854	0.054873	0.0850678	0.0899972	0.078583	0.0911204	0.083686	0.105749	0.0733909	0.123872	0.16815
DARS	Aspartate--tRNA ligase, cytoplasmic	cell organization and biogenesis;metabolic process	cytoplasm;cytosol;membrane	catalytic activity;nucleotide binding;protein binding;RNA binding	Aminoacyl-tRNA biosynthesis	Alanine and aspartate metabolism	6	6	6	6	1.031	0.999882	1.089	0.971032		3.91225	3.77898	3.93804	5.60934	4.87637	4.50693	4.64066	4.68643	4.5026	4.23396	4.89466	4.85362	3.95079	4.24828	3.87036	3.34131	3.46182	3.37542	3.94436	6.27407	4.77775	5.18099	4.6423	4.69388
DAZAP1	DAZ-associated protein 1	cell differentiation;cell proliferation;development;regulation of biological process	cytoplasm;cytosol;nucleus	protein binding;RNA binding	mRNA surveillance pathway		6	6	6	6	0.893	0.89631	1.083	0.978079		0.447891	0.214749	0.379621	0.552563	0.480671	0.695035	0.360669	0.321229	0.36875	0.545892	0.630224	0.71933	0.538465	0.514602	0.566479	0.854184	0.810757	0.802655	0.331868	0.480878	0.374452	0.611187	0.539422	0.515997
DBI	Isoform 5 of Acyl-CoA-binding protein	metabolic process;transport	Golgi;organelle lumen	protein binding		PPAR Alpha Pathway; PPAR signaling pathway; Sterol Regulatory Element-Binding Proteins (SREBP) signalling	26	10	24	11	14.93	8.91795e-17	0.01	1.00949e-16		0	0	0	0	0.0686534	0.0353154	0	0.22563	0	0	0.106085	0.0182673	0	0	0	0	0.151874	0	0.245524	0.357927	0	0.267857	0.310927	0.214987
DBN1	Isoform 3 of Drebrin	cell communication;cell organization and biogenesis;cell proliferation;regulation of biological process	cytoplasm;cytoskeleton;membrane	protein binding			6	6	6	6	0.864	0.611822	0.976	0.883485		2.72669	2.5485	2.793	3.73744	3.64154	3.85794	2.72582	2.41199	2.81392	2.62029	3.17875	2.24708	2.72408	1.98896	2.14785	2.84638	2.63385	3.1995	2.56984	3.08799	3.19062	3.78832	3.02222	3.01013
DCD	Isoform 2 of Dermcidin	defense response;metabolic process;response to stimulus	extracellular	catalytic activity;protein binding;RNA binding			5	4	19	27	100	8.91795e-17	100	1.00949e-16		0	0.0812717	0.259113	0.147034	0.0635741	0.108528	0	0	0	0.0812609	0.0842777	0	0	0.0766538	0	0	0	0	0	0.290815	0.163032	0.077426	0.132748	0.0880097
DCTN1	Dynactin subunit 1	cell division;cell organization and biogenesis;cellular component movement;metabolic process;regulation of biological process;transport	chromosome;cytoplasm;cytoskeleton;cytosol;membrane;nucleus	catalytic activity;motor activity;protein binding	Huntington's disease; Vasopressin-regulated water reabsorption		6	6	6	6	1.045	0.99965	1.054	0.998424		3.97841	4.46989	4.00357	4.38503	4.5234	3.71353	4.43474	4.82105	4.27942	3.96269	4.69252	4.81346	4.00665	4.19512	3.81307	4.13248	4.29656	4.99916	4.52076	2.91606	3.38237	3.63538	3.0026	4.10738
DCTN2	Dynactin subunit 2						6	6	6	6	1.007	0.996539	1.063	0.991793		7.61304	6.37846	5.92048	7.02159	4.75522	5.99004	6.08864	6.04325	6.66588	6.33282	6.30665	6.30993	5.70126	5.63481	5.54319	5.77988	6.32643	6.21766	5.31323	5.21394	5.39769	5.62935	4.76898	5.69003
DCTN4	Isoform 3 of Dynactin subunit 4	transport	chromosome;cytoplasm;cytosol;nucleus	protein binding			6	6	6	6	1.124	0.919655	1.044	0.979172		2.07731	2.03874	2.49326	1.85605	1.82009	2.08135	1.9233	2.23967	1.86636	1.8208	1.67827	1.89249	2.09595	1.45871	1.60897	1.88344	1.68651	2.06871	1.77659	2.10053	1.75462	2.67926	1.78356	2.53751
DCTN5	Dynactin subunit 5	transport	chromosome;cytoplasm;cytoskeleton;cytosol;membrane	protein binding	Vasopressin-regulated water reabsorption		17	6	6	6	1.025	0.99965	0.971	0.911335		0.154671	0.0989846	0.112703	0.152194	0.1567	0.149255	0.301744	0.389642	0.234748	0.189737	0.282681	0.285069	0.177124	0.0460979	0.176935	0.0249128	0.0507053	0.0339865	0.112876	0.107413	0.128431	0.106701	0.113885	0.119976
DDAH1	N(G),N(G)-dimethylarginine dimethylaminohydrolase 1	metabolic process;regulation of biological process;response to stimulus	cytosol;mitochondrion	catalytic activity;metal ion binding		Mesodermal Commitment Pathway	6	6	6	6	0.688	0.0278656	1.224	0.712475		2.98371	2.0587	3.58151	2.54342	1.62672	4.2176	2.88451	2.46796	3.0805	2.45689	1.85752	2.67801	3.65472	2.44916	5.23714	6.31974	3.88963	4.48125	4.11399	2.94585	3.41944	4.47561	2.70156	3.58033
DDAH2	N(G),N(G)-dimethylarginine dimethylaminohydrolase 2	metabolic process;regulation of biological process;response to stimulus	cytoplasm;cytosol;mitochondrion	catalytic activity;protein binding			6	6	6	6	0.709	0.0583161	0.988	0.935691		7.79149	3.67483	5.62142	4.183	3.09896	4.63387	4.74641	3.14607	4.71086	5.50219	3.14576	4.93115	4.53657	3.19616	4.41848	6.40323	3.79628	6.54227	4.17235	3.6753	3.98218	4.74817	2.95798	4.6339
DDB1	DNA damage-binding protein 1	cell organization and biogenesis;metabolic process;regulation of biological process;response to stimulus	cytoplasm;nucleus	DNA binding;protein binding	Viral carcinogenesis; Ubiquitin mediated proteolysis; Nucleotide excision repair; Hepatitis B		6	6	6	6	1.192	0.760186	1.184	0.836764		0.888602	0.909296	1.27579	1.39553	1.43953	1.5006	1.03357	1.22561	1.21231	0.990432	1.16832	1.35909	1.22772	1.10215	1.3127	1.30199	1.08904	1.38392	0.820423	0.876497	0.907634	1.12533	1.10864	1.51674
DDI2	Isoform 3 of Protein DDI1 homolog 2	metabolic process	cytosol	catalytic activity;protein binding			6	1	6	6	1.056	0.99965	1.121	0.988545		0.206879	0.158212	0.153387	0.111267	0.151335	0.165465	0.0587534	0.125708	0.13276	0.0924571	0.0768416	0.159366	0.113578	0.165634	0.113001	0.0877572	0.083215	0.165574	0	0.135121	0.033754	0	0.0265795	0.0292653
DDOST	Dolichyl-diphosphooligosaccharide--protein glycosyltransferase 48 kDa subunit	metabolic process;response to stimulus;transport	endoplasmic reticulum;membrane	catalytic activity;protein binding	N-Glycan biosynthesis; Protein processing in endoplasmic reticulum; Metabolic pathways	AGE/RAGE pathway	6	6	6	6	1.306	0.389668	1.064	0.990978		5.79745	8.56312	6.77681	6.67697	8.32212	6.72819	6.284	7.06987	6.03464	6.75966	7.58492	6.56459	5.53228	7.36602	4.87254	4.55154	5.5168	4.12285	5.06878	6.91661	5.24816	5.60703	7.17363	5.85953
DDR2	Discoidin domain-containing receptor 2	cell organization and biogenesis;cell proliferation;metabolic process;regulation of biological process;response to stimulus	cytoskeleton;membrane	catalytic activity;nucleotide binding;protein binding;receptor activity;signal transducer activity		Endochondral Ossification	6	6	17	6	0.748	0.614907	0.958	0.884131		0.0893355	0.0576875	0.0969388	0.0542694	0.0400676	0.036417	0.0752447	0.0610972	0.0567135	0.112341	0.0477019	0.0607104	0.0728528	0.0396378	0.0558705	0.0863112	0.0575547	0.0592469	0.0869088	0.0770179	0.0838264	0.100965	0	0.0495921
DDRGK1	DDRGK domain-containing protein 1	regulation of biological process;response to stimulus	cytoplasm;endoplasmic reticulum;membrane	protein binding			6	6	6	6	1.08	0.986366	0.933	0.829871		0.272174	0.325256	0.333592	0.36828	0.341676	0.35827	0.304488	0.342858	0.301612	0.302705	0.279825	0.297405	0.381791	0.313454	0.246914	0.285929	0.306374	0.32393	0.340153	0.333184	0.156986	0.211183	0.214813	0.382755
DDT	D-dopachrome decarboxylase						6	6	14	6	1.25	0.700939	1.117	0.948867		0.433277	0.203742	0.467576	0.359074	0.148658	0.283086	0.366743	0.351003	0.341645	0.258213	0.222894	0.300635	0.324619	0.650552	0.73733	0.0993624	0.263867	0.555015	0.246627	0.413544	0.302644	0.34604	0.119953	0.354262
DDX1	ATP-dependent RNA helicase DDX1	cell organization and biogenesis;development;metabolic process;regulation of biological process;response to stimulus	cytoplasm;cytosol;membrane;nucleus	catalytic activity;DNA binding;nucleotide binding;protein binding;RNA binding		mRNA Processing; DDX1 as a regulatory component of the Drosha microprocessor	6	6	6	6	0.96	0.940895	1.087	0.972026		4.41293	4.16312	4.43211	4.89763	4.76933	5.29348	4.81815	4.43145	5.04505	4.52465	5.40593	5.38248	3.70519	3.51645	3.80568	3.78711	2.89712	2.99903	4.78948	4.85462	4.32618	5.64195	5.45354	5.50278
DDX17	Probable ATP-dependent RNA helicase DDX17			nucleotide binding		RIG-I-like Receptor Signaling	6	6	6	6	0.969	0.953486	1.295	0.446212		5.22535	3.88694	7.15594	7.06322	6.87872	10.2589	6.66188	7.25615	8.06156	7.73821	9.20876	10.9903	6.21353	5.95839	7.32297	7.77853	6.56478	7.68143	5.88225	4.81073	6.25622	7.52568	6.80044	7.38762
DDX19B	ATP-dependent RNA helicase DDX19B	metabolic process;regulation of biological process;transport	cytoplasm;membrane;spliceosomal complex	catalytic activity;nucleotide binding;protein binding;RNA binding			25	25	28	6	0.838	0.691019	1.168	0.942067		0.10355	0	0.146929	0.270554	0.461496	0.286854	0.373968	0.712268	0.498634	0.281074	0.536307	0.55229	0.232151	0.134734	0.46094	0.552119	0.414219	0.443584	0.27305	0.134162	0.114036	0.390304	0.213706	0.499335
DDX21	Nucleolar RNA helicase 2	cell differentiation;metabolic process;regulation of biological process;response to stimulus	cytoplasm;membrane;nucleus	catalytic activity;nucleotide binding;protein binding;RNA binding			3	22	14	22	1.39	0.236576	0.995	0.931517		1.48981	0.306955	1.35193	1.2033	0.298067	0.387895	4.83241	0.268117	4.61078	0.577047	0.387448	0.436487	0.199313	0.236731	0.126677	0.020065	0.125216	0.0968647	7.41343	0.0729045	7.24925	1.10251	0.489794	0.382637
DDX23	Probable ATP-dependent RNA helicase DDX23	cell organization and biogenesis;metabolic process	cytoplasm;nucleus;spliceosomal complex	catalytic activity;DNA binding;nucleotide binding;protein binding;RNA binding	Spliceosome		6	6	6	6	0.912	0.910592	1.226	0.80209		0.325798	0.13296	0.297133	0.349923	0.277477	0.249486	0.273119	0.273115	0.378724	0.278107	0.282243	0.223397	0.243245	0.22179	0.0851481	0.271746	0.290231	0.282788	0.307029	0.35393	0.303601	0.335371	0.43552	0.29632
DDX39B	Spliceosome RNA helicase DDX39B			nucleotide binding			6	6	6	6	1.175	0.805724	1.258	0.593316		2.63939	3.19511	3.50284	3.59646	3.61017	4.10485	3.40832	3.78706	3.4022	3.60124	3.60447	4.00074	2.6258	2.97288	3.34938	2.67647	2.87725	3.34393	3.54698	3.89063	3.4669	4.60067	5.2214	4.74626
DDX3X	ATP-dependent RNA helicase DDX3X	cell death;cell organization and biogenesis;defense response;metabolic process;regulation of biological process;response to stimulus;transport	cytoplasm;cytosol;extracellular;membrane;mitochondrion;nucleus;organelle lumen	catalytic activity;DNA binding;enzyme regulator activity;nucleotide binding;protein binding;RNA binding	RIG-I-like receptor signaling pathway; Viral carcinogenesis; Hepatitis B	RIG-I-like Receptor Signaling	6	6	6	6	1.019	0.99965	1.091	0.969631		6.10766	4.69884	6.18424	8.79397	7.8835	8.66881	6.03112	6.75607	6.29491	7.73372	7.45683	7.80207	5.48691	5.30002	4.67943	5.58493	5.43859	5.53487	5.24432	5.32998	5.08098	6.25033	5.79086	5.85763
DDX42	Isoform 2 of ATP-dependent RNA helicase DDX42	metabolic process;regulation of biological process	cytoplasm;cytosol;membrane;nucleus	catalytic activity;nucleotide binding;protein binding;RNA binding			6	6	6	6	1.353	0.431481	1.249	0.648402		0.852255	0.727843	0.883735	0.780044	0.487534	1.01804	0.384901	0.684937	0.725339	0.646565	0.635905	0.910456	0.228444	0.381796	0.494902	0.440976	0.447126	0.367528	0.410187	0.471864	0.298719	0.448912	0.435562	0.571252
DDX46	Probable ATP-dependent RNA helicase DDX46	metabolic process;regulation of biological process	cytoplasm;membrane;nucleus	catalytic activity;nucleotide binding;RNA binding	Spliceosome		6	6	6	6	1.135	0.932516	1.079	0.978134		0.251478	0.517989	0.213986	0.433343	0.449483	0.300791	0.101265	0.510431	0.59456	0.431409	0.496934	0.376038	0.351643	0.477185	0.204497	0.350257	0.467165	0.245905	0.584352	0.691001	0.652672	0.514138	0.527216	0.475971
DDX5	Probable ATP-dependent RNA helicase DDX5	cell differentiation;cell growth;cell organization and biogenesis;metabolic process;regulation of biological process;response to stimulus	cytoplasm;membrane;nucleus;spliceosomal complex	catalytic activity;nucleotide binding;protein binding;RNA binding			6	6	6	6	0.97	0.954888	1.076	0.983182		4.87902	4.85568	4.94779	4.69577	4.86571	6.15654	3.17426	4.14494	3.50904	4.67679	4.88207	5.81351	3.75774	3.85056	3.4105	3.64708	3.33737	3.22987	4.12855	3.77491	3.60293	4.11876	4.56652	4.47838
DDX6	Probable ATP-dependent RNA helicase DDX6	cell organization and biogenesis;metabolic process;regulation of biological process	cytoplasm;cytosol;membrane;mitochondrion;nucleus	catalytic activity;nucleotide binding;protein binding;RNA binding	RNA degradation		6	6	6	6	1.063	0.980565	1.121	0.948867		0.569191	0.437283	0.633273	0.781384	0.780583	0.768613	0.724591	0.902489	0.86911	0.860254	1.07316	1.07503	0.892905	0.975472	0.882071	0.664023	0.763517	0.687331	0.85386	0.76034	0.794278	0.800646	0.917334	0.970364
DECR1	2,4-dienoyl-CoA reductase, mitochondrial	cell organization and biogenesis;metabolic process	cytosol;mitochondrion;nucleus;organelle lumen	catalytic activity;nucleotide binding		Fatty Acid Beta Oxidation; Fatty Acid Biosynthesis	6	6	6	6	1.108	0.93977	1.315	0.360547		0.889816	0.669488	0.976021	0.49007	0.757891	1.25454	0.761586	1.08232	1.0391	0.568803	0.837902	0.927948	0.704991	0.658581	1.17148	0.731011	0.855196	0.74048	1.00099	1.07433	1.19611	0.717371	1.16733	1.11908
DEK	Protein DEK	cell organization and biogenesis;metabolic process;regulation of biological process;response to stimulus	nucleus	DNA binding;protein binding;RNA binding			6	4	10	3	1.413	0.188684	1.104	0.957971		0.352151	0.725743	0.437282	0.476814	1.62815	0.555131	0.549701	1.5107	0.899761	0.543395	1.25694	0.742099	0.612201	1.13537	0.41717	0.579325	1.03755	0.643419	0.217389	1.89067	1.94341	1.68588	0.492224	0.49442
DENR	Density-regulated protein	cell organization and biogenesis;metabolic process	ribosome	protein binding;RNA binding			6	6	6	6	1.057	0.989181	1.272	0.610872		0.351217	0.293784	0.492032	0.59576	0.426902	0.658876	0.318453	0.518878	0.466538	0.560993	0.427043	0.497974	0.360989	0.475992	0.618897	0.406254	0.421827	0.427286	0.553103	0.406267	0.7008	0.620867	0.654186	0.517611
DEPTOR	DEP domain-containing mTOR-interacting protein	cell organization and biogenesis;regulation of biological process;response to stimulus	cytoplasm	protein binding	mTOR signaling pathway		6	6	6	17	0.81	0.481492	0.977	0.86378		1.08779	0.729378	0.782373	0.745377	0.609977	0.467491	1.77269	1.61586	2.16516	0.766947	0.701081	0.69091	0.919533	0.771352	0.699925	0.778457	0.468748	0.73909	1.45643	1.12041	1.06553	0.978391	0.636867	1.21178
DFFA	DNA fragmentation factor subunit alpha	cell death;metabolic process;regulation of biological process	cytoplasm;cytosol;membrane;nucleus	enzyme regulator activity;protein binding	Apoptosis	Fas Ligand (FasL) pathway and Stress induction of Heat Shock Proteins (HSP) regulation; Apoptosis	26	19	19	25	0.01	8.91795e-17	0.889	0.688953		0.117906	0	0.283483	0.0700028	0.0647387	0.0782342	0.0878472	0.081216	0.322326	0.401931	0.169167	0.34211	0	0	0	0	0.0966129	0	0.0681944	0	0.397677	0.0614792	0.0288943	0.221385
DFNA5	Non-syndromic hearing impairment protein 5	cell death;cell differentiation;regulation of biological process	cytoplasm;cytosol;membrane				6	6	6	25	1.156	0.890923	0.862	0.425577		0.597539	0.622789	0.390985	0.928395	1.05705	0.519131	0.65413	0.672522	0.556575	1.43193	1.05684	1.16672	0.455667	0.625755	0.290746	0.723877	0.772664	0.648487	0.614659	0.564627	0.521853	0.864879	0.754218	1.01089
DGKA	Diacylglycerol kinase alpha	metabolic process;regulation of biological process;response to stimulus	cytosol;membrane	catalytic activity;metal ion binding;nucleotide binding	Glycerolipid metabolism; Metabolic pathways; Phosphatidylinositol signaling system; Glycerophospholipid metabolism; Choline metabolism in cancer; Phospholipase D signaling pathway		6	6	6	6	0.848	0.709001	0.872	0.389357		1.06887	0.44763	0.655996	0.864374	0.4569	0.648266	0.97834	0.354782	0.2868	0.644182	0.654972	0.422784	0.986571	0.515696	0.731845	0.893866	0.830875	0.984012	0.492258	0.676821	0.529536	0.395859	0.449413	0.380536
DHCR24	Delta(24)-sterol reductase	cell death;cell organization and biogenesis;metabolic process;regulation of biological process;response to stimulus	cytoplasm;cytoskeleton;cytosol;endoplasmic reticulum;Golgi;membrane;nucleus	catalytic activity;nucleotide binding;protein binding	Steroid biosynthesis; Metabolic pathways	Tryptophan metabolism	24	24	24	24	3.577	3.50687e-09	2.828	1.48485e-05		0.0661812	0	0.153342	0.116175	0.500612	0.190771	0	0.240817	0.187195	0.240805	0.754172	0.320606	0.0522904	0.177318	0	0.194139	0.584266	0.374926	0.0408376	0.22631	0.172687	0.0751288	0.495317	0.106227
DHCR7	7-dehydrocholesterol reductase	cell differentiation;metabolic process;regulation of biological process	cytosol;endoplasmic reticulum;membrane	catalytic activity;nucleotide binding	Metabolic pathways; Steroid biosynthesis	Cholesterol Biosynthesis; Vitamin D Metabolism	6	6	10	6	1.7	0.00457282	0.977	0.910048		20.0028	26.7174	13.4828	38.7056	48.0575	16.2571	21.0684	15.739	18.4664	28.2509	24.4116	15.4516	7.71587	9.97384	4.37538	12.1353	13.2162	11.6333	35.1318	48.2766	37.311	27.9215	41.1331	13.9539
DHRS7	Dehydrogenase/reductase SDR family member 7	metabolic process	membrane	catalytic activity			6	6	6	6	1.516	0.170674	1.129	0.954778		0.145667	0.216465	0.202307	0.162471	0.21244	0.210186	0.216586	0.263121	0.185111	0.195219	0.278324	0.206399	0.171635	0.267622	0.199463	0.184171	0.241194	0.180963	0.28303	0.405213	0.138349	0.368104	0.297816	0.445742
DHX15	Putative pre-mRNA-splicing factor ATP-dependent RNA helicase DHX15	metabolic process;response to stimulus	cytoplasm;nucleus;spliceosomal complex	catalytic activity;nucleotide binding;protein binding;RNA binding	Spliceosome	mRNA Processing	6	6	6	6	1.145	0.885585	1.234	0.67399		2.97694	3.47135	4.14711	2.16222	2.50252	3.52604	2.55276	5.01213	4.44705	3.18761	4.89576	5.02547	3.39818	3.2983	3.54166	2.97486	2.67965	3.28671	2.61265	5.5281	4.63896	2.55817	5.26324	5.8624
DHX16	Putative pre-mRNA-splicing factor ATP-dependent RNA helicase DHX16	metabolic process	cytoplasm;nucleus;spliceosomal complex	catalytic activity;nucleotide binding;protein binding;RNA binding	Spliceosome	mRNA Processing	0	20	0	28			100	1.00949e-16		0	0	0	0	0	0	0	0	0.0054068	0.00959711	0.00907237	0.00825035	0	0	0	0	0	0	0	0	0	0	0	0.0126787
DHX30	Isoform 2 of Putative ATP-dependent RNA helicase DHX30	cell organization and biogenesis;metabolic process	cytosol;mitochondrion	catalytic activity;nucleotide binding;protein binding;RNA binding			15	28	13	25	0.035	8.91795e-17	0.259	1.00949e-16		0.873669	0.0272639	0.0544886	0.0296295	0	0	0.0789243	0.0963356	0.0872394	0.411784	0.191076	0.373931	0.652738	0.0404207	0.0518979	0.360455	0.0530232	0.403759	0	0	0.0395226	0.0718439	0.0681755	0.0654392
DHX9	ATP-dependent RNA helicase A	cell death;cell differentiation;cell organization and biogenesis;defense response;metabolic process;regulation of biological process;response to stimulus;transport	cytoplasm;cytoskeleton;cytosol;membrane;nucleus;ribosome	catalytic activity;DNA binding;metal ion binding;nucleotide binding;protein binding;RNA binding		mRNA Processing	6	6	6	6	1.11	0.940895	1.164	0.873177		3.03531	4.61975	5.32248	5.15765	4.90356	6.74299	4.49696	5.48731	5.27113	5.02064	5.95535	6.49895	3.73205	3.66503	6.15495	4.0944	3.64651	4.31752	4.77392	3.71859	5.30148	5.52065	5.23708	6.3839
DIABLO	Diablo homolog, mitochondrial	cell death;metabolic process;regulation of biological process;response to stimulus	cytoplasm;cytosol;mitochondrion	protein binding	Apoptosis; Apoptosis - multiple species	Nanomaterial induced apoptosis; TNF alpha Signaling Pathway; Apoptosis	3	6	22	6	1.04	0.99965	1.196	0.837532		0.348185	0	0.192874	0	0	0.0791658	0.282128	0.366644	0.323837	0.128464	0.312575	0.289197	0.296943	0.311373	0.327244	0.0839529	0.262303	0.120894	0.220824	0.262563	0.324406	0.157259	0.388683	0.266054
DIDO1	Death-inducer obliterator 1	cell death;metabolic process;regulation of biological process;response to stimulus	cytoplasm;cytoskeleton;nucleus	metal ion binding;protein binding;RNA binding			26	0	0	0						0	0	0	0	0	0	0	0	0	0	0	0	0	0	0	0	0.00629936	0	0	0	0	0	0	0
DIS3	Exosome complex exonuclease RRP44	metabolic process;regulation of biological process	cytoplasm;cytosol;membrane;nucleus	catalytic activity;protein binding;RNA binding	RNA degradation		2	20	5	5	100	8.91795e-17				0	0.153347	0	0	0	0	0	0.0467171	0	0	0	0	0.10106	0.137514	0.028778	0	0	0	0	0	0	0	0	0.0365483
DKC1	H/ACA ribonucleoprotein complex subunit 4	cell organization and biogenesis;cell proliferation;metabolic process;regulation of biological process	cytoplasm;nucleus	catalytic activity;protein binding;RNA binding	Ribosome biogenesis in eukaryotes		6	6	6	6	0.919	0.89763	1.061	0.994811		1.01146	0.871795	1.15614	1.24837	2.49735	0.692037	1.41718	1.2415	1.24861	1.4969	1.62696	1.24768	1.44529	1.18776	0.942938	1.00298	2.31436	1.53876	1.90373	1.6153	2.17754	1.58556	2.25996	1.66535
DLAT	Dihydrolipoyllysine-residue acetyltransferase component of pyruvate dehydrogenase complex, mitochondrial	metabolic process;regulation of biological process	mitochondrion;organelle lumen	catalytic activity;protein binding	Carbon metabolism; Pyruvate metabolism; Metabolic pathways; Glycolysis / Gluconeogenesis; Citrate cycle (TCA cycle)	Glycolysis and Gluconeogenesis; TCA Cycle and Deficiency of Pyruvate Dehydrogenase complex (PDHc)	19	17	6	6	0.89	0.894997	1.309	0.486978		0.391194	0.366443	0.596421	0.0297372	0.323828	0.3997	0.452236	0.572258	0.488348	0.0490406	0.423196	0.595863	0.0571403	0.0515968	0.457718	0.0532984	0.288983	0.364689	0.905988	0.434018	0.475932	0	0.547444	0
DLD	Dihydrolipoyl dehydrogenase, mitochondrial	cellular homeostasis;metabolic process;regulation of biological process	mitochondrion;organelle lumen	catalytic activity;nucleotide binding;protein binding	Valine, leucine and isoleucine degradation; Glycolysis / Gluconeogenesis; Carbon metabolism; Glyoxylate and dicarboxylate metabolism; Pyruvate metabolism; Citrate cycle (TCA cycle); Metabolic pathways; Glycine, serine and threonine metabolism; Propanoate metabolism	TCA Cycle and Deficiency of Pyruvate Dehydrogenase complex (PDHc); Fatty Acid Beta Oxidation; Amino Acid metabolism; Glycolysis and Gluconeogenesis; TCA Cycle	6	6	6	6	1.139	0.89192	1.265	0.550823		1.9614	2.40676	3.69586	2.23801	3.03198	4.40645	2.06567	2.74598	2.3739	2.16606	2.37183	2.48585	1.13461	1.58298	2.26181	1.90701	1.97724	1.89986	1.44986	1.5753	1.41557	2.13097	2.3723	1.99617
DLG1	Isoform 2 of Disks large homolog 1	cell communication;cell organization and biogenesis;cell proliferation;metabolic process;regulation of biological process;response to stimulus;transport	cytoplasm;cytosol;endoplasmic reticulum;Golgi;membrane;nucleus	catalytic activity;protein binding;structural molecule activity;transporter activity		T-Cell antigen Receptor (TCR) pathway during Staphylococcus aureus infection; Brain-Derived Neurotrophic Factor (BDNF) signaling pathway	6	6	6	6	0.82	0.666781	0.867	0.447435		0.607788	0.548373	0.507332	0.444045	0.420226	0.42214	0.717705	0.505948	0.606503	0.72788	0.559481	0.780345	0.568343	0.508268	0.504562	0.446375	0.416712	0.498387	0.364499	0.290327	0.251742	0.319322	0.36231	0.327026
DLST	Dihydrolipoyllysine-residue succinyltransferase component of 2-oxoglutarate dehydrogenase complex, mitochondrial	metabolic process	membrane;mitochondrion;nucleus;organelle lumen	catalytic activity	Carbon metabolism; Metabolic pathways; Citrate cycle (TCA cycle); Lysine degradation	TCA Cycle; TCA Cycle and Deficiency of Pyruvate Dehydrogenase complex (PDHc); Amino Acid metabolism	6	6	6	6	1.092	0.96468	1.442	0.0998437		3.6091	3.37993	5.87649	2.38417	3.77176	5.19561	4.77292	5.03174	4.68256	2.89498	5.07107	4.7496	2.39479	3.42392	5.8428	4.56724	5.75202	5.10021	5.7742	7.50079	6.33513	7.38661	7.96882	5.23716
DNAJA1	DnaJ homolog subfamily A member 1	cellular component movement;metabolic process;regulation of biological process;response to stimulus;transport	cytoplasm;cytoskeleton;cytosol;endoplasmic reticulum;membrane;mitochondrion;nucleus	enzyme regulator activity;metal ion binding;nucleotide binding;protein binding	Protein processing in endoplasmic reticulum	Exercise-induced Circadian Regulation	15	28	28	6	0.01	8.91795e-17	1.333	0.776118		0.0477413	0	0.0605018	0.251745	0.217787	0.250385	0.178031	0.192379	0.226154	0.188073	0.231096	0.247225	0.139399	0	0.0285744	0.0600725	0	0.0486909	0	0	0	0.143806	0.114309	0.185946
DNAJB1	DnaJ homolog subfamily B member 1	cell communication;cell organization and biogenesis;cellular homeostasis;coagulation;metabolic process;regulation of biological process;response to stimulus	cytoplasm;cytosol;membrane;mitochondrion;nucleus	catalytic activity;enzyme regulator activity;metal ion binding;nucleotide binding;protein binding	Protein processing in endoplasmic reticulum; Influenza A	NRF2 pathway	25	25	6	19	0.743	0.30013	1.111	0.955141		0.380384	0.261375	0.345764	0.472774	0.059408	0.464917	0.0689032	0.0742506	0.641859	0.0652267	0.0855039	0.115157	0.177111	0.105959	0.373842	0.391811	0.320176	0.371245	0.30952	0.316969	0.0681016	0.498836	0.359408	0.633079
DNAJB11	DnaJ homolog subfamily B member 11	metabolic process;regulation of biological process	cytoplasm;endoplasmic reticulum;membrane;nucleus;organelle lumen	protein binding	Protein processing in endoplasmic reticulum	Photodynamic therapy-induced unfolded protein response	6	6	25	6	1.07	0.980505	1.03	0.970006		0.313088	0.306845	0.334032	0.746939	0.945237	0.943135	0.619482	0.841169	0.608357	0.661596	1.06587	0.661654	0.501157	0.608905	0.543017	0.495184	0.625804	0.552584	0.474721	0.499185	0.483423	0.515048	0.697173	0.57672
DNAJB2	DnaJ homolog subfamily B member 2	metabolic process;regulation of biological process;response to stimulus	cytoplasm;cytosol;endoplasmic reticulum;membrane;nucleus;proteasome	enzyme regulator activity;protein binding	Protein processing in endoplasmic reticulum		6	6	27	6	0.815	0.609222	1.258	0.798863		0.0372075	0	0.0733287	0.28879	0.297749	0.0721248	0.214802	0.189066	0.18867	0.19125	0.193598	0.261511	0.0928013	0.201565	0.263406	0.300839	0.221619	0.0942347	0.360628	0.122672	0.197633	0.324591	0.178918	0.24142
DNAJB4	DnaJ homolog subfamily B member 4	metabolic process;regulation of biological process;response to stimulus	cytoplasm;cytosol;membrane	enzyme regulator activity;protein binding			3	6	3	6	1.991	0.000305757	1.069	0.995961		0.594057	1.98039	0.683809	0.686832	1.36736	0.811829	0.896602	1.2033	0.805551	0.687647	1.16532	0.82624	0.341947	0.964618	0.336686	0.297795	0.788825	0.454773	0.759075	0.948887	0.712651	0.867857	1.15191	0.641296
DNAJC1	DnaJ homolog subfamily C member 1	metabolic process;regulation of biological process	endoplasmic reticulum;membrane;nucleus	DNA binding;enzyme regulator activity;protein binding	Protein processing in endoplasmic reticulum		26	11	5	11	100	8.91795e-17				0	0.0979335	0	0	0	0	0	0.0596128	0	0.0168068	0.0279324	0.0145331	0	0	0	0	0.0448983	0	0	0.0543601	0	0	0.0533759	0
DNAJC10	DnaJ homolog subfamily C member 10	cellular homeostasis;metabolic process;regulation of biological process;response to stimulus	endoplasmic reticulum;membrane;organelle lumen	catalytic activity;enzyme regulator activity;protein binding	Protein processing in endoplasmic reticulum		3	6	6	6	1.18	0.861472	1.087	0.97627		0.359036	0.458257	0.40404	0.398842	0.484194	0.380376	0.39006	0.376683	0.373854	0.404717	0.399204	0.401993	0.354821	0.459612	0.115758	0.108415	0.150174	0.310304	0.369796	0.420753	0.309482	0.342002	0.427786	0.336619
DNAJC13	DnaJ homolog subfamily C member 13	cell differentiation;cell organization and biogenesis;regulation of biological process;transport	cytosol;endosome;membrane	protein binding			6	6	17	6	1.071	0.991863	0.888	0.685122		0.28951	0.171512	0.234205	0.128135	0.102699	0.16284	0.259971	0.343955	0.204278	0.196586	0.242308	0.2412	0.151749	0.247619	0.253373	0.18549	0.2288	0.150995	0.0953233	0.161761	0.118554	0.0898531	0.15491	0.221154
DNAJC3	DnaJ homolog subfamily C member 3	defense response;metabolic process;regulation of biological process;response to stimulus;transport	cytoplasm;cytosol;endoplasmic reticulum;extracellular;membrane;organelle lumen	enzyme regulator activity;protein binding	Influenza A; Protein processing in endoplasmic reticulum	Photodynamic therapy-induced unfolded protein response	6	3	6	6	0.803	0.56239	0.96	0.897108		0.615608	0.271932	0.48677	0.645525	0.649802	0.664364	0.168544	0.0996639	0.0902225	0.183923	0.284279	0.13766	0.244499	0.242709	0.289107	0.350838	0.516748	0.385417	0.132722	0.255421	0.0937325	0.0782422	0.159609	0.108338
DNAJC8	DnaJ homolog subfamily C member 8	metabolic process	cytosol;nucleus	protein binding		mRNA Processing	6	6	6	6	1.017	0.99965	1.221	0.72757		1.48447	2.25989	2.07817	2.97998	2.88002	2.34577	1.16841	1.35809	1.36875	2.21463	1.22977	1.94469	1.55457	1.01165	1.37065	2.50699	1.20167	1.95679	1.70379	0.774051	1.65035	2.05431	1.32926	1.9213
DNAJC9	DnaJ homolog subfamily C member 9	regulation of biological process;response to stimulus	cytoplasm;cytosol;membrane;nucleus	protein binding			6	6	18	6	1.055	0.99965	1.058	0.972026		0.0418496	0.059358	0	0.0108503	0.0731806	0.109187	0.0979121	0.147078	0.11186	0.139169	0.107046	0.140326	0.0576056	0.0586805	0.0558674	0.025622	0.0470975	0.0886459	0.0700998	0.0819085	0.075089	0.0762464	0.0951847	0.115784
DNASE2	Deoxyribonuclease-2-alpha	cell death;cell differentiation;development;metabolic process	vacuole	catalytic activity;DNA binding	Lysosome		6	17	17	17	0.545	0.00206282	0.662	0.000376037		1.60409	0.590674	0.95814	0.727125	0.481226	0.706341	0.981089	0.496996	0.711204	0.359066	0.251594	0.34151	0.964689	0.501955	1.00752	0.77041	0.399162	0.643067	0.68149	0.24287	0.414082	0.378397	0.172012	0.129218
DNM1L	Dynamin-1-like protein	cell death;cell organization and biogenesis;regulation of biological process;transport	cytoplasm;cytosol;endoplasmic reticulum;Golgi;membrane;mitochondrion	catalytic activity;enzyme regulator activity;nucleotide binding;protein binding		Synaptic Vesicle Pathway	6	6	6	6	1.46	0.118966	1.076	0.990978		0.759905	1.20923	0.710591	0.845224	1.23949	0.799112	1.03835	1.72979	1.13498	1.01798	1.52376	0.991387	0.976672	1.42206	0.846179	0.790625	1.26131	0.671128	0.7507	1.20884	0.665107	0.713288	1.06104	0.723006
DNM2	Dynamin-2			catalytic activity;nucleotide binding		Synaptic Vesicle Pathway	6	6	6	6	1.111	0.937834	1.219	0.705236		1.1567	1.53108	1.57087	2.0048	2.04051	1.55522	1.7661	2.15596	1.96306	2.18978	2.31848	2.30805	1.88257	2.21062	2.32976	2.33377	2	2.14989	1.25089	1.22807	2.09426	2.2072	1.88567	2.28048
DNMBP	Dynamin-binding protein	regulation of biological process;response to stimulus	cytoplasm;cytoskeleton	protein binding			19	6	16	14	0.379	5.692e-09	2.219	7.72574e-08		0.506044	0.181437	1.62499	0.921379	0.908832	8.01682	1.67539	0.846118	2.39261	0.996591	0.992341	1.44604	1.14268	0.231528	5.11482	1.19328	0.82008	1.55074	2.93896	1.71409	2.94669	1.9586	1.11401	2.57118
DNPEP	Aspartyl aminopeptidase	metabolic process	cytoplasm;cytosol;nucleus	catalytic activity;metal ion binding;protein binding			6	25	6	14	0.53	0.00258851	1.247	0.798863		0.198877	0.150243	0.202155	0.0892141	0.168639	0.266511	0.223237	0	0.321107	0.109982	0.195976	0.25881	0.303405	0.221264	0.379374	0.30725	0.171702	0.376279	0.155824	0.0988739	0.135454	0.245209	0.113179	0.30419
DOCK5	Dedicator of cytokinesis protein 5	regulation of biological process;response to stimulus	cytoplasm;cytosol;membrane	protein binding			28	28	23	28	1.24	0.92321	1.645	0.55258		0.0281991	0.0295443	0.0452405	0.147977	0.0577268	0.0476408	0	0.0369185	0.0378009	0.121667	0.0725468	0.183899	0.0241213	0.0339934	0.0334516	0.178639	0.155675	0.201374	0.0384418	0.0434075	0.0433731	0.222442	0.160706	0.207534
DOCK7	Dedicator of cytokinesis protein 7	cell differentiation;cell organization and biogenesis;development;regulation of biological process;response to stimulus		protein binding			5	26	2	11	1.415	0.733075	0.01	1.00949e-16		0.0209923	0.0135779	0	0	0	0	0.0112394	0.0151524	0	0	0.0180286	0	0	0.0214785	0	0	0	0	0	0	0	0	0.00726535	0
DPP3	Dipeptidyl peptidase 3	metabolic process	cytoplasm;cytosol;membrane	catalytic activity;metal ion binding;protein binding			6	6	6	6	1.453	0.138838	0.92	0.633056		0.990311	1.43941	0.951059	1.1078	1.14895	0.872676	0.697201	1.13708	0.77451	1.06231	1.03084	0.959426	0.766512	1.1151	0.830836	0.90304	0.828325	0.710728	1.02879	0.996446	0.579198	0.987986	1.0323	0.855133
DPP4	Dipeptidyl peptidase 4	cellular component movement;defense response;metabolic process;regulation of biological process;response to stimulus	cell surface;extracellular;membrane	catalytic activity;protein binding;receptor activity	Protein digestion and absorption		9	6	25	25	0.924	0.937168	1.058	0.994811		0.756287	0.532917	0.635713	1.29742	0.790324	1.55683	0.238299	0.728202	0.742042	1.24901	0.641376	1.00535	0.815604	0.592211	1.13657	6.2182	2.34744	5.4791	0.686048	0.755397	0.774797	1.89158	0.71563	0.958023
DPP7	Dipeptidyl peptidase 2	metabolic process;transport	cytosol;extracellular;Golgi;organelle lumen;vacuole	catalytic activity			25	6	6	6	0.727	0.265868	1.094	0.971032		0.405229	0.213457	0.387356	0.243497	0.218062	0.395836	0.617625	0.505126	0.650598	0.29067	0.353682	0.411094	0.17916	0.11099	0.238739	0.742723	0.215309	0.697541	0.267329	0.245053	0.291519	0.355396	0.253812	0.260823
DPP9	Isoform 2 of Dipeptidyl peptidase 9	metabolic process	cytosol;nucleus	catalytic activity;protein binding		Lung fibrosis	11	6	14	6	1.169	0.925875	0.554	0.00577066		0.110013	0.0300217	0.124263	0.113175	0.0450436	0.0352845	0.197064	0.334905	0.0860417	0.263778	0.115146	0.193207	0.0562933	0.146295	0	0.0458069	0.0746575	0	0.131	0.191391	0.0840658	0.121576	0.130709	0.123886
DPYSL2	Dihydropyrimidinase-related protein 2	cell differentiation;cell organization and biogenesis;cellular component movement;development;metabolic process;regulation of biological process;response to stimulus;transport	cytoplasm;cytoskeleton;cytosol;membrane	catalytic activity;protein binding	Axon guidance	Brain-Derived Neurotrophic Factor (BDNF) signaling pathway; Regulation of Microtubule Cytoskeleton	6	6	6	6	1.182	0.784138	1.185	0.80579		96.4567	98.6126	88.8493	74.7418	70.3064	78.0588	52.6146	70.711	60.5593	66.1679	62.135	68.6251	87.7115	85.6586	103.179	88.5374	84.5891	88.1877	43.1782	67.9665	47.9166	62.7071	54.8685	59.0813
DPYSL3	Isoform LCRMP-4 of Dihydropyrimidinase-related protein 3	cell organization and biogenesis;regulation of biological process;response to stimulus	cytoplasm;cytosol	catalytic activity;protein binding			6	6	6	6	0.828	0.451348	1.008	0.948867		47.6574	40.1491	44.671	54.1969	44.5642	48.1368	44.1782	30.8165	46.2211	60.9227	40.4677	53.4475	52.7638	50.8218	49.3359	62.8448	64.7018	61.3712	38.2213	39.0336	42.4187	55.6257	36.3151	52.9805
DRG1	Developmentally-regulated GTP-binding protein 1	development;metabolic process	cytoplasm;cytosol;membrane	nucleotide binding;protein binding			6	6	6	6	1.061	0.99965	1.208	0.873177		0.39857	0.371571	0.156486	0.245647	0.423809	0.153384	0.267008	0.307438	0.279273	0.33752	0.34509	0.126263	0.164067	0.227117	0.413217	0.0981615	0.394074	0.0964935	0.142034	0.110999	0.106568	0.150604	0.220226	0.187729
DSTN	Destrin	cell organization and biogenesis;regulation of biological process	cytoplasm;cytoskeleton	protein binding		Androgen receptor signaling pathway	6	6	6	6	0.933	0.89631	0.827	0.283994		26.9246	26.23	17.9167	20.5577	24.5098	12.6702	29.6535	25.5765	25.4222	20.4506	24.4326	17.6566	29.0311	29.0616	19.4936	19.2602	27.3097	21.0377	31.0868	27.177	25.4204	21.0389	19.048	14.6741
DTD1	D-tyrosyl-tRNA(Tyr) deacylase 1	metabolic process;regulation of biological process	cytoplasm;cytosol;nucleus	catalytic activity;DNA binding;metal ion binding;RNA binding			6	6	6	6	1.039	0.99965	0.914	0.605881		0.772686	0.731041	0.589879	0.681221	0.808715	0.550596	0.751736	0.60124	0.476078	0.72168	0.593841	0.72665	0.625378	0.781538	0.662802	0.68301	0.581742	0.710272	0.336061	0.486978	0.421524	0.436797	0.537298	0.485641
DTX3L	E3 ubiquitin-protein ligase DTX3L	cell organization and biogenesis;metabolic process;regulation of biological process;response to stimulus;transport	cytoplasm;cytosol;endosome;nucleus;vacuole	catalytic activity;enzyme regulator activity;metal ion binding;protein binding;RNA binding	Notch signaling pathway	Notch Signaling Pathway	0	20	0	0						0	0	0	0	0	0	0	0	0	0	0	0	0	0	0	0	0	0	0	0	0	0	0	0.0377351
DYNC1H1	Cytoplasmic dynein 1 heavy chain 1	cell division;cell organization and biogenesis;cellular component movement;regulation of biological process;transport	cytoplasm;cytoskeleton;cytosol;extracellular;membrane;organelle lumen	catalytic activity;motor activity;nucleotide binding;protein binding;RNA binding	Salmonella infection; Vasopressin-regulated water reabsorption; Phagosome		6	6	6	6	0.882	0.705105	0.945	0.820494		17.5907	21.6995	17.2372	20.8502	19.5013	12.9317	23.8551	20.9472	19.5215	21.2912	20.1503	18.5956	23.1715	18.235	15.1375	17.4639	19.9415	18.2326	25.3106	20.1451	22.438	24.595	19.5822	25.6872
DYNC1I2	Cytoplasmic dynein 1 intermediate chain 2	cellular component movement		protein binding			6	6	6	6	0.805	0.345345	1.024	0.957971		2.41621	1.8225	2.06557	2.41575	1.81608	1.87885	2.2405	2.03713	2.30379	2.24456	2.04545	1.77067	2.39133	1.61132	1.83397	2.16791	2.1903	2.67637	2.29316	1.895	2.31969	2.25297	1.86169	2.6249
DYNC1LI1	Cytoplasmic dynein 1 light intermediate chain 1	cell division;cell organization and biogenesis;cellular component movement;regulation of biological process;transport	chromosome;cytoplasm;cytoskeleton;cytosol;membrane	catalytic activity;motor activity;nucleotide binding;protein binding;RNA binding	Salmonella infection; Vasopressin-regulated water reabsorption; Phagosome		6	6	6	6	0.871	0.81359	1.029	0.960964		0.702869	0.561248	0.690448	0.802666	0.706079	0.678855	0.725774	0.62123	0.748614	0.77134	0.726679	0.360165	0.455001	0.866196	0.400517	0.478432	0.456919	0.536877	0.786475	0.689105	0.772341	0.686348	0.475282	0.30341
DYNC1LI2	Cytoplasmic dynein 1 light intermediate chain 2	cell organization and biogenesis;cellular component movement;response to stimulus;transport	chromosome;cytoplasm;cytoskeleton;cytosol;endosome;membrane;vacuole	catalytic activity;motor activity;nucleotide binding;protein binding	Phagosome; Vasopressin-regulated water reabsorption; Salmonella infection		6	6	6	6	0.767	0.245206	0.921	0.695283		2.44994	1.52976	2.05474	2.03677	1.6179	1.70122	1.69618	1.88268	2.08786	2.07871	1.5704	2.02189	2.16572	1.63482	1.7573	1.89575	1.51274	2.1252	1.62456	1.3558	1.62473	1.54665	1.09561	1.45857
DYNLL1	Dynein light chain 1, cytoplasmic	cell communication;cell death;cell organization and biogenesis;cellular component movement;metabolic process;regulation of biological process;response to stimulus;transport	chromosome;cytoplasm;cytoskeleton;cytosol;membrane;mitochondrion;nucleus	catalytic activity;motor activity;protein binding	Vasopressin-regulated water reabsorption		6	6	25	6	1.253	0.54576	1.112	0.948867		0.493669	1.31435	1.83556	2.65404	2.2513	2.413	1.83149	2.56146	2.10869	2.38524	2.358	2.26023	1.52614	2.15948	1.52862	1.57395	1.32988	0.854879	1.6303	1.85129	2.11181	2.26447	1.8504	2.29973
DYNLRB1	Dynein light chain roadblock-type 1	cellular component movement;response to stimulus;transport	cytoplasm;membrane	catalytic activity;motor activity;protein binding			6	6	15	6	0.86	0.762613	1.051	0.986467		1.79599	0.755931	0.696978	0.57276	0.46258	0.429353	0.618335	0.611137	0.67824	0.97261	0.677601	0.829738	0.991123	0.933502	0.895677	0.593119	0.605926	0.740927	0.514175	0.587195	0.707409	0.365822	0.375748	0.541456
ECE1	Endothelin-converting enzyme 1	metabolic process;regulation of biological process	endosome;membrane	catalytic activity;metal ion binding;protein binding		Melatonin metabolism and effects; Corticotropin-releasing hormone signaling pathway; Endothelin Pathways; Sudden Infant Death Syndrome (SIDS) Susceptibility Pathways	6	6	6	6	1.302	0.558387	0.934	0.801285		0.516402	0.730607	0.478241	0.673802	0.537032	0.703877	0.38073	0.52636	0.376875	0.564429	0.468583	0.440353	0.535854	0.508288	0.276473	0.404006	0.23166	0.3358	0.400855	0.467231	0.34136	0.426682	0.519856	0.491518
ECH1	Delta(3,5)-Delta(2,4)-dienoyl-CoA isomerase, mitochondrial	metabolic process	membrane;mitochondrion	catalytic activity;protein binding	Peroxisome	Fatty Acid Biosynthesis	6	6	6	6	1.382	0.30013	1.126	0.948867		0.813326	0.810889	0.901801	0.488115	0.88623	0.94611	0.922658	1.35657	1.12349	0.429753	1.51493	1.18067	0.602964	0.746871	1.06859	0.905964	0.925785	0.901811	0.461026	0.703823	0.475931	0.470781	0.876407	0.646764
ECHDC1	Ethylmalonyl-CoA decarboxylase	metabolic process	cytoplasm;cytosol;mitochondrion	catalytic activity	Propanoate metabolism	Fatty Acid Biosynthesis	6	6	6	6	1.165	0.831879	1.077	0.990978		0.903132	1.23087	1.14688	1.11387	1.14012	1.14565	0.843762	1.03322	0.856217	0.903643	0.863739	0.869858	1.0336	1.04748	1.22357	1.31905	1.29013	1.26965	0.580931	1.42673	0.635853	0.664274	1.29023	1.43357
ECHS1	Enoyl-CoA hydratase, mitochondrial	metabolic process	mitochondrion;organelle lumen	catalytic activity;protein binding	Fatty acid degradation; Tryptophan metabolism; Carbon metabolism; Fatty acid metabolism; Fatty acid elongation; Lysine degradation; Propanoate metabolism; Valine, leucine and isoleucine degradation; Butanoate metabolism; Metabolic pathways; beta-Alanine metabolism	Fatty Acid Beta Oxidation; Fatty Acid Biosynthesis; Tryptophan metabolism	6	6	15	6	1.131	0.943641	1.543	0.142637		0.436671	0.063028	0.122887	0.0647092	0.093783	0.0843114	0.131234	0.217764	0.221887	0.229763	0.311396	0.33553	0.258165	0.294605	0.398156	0.106376	0.299661	0.22056	0.191755	0.222455	0.246537	0.0887037	0.164234	0.315231
ECI1	Enoyl-CoA delta isomerase 1, mitochondrial	metabolic process	membrane;mitochondrion;organelle lumen	catalytic activity	Fatty acid degradation	Mitochondrial LC-Fatty Acid Beta-Oxidation; Fatty Acid Beta Oxidation	6	6	6	6	1.109	0.946042	1.166	0.891841		0.549571	0.59746	0.601694	0.332785	0.566695	0.520623	0.44651	0.503619	0.420274	0.426727	0.571462	0.419005	0.420915	0.481864	0.501934	0.390406	0.357794	0.336889	0.251165	0.268931	0.277661	0.256525	0.307356	0.272119
EDC4	Enhancer of mRNA-decapping protein 4	metabolic process	cytoplasm;cytosol;membrane;nucleus	protein binding	RNA degradation		6	3	10	6	1.18	0.951614	0.78	0.764016		0.0143069	0.0181664	0	0.0141651	0.0164324	0.0099379	0.0178607	0.0198529	0.0164688	0.0273164	0.0258968	0.026826	0.0292271	0.0326499	0.0165411	0.0195853	0.0181963	0.0200231	0.0232952	0.0279298	0.0230484	0.0136149	0.0197791	0
EDF1	Endothelial differentiation-related factor 1	cell differentiation;development;metabolic process;regulation of biological process	cytoplasm;cytosol;nucleus	catalytic activity;DNA binding;protein binding;RNA binding			6	6	6	6	1.133	0.917225	1.136	0.937289		1.66129	1.5284	1.79787	1.89539	2.04238	2.79155	1.17047	1.43998	1.67185	1.24326	1.72669	1.73262	0.822596	0.959379	1.05206	1.13279	1.36054	1.07731	1.20333	1.25799	1.22816	0.86938	1.09943	1.42353
EEA1	Early endosome antigen 1	cell organization and biogenesis;metabolic process;transport	cytoplasm;cytosol;endosome;membrane	catalytic activity;metal ion binding;motor activity;protein binding;transporter activity	Phagosome; Endocytosis; Tuberculosis	VEGFA-VEGFR2 Signaling Pathway	6	6	6	6	0.81	0.364541	1.078	0.978134		10.1884	12.7121	11.1449	13.0031	12.0519	9.9192	11.1764	10.6602	10.5526	8.93401	9.97533	8.29828	9.3208	7.63473	8.29489	9.19531	9.01597	8.36912	10.5502	11.7816	9.59412	11.2184	11.9152	11.0392
EEF1A1	Elongation factor 1-alpha 1	metabolic process;regulation of biological process;response to stimulus;transport	cytoplasm;cytoskeleton;cytosol;extracellular;membrane;nucleus;organelle lumen	catalytic activity;nucleotide binding;protein binding;RNA binding	RNA transport; Legionellosis	Translation Factors	6	6	6	6	1.049	0.99965	0.954	0.858439		187.134	169.57	165.526	221.006	178.061	200.354	184.279	193.061	173.811	220.386	196.65	195.59	206.998	194.269	169.133	162.396	163.415	168.316	198.091	179.549	166.137	200.813	171.794	193.402
EEF1B2	Elongation factor 1-beta	metabolic process;response to stimulus	cytoplasm;cytosol;endoplasmic reticulum;nucleus	protein binding;RNA binding		Translation Factors	6	6	6	6	0.941	0.947144	1.074	0.990978		0.85216	0.704211	0.623563	0.558368	0.603244	0.758884	0.678219	0.633315	0.707844	0.717452	0.832227	0.877836	1.17725	1.24598	1.22641	0.981736	1.17171	1.03801	0.52185	0.538447	0.564629	0.492846	0.592772	0.678165
EEF1G	Elongation factor 1-gamma	metabolic process;response to stimulus	cytoplasm;cytosol;endoplasmic reticulum;membrane;nucleus	catalytic activity;protein binding;RNA binding		Translation Factors	6	6	6	6	1.131	0.918004	1.019	0.964841		24.5757	32.1154	28.2598	27.37	29.4375	26.3209	24.019	25.3733	21.9436	24.4168	23.3599	23.6611	19.0976	24.4323	17.7883	14.5023	18.5305	16.2108	24.4397	26.1553	23.0906	24.8213	21.1021	22.9517
EEF2	Elongation factor 2	cell differentiation;cell proliferation;metabolic process;regulation of biological process;response to stimulus;transport	cytoplasm;cytosol;extracellular;membrane;nucleus;organelle lumen;ribosome	catalytic activity;nucleotide binding;protein binding;RNA binding	Oxytocin signaling pathway; AMPK signaling pathway	AMP-activated Protein Kinase (AMPK) Signaling; Brain-Derived Neurotrophic Factor (BDNF) signaling pathway; Translation Factors	6	6	6	6	1.096	0.956285	0.939	0.799485		55.7114	61.4248	45.5945	70.531	62.3091	52.2104	65.3734	69.81	60.1206	76.1526	73.7507	66.7381	52.9729	56.8008	39.3025	38.568	46.8721	41.9063	63.7042	59.0887	58.4083	69.8581	66.3282	63.9346
EFEMP1	EGF-containing fibulin-like extracellular matrix protein 1	metabolic process;regulation of biological process;response to stimulus	cell surface;extracellular;membrane	catalytic activity;metal ion binding;protein binding;receptor activity;signal transducer activity			10	6	6	6	1.235	0.600699	0.895	0.587233		1.4548	1.96049	1.85348	1.40047	2.81433	1.57367	1.44733	2.40038	2.08489	1.47663	2.31953	1.14932	1.26295	2.38338	0.86659	1.26621	2.30955	1.20772	2.0045	2.12883	1.40092	1.11638	1.72554	1.70067
EFTUD2	116 kDa U5 small nuclear ribonucleoprotein component	cell organization and biogenesis;metabolic process;response to stimulus	cytosol;membrane;nucleus;spliceosomal complex	catalytic activity;nucleotide binding;protein binding;RNA binding	Spliceosome	mRNA Processing	6	6	6	6	1.086	0.965261	1.139	0.921539		3.20487	2.85573	2.59389	2.37044	2.27568	2.4218	1.93361	2.07118	1.89937	2.57851	2.37186	2.37152	1.88066	1.95058	1.73605	1.6589	1.5455	1.68336	1.37876	2.01244	1.61767	1.33305	1.45673	1.50408
EGFR	Epidermal growth factor receptor	cell organization and biogenesis;cell proliferation;cellular component movement;development;metabolic process;regulation of biological process;response to stimulus	cell surface;cytoplasm;endoplasmic reticulum;endosome;extracellular;Golgi;membrane;nucleus;organelle lumen	catalytic activity;DNA binding;enzyme regulator activity;nucleotide binding;protein binding;receptor activity;signal transducer activity	Pancreatic cancer; Melanoma; Endocytosis; Pathways in cancer; Epithelial cell signaling in Helicobacter pylori infection; MAPK signaling pathway; Bladder cancer; Phospholipase D signaling pathway; Proteoglycans in cancer; HIF-1 signaling pathway; Glioma; Calcium signaling pathway; Breast cancer; Endocrine resistance; Rap1 signaling pathway; Adherens junction; FoxO signaling pathway; EGFR tyrosine…	Aryl Hydrocarbon Receptor; AGE/RAGE pathway; EGF/EGFR Signaling Pathway; ESC Pluripotency Pathways; Focal Adhesion; ERK Pathway in Huntington's Disease; Regulation of Actin Cytoskeleton; Rac1/Pak1/p38/MMP-2 pathway; Spinal Cord Injury; Extracellular vesicle-mediated signaling in recipient cells; Bladder Cancer; Gastric cancer network 2; ErbB Signaling Pathway; Focal Adhesion-PI3K-Akt-mTOR-signali…	0	21	19	18	100	8.91795e-17	100	1.00949e-16		0	0	0.0139388	0	0	0.0169091	0	0.0263494	0.0130984	0.0274923	0.0312398	0.0672285	0	0	0	0	0	0	0	0	0	0.0158516	0	0
EHBP1	EH domain-binding protein 1	transport	cytoplasm;cytosol;endosome;membrane	protein binding			14	6	14	6	0.095	8.91795e-17	1.308	0.814931		0.0584275	0	0.0975165	0.0617974	0.0521262	0.0798375	0.0868281	0.091217	0.0914352	0.0965487	0.071944	0.0876412	0.0920483	0	0.128338	0.121598	0.072017	0.0794016	0.12911	0.116253	0.110073	0.113164	0.0734917	0.0831627
EHBP1L1	EH domain-binding protein 1-like protein 1		endosome;membrane	protein binding			6	6	6	6	1.046	0.99965	0.949	0.767516		1.39767	1.13894	0.967542	1.0688	0.918105	0.731224	1.31869	1.23045	1.28192	1.32081	1.2413	1.50052	1.2452	1.5683	1.03738	1.21874	1.31753	1.16214	0.518677	0.581127	0.567622	0.488667	0.45857	0.534716
EHD1	EH domain-containing protein 1	cell organization and biogenesis;coagulation;regulation of biological process;response to stimulus;transport	endosome;membrane	metal ion binding;nucleotide binding;protein binding	Endocytosis	Insulin Signaling	6	6	6	6	1.125	0.927994	1.078	0.978134		4.71672	6.33784	6.72587	6.38909	6.10562	4.54091	5.99306	5.98325	5.7964	8.54357	6.76689	7.28297	5.78292	7.04369	4.00824	6.36111	5.15958	6.22262	5.39633	6.83473	5.75304	8.12603	6.28429	6.72431
EHD2	EH domain-containing protein 2	cell organization and biogenesis;coagulation;regulation of biological process;transport	cytoplasm;cytoskeleton;cytosol;endosome;membrane;nucleus	catalytic activity;metal ion binding;nucleotide binding;protein binding	Endocytosis	Insulin Signaling	6	6	6	6	0.924	0.874785	1.025	0.972026		11.7461	11.3572	14.0703	13.9188	9.4611	11.7137	14.1688	12.6471	12.4151	15.1921	8.90002	14.2476	18.7946	15.7703	17.3104	18.5873	14.864	15.4929	14.4968	13.0948	12.3023	21.0638	12.564	18.1597
EHD4	EH domain-containing protein 4	cell organization and biogenesis;regulation of biological process;response to stimulus;transport	endoplasmic reticulum;endosome;membrane;nucleus	metal ion binding;nucleotide binding;protein binding	Endocytosis		6	6	6	6	0.975	0.980565	1.117	0.948867		0.896273	1	0.94568	0.834742	0.776942	0.583107	0.983841	1.04734	0.864101	0.922338	1.02061	0.838442	1.00741	0.894634	1.30895	1.14385	0.955074	1.00545	0.995287	0.990284	0.895919	0.809462	0.916798	0.825534
EIF1AY	Eukaryotic translation initiation factor 1A, Y-chromosomal	metabolic process		protein binding;RNA binding	RNA transport	Translation Factors	6	6	25	6	0.78	0.346252	1.045	0.977301		0.758699	0.604227	0.95292	1.39671	1.09258	1.51046	1.14242	1.05317	1.17456	1.12671	1.12039	1.23572	1.25383	1.01566	1.13019	1.34693	1.35366	1.64764	1.31325	0.855821	1.09319	1.37346	1.02118	1.37618
EIF2A	Eukaryotic translation initiation factor 2A	cell organization and biogenesis;metabolic process;regulation of biological process;response to stimulus	cytoplasm	protein binding;RNA binding		VEGFA-VEGFR2 Signaling Pathway; Photodynamic therapy-induced unfolded protein response	6	6	6	6	1.042	0.99965	0.936	0.715994		1.60426	1.27437	1.08832	1.02025	0.702288	0.872548	1.03507	0.910653	1.16091	1.16087	1.08841	0.923451	1.14311	0.812976	0.594492	0.839569	0.947474	1.14154	1.16049	1.32061	1.16647	0.960102	1.0866	1.30338
EIF2S1	Eukaryotic translation initiation factor 2 subunit 1	cell communication;metabolic process;regulation of biological process;response to stimulus;transport	cytoplasm;cytosol;membrane;nucleus;ribosome	protein binding;RNA binding	RNA transport; Protein processing in endoplasmic reticulum; Influenza A; Measles; Apoptosis; Hepatitis C; Herpes simplex infection; Non-alcoholic fatty liver disease (NAFLD)	Brain-Derived Neurotrophic Factor (BDNF) signaling pathway; Translation Factors	6	6	6	6	1.111	0.93977	1.187	0.831178		2.97207	3.07189	3.12245	4.32701	3.90453	4.5576	3.26716	3.97078	3.90224	5.80811	4.81236	4.97394	2.75251	3.68359	3.35521	3.3782	3.24276	3.83494	3.10733	2.98797	3.01324	4.53744	3.80269	3.72604
EIF2S2	Eukaryotic translation initiation factor 2 subunit 2	cell proliferation;metabolic process;transport	cytoplasm;cytosol;nucleus	metal ion binding;protein binding;RNA binding	RNA transport	Brain-Derived Neurotrophic Factor (BDNF) signaling pathway; Translation Factors	6	25	15	6	0.876	0.832272	1.097	0.972033		3.73367	0.195106	0.357419	0.704189	0.546271	0.532695	0.574971	0.516814	0.428563	0.380601	0.633698	0.559615	0.404256	0.372681	0.390209	0.460604	0.442999	0.37678	0.578607	0.3806	0.602223	0.848441	0.816104	1.29463
EIF2S3	Eukaryotic translation initiation factor 2 subunit 3	metabolic process;transport	cytoplasm;cytosol;nucleus	catalytic activity;nucleotide binding;protein binding;RNA binding	RNA transport	Translation Factors	6	6	6	6	1.027	0.99965	1.009	0.948867		2.61294	2.69507	2.86033	3.72641	2.96883	3.28894	3.47065	3.48982	3.17928	3.61843	3.29861	3.49174	3.05636	2.7942	2.78426	1.94255	2.42134	1.98287	2.75878	2.81745	2.63794	3.37211	2.49911	2.72893
EIF3A	Eukaryotic translation initiation factor 3 subunit A	cell organization and biogenesis;metabolic process;regulation of biological process	cytoplasm;cytosol;membrane;nucleus	protein binding;RNA binding;structural molecule activity	RNA transport	Translation Factors	6	6	6	6	1.029	0.99965	1.111	0.948867		10.4064	11.7895	10.8274	11.9219	10.5232	9.99299	8.34362	8.25064	8.46285	9.70105	8.66964	9.83913	9.62585	8.53795	8.44294	10.391	7.62303	7.15966	9.05286	9.60743	8.39545	9.96799	7.72946	7.46323
EIF3B	Isoform 2 of Eukaryotic translation initiation factor 3 subunit B	metabolic process;regulation of biological process	cytosol	protein binding;RNA binding;structural molecule activity		Translation Factors	6	6	6	6	1.065	0.989364	1.161	0.881819		2.42505	3.28982	2.82353	3.4066	2.9954	3.13458	3.17106	2.91915	2.84125	3.40281	2.93447	3.10812	2.80566	2.96633	2.92376	2.77817	2.88102	3.02861	2.48063	2.60099	2.79869	3.46049	3.17803	3.01877
EIF3C	Eukaryotic translation initiation factor 3 subunit C	cell organization and biogenesis;metabolic process;regulation of biological process	cytoplasm;cytosol	protein binding;RNA binding	RNA transport	Translation Factors	6	6	6	6	1.105	0.940895	1.019	0.949635		2.68149	3.13234	2.76325	3.27806	3.22033	2.86431	3.2894	3.36186	3.1226	3.6351	3.47167	3.80788	2.82163	2.70671	2.7089	2.61665	3.01127	2.9422	2.59479	2.37899	2.37012	2.8711	2.70036	2.97073
EIF3D	Eukaryotic translation initiation factor 3 subunit D	cell organization and biogenesis;metabolic process;regulation of biological process	cytoplasm;cytosol;membrane	protein binding;RNA binding	RNA transport	Translation Factors	6	6	6	6	1.153	0.937834	1.235	0.883117		0.0577621	0.0389492	0.0865081	0.0753463	0.0807022	0.0633942	0.0797965	0.0964794	0.0971989	0.0998728	0.12007	0.124449	0.273517	0.342264	0.289163	0.298074	0.345639	0.428905	0.200159	0.227029	0.247204	0.200319	0.181067	0.289377
EIF3E	Eukaryotic translation initiation factor 3 subunit E	metabolic process;regulation of biological process	chromosome;cytoplasm;cytosol;membrane;nucleus	protein binding;RNA binding	RNA transport; Hepatitis C	Translation Factors	6	6	6	6	0.997	0.99965	1.04	0.978079		1.13279	1.49441	1.36407	1.60788	1.4083	1.3864	1.76724	2.03976	1.65754	2.20711	2.06148	2.18662	1.82068	1.72668	1.57905	1.44473	1.63826	1.65487	1.66856	1.48486	1.5112	1.77004	1.62491	1.77014
EIF3F	Eukaryotic translation initiation factor 3 subunit F	cell organization and biogenesis;metabolic process;regulation of biological process	cytoplasm;cytosol;membrane	catalytic activity;protein binding;RNA binding		Translation Factors	6	6	6	6	1.176	0.833955	1.081	0.982888		0.75142	0.596275	0.548199	0.760921	0.76772	0.807404	0.618193	0.697117	0.720149	0.692735	0.727022	0.557594	0.432502	0.471994	0.544815	0.595012	0.460656	0.530477	0.773042	0.808563	0.677814	1.06331	1.13182	0.85877
EIF3I	Eukaryotic translation initiation factor 3 subunit I	cell organization and biogenesis;metabolic process;regulation of biological process	cytoplasm;cytosol	protein binding;RNA binding	RNA transport	Translation Factors	6	6	6	6	1.089	0.976614	1.142	0.921539		2.35849	2.50821	3.29574	2.43108	3.43095	3.25674	2.96417	2.88428	3.47688	2.99757	3.51672	4.32854	3.2011	3.27355	3.31199	3.16322	2.85028	3.13586	2.61401	2.88017	2.96297	3.01663	2.59915	3.0855
EIF3J	Eukaryotic translation initiation factor 3 subunit J	cell organization and biogenesis;metabolic process;regulation of biological process	cytoplasm;cytosol	protein binding;RNA binding	RNA transport	Translation Factors	6	6	15	6	0.968	0.981436	0.821	0.293121		0.910226	0.0972537	0.235363	0.265731	0.568439	0.359846	0.426516	0.422057	0.103095	0.620711	0.494824	0.56705	0.621668	0.609179	0.571431	0.401455	0.454736	0.484785	0.493614	0.523803	0.505154	0.489068	0.438302	0.482322
EIF3K	Eukaryotic translation initiation factor 3 subunit K	metabolic process;regulation of biological process	cytoplasm;cytosol;membrane;nucleus	protein binding;RNA binding			6	6	6	6	1.015	0.999882	0.966	0.836558		0.66329	0.570236	0.588686	0.715657	0.64266	0.69014	0.605321	0.623985	0.646628	0.509165	0.657741	0.824567	0.606876	0.58812	0.655024	0.502021	0.431941	0.538888	0.643825	0.640968	0.451765	0.751407	0.670258	0.463426
EIF3L	Eukaryotic translation initiation factor 3 subunit L	cell organization and biogenesis;metabolic process;regulation of biological process	cytoplasm;cytosol;membrane	protein binding;RNA binding			6	6	6	6	1.016	0.99965	1.071	0.991487		0.974903	1.7876	2.45872	2.67876	2.69896	2.80261	2.19314	2.30349	1.98077	2.2705	2.34762	2.54144	1.35734	1.36077	1.73331	1.04325	1.16908	1.27292	2.74057	2.44124	2.40464	3.0184	2.72555	2.91134
EIF4A1	Eukaryotic initiation factor 4A-I	metabolic process;regulation of biological process	cytoplasm;cytosol;membrane;nucleus	catalytic activity;DNA binding;nucleotide binding;protein binding;RNA binding	RNA transport	Interferon type I signaling pathways; Translation Factors	6	6	6	6	1.157	0.859788	1.076	0.979172		7.21858	7.17641	6.20059	8.79803	7.66981	7.29318	9.12312	10.2432	10.2704	10.9732	10.9657	10.5492	8.27135	9.9863	8.10877	7.65106	8.49726	7.92503	8.22503	8.92254	7.93204	9.99219	9.24838	9.9514
EIF4A3	Eukaryotic initiation factor 4A-III	metabolic process;regulation of biological process;response to stimulus;transport	cytoplasm;cytosol;membrane;nucleus;spliceosomal complex	catalytic activity;nucleotide binding;protein binding;RNA binding	mRNA surveillance pathway; RNA transport; Spliceosome		6	6	25	6	1.475	0.262493	1.382	0.299386		0.0295228	0.27849	0.285063	0.284836	0.343665	0.518862	0.196458	0.542682	0.522927	0.490521	0.614983	0.625251	0.351995	0.297601	0.392529	0.327916	0.359152	0.299429	0.288677	0.679158	0.408675	0.497918	0.411814	0.469155
EIF4B	Eukaryotic translation initiation factor 4B	cell organization and biogenesis;metabolic process;regulation of biological process	cytosol	catalytic activity;protein binding;RNA binding		Translation Factors; Interferon type I signaling pathways; Focal Adhesion-PI3K-Akt-mTOR-signaling pathway	6	6	6	6	0.835	0.450748	1.185	0.814931		3.26581	2.71088	4.5407	5.95056	4.39941	5.08063	2.95593	2.67362	3.02709	3.22128	1.90543	2.6106	3.51225	3.28169	3.89302	4.27997	3.14411	3.19188	5.02944	3.99232	4.79274	4.45927	3.47405	3.2411
EIF4G1	Isoform 8 of Eukaryotic translation initiation factor 4 gamma 1	cell organization and biogenesis;defense response;metabolic process;regulation of biological process;response to stimulus	cytoplasm;cytosol;membrane;nucleus	nucleotide binding;protein binding;RNA binding;structural molecule activity		Translation Factors	6	6	6	6	1.186	0.770519	1.084	0.97627		4.45482	5.45516	5.17651	6.25435	5.97485	5.29303	4.95408	5.3952	4.72489	5.76739	5.62392	5.71194	4.93177	5.80143	4.41408	3.93212	5.18523	4.43205	5.56388	4.39682	4.9275	5.81679	5.01959	5.80119
EIF4G2	Eukaryotic translation initiation factor 4 gamma 2 (Fragment)	cell death;metabolic process;regulation of biological process	cytosol;membrane	protein binding;RNA binding		Exercise-induced Circadian Regulation	6	6	6	6	0.949	0.946042	0.934	0.705236		0.844853	0.883016	1.26617	1.55994	1.30605	1.14596	1.34185	1.07779	0.736832	1.46092	1.23418	1.27645	1.16266	1.10452	0.904493	1.20461	0.998646	1.0462	1.23408	1.19314	1.16893	1.49673	1.16334	1.20974
EIF4H	Eukaryotic translation initiation factor 4H	cell organization and biogenesis;metabolic process;regulation of biological process;reproduction	cytoplasm;cytosol;membrane	catalytic activity;protein binding;RNA binding		Translation Factors	6	6	6	6	0.978	0.973948	1.063	0.999288		3.48697	2.50466	3.14599	5.5214	4.34763	5.57863	3.08837	3.13806	3.20097	4.6143	4.11647	4.1112	3.48906	3.79391	3.25153	4.32281	3.76553	4.42936	4.32972	3.97841	4.23871	5.1896	3.98441	3.87988
EIF5	Eukaryotic translation initiation factor 5	cell organization and biogenesis;metabolic process;regulation of biological process	cytoplasm;cytosol;membrane;nucleus	catalytic activity;nucleotide binding;protein binding;RNA binding	RNA transport	Translation Factors	6	6	6	6	0.901	0.81359	0.985	0.90485		1.76469	1.45932	1.5166	1.80469	1.65692	1.49283	1.60714	1.39942	1.65079	2.56387	1.60401	1.78672	1.86184	2.1354	2.09224	2.59125	2.25953	1.85874	1.27537	1.26854	1.43747	1.46531	1.09075	1.51487
EIF5A	Eukaryotic translation initiation factor 5A-1	metabolic process;regulation of biological process		RNA binding		eIF5A regulation in response to inhibition of the nuclear export system	6	6	6	6	1.005	0.993559	1.12	0.948867		24.772	18.9721	19.472	23.9077	18.3119	21.7857	18.1457	18.2525	19.3247	22.4222	17.009	19.6152	20.5191	20.5423	19.5759	18.9544	19.9584	19.8105	19.8234	17.4218	19.0434	22.5721	16.4477	19.4337
EIF5B	Eukaryotic translation initiation factor 5B	metabolic process;regulation of biological process	cytoplasm;cytosol;nucleus	catalytic activity;metal ion binding;nucleotide binding;protein binding;RNA binding	RNA transport	Translation Factors	6	6	6	6	1.102	0.976614	0.895	0.712475		0.207219	0.158444	0.145977	0.32555	0.295144	0.128425	0.26501	0.220398	0.287188	0.134662	0.194733	0.383156	0.30099	0.36528	0.103968	0.197468	0.292661	0.204986	0.297629	0.245069	0.167725	0.24176	0.411333	0.224384
EIF6	Eukaryotic translation initiation factor 6	cell organization and biogenesis;metabolic process;regulation of biological process;response to stimulus;transport	cytoplasm;cytosol;nucleus	protein binding;RNA binding	Ribosome biogenesis in eukaryotes	Translation Factors	6	6	6	6	0.913	0.823397	1.079	0.984475		4.50899	3.14631	4.24502	3.76696	3.21258	4.28785	2.41942	2.07958	2.32961	2.7891	2.18876	2.90922	2.12558	1.85811	2.23687	1.83522	1.72764	2.06257	1.9061	2.04395	1.76616	2.37761	1.94149	1.94876
ELAVL1	ELAV-like protein 1	development;metabolic process;regulation of biological process	cytoplasm;cytosol;membrane;nucleus	protein binding;RNA binding		Focal Adhesion-PI3K-Akt-mTOR-signaling pathway; Endoderm Differentiation; Preimplantation Embryo; AMP-activated Protein Kinase (AMPK) Signaling	6	6	6	6	0.951	0.934824	1.189	0.810519		2.64489	1.94175	3.1796	2.93374	2.82096	3.18234	4.32174	4.57524	4.87982	5.1247	4.24207	4.73243	3.30629	2.91969	3.54567	3.47046	2.77156	3.55559	3.93873	3.49844	3.69917	3.8011	3.85738	4.45003
ELF1	ETS-related transcription factor Elf-1	cell differentiation;metabolic process;regulation of biological process	nucleus	DNA binding;protein binding			0	8	0	0			100	1.00949e-16		0	0	0	0	0	0	0	0	0	0	0	0	0	0	0	0	0	0	0	0	0.0241546	0	0	0
ELMO2	Engulfment and cell motility protein 2	cell death;cell organization and biogenesis;cellular component movement;regulation of biological process;response to stimulus	cytosol;membrane	protein binding			25	25	6	25	1.042	0.99965	1.093	0.986779		0.245205	0.0986099	0.233047	0.375225	0.203215	0.262384	0.356319	0.161129	0.435534	0.575756	0.2953	0.63631	0.0833122	0.0928851	0.169853	0.448661	0.186551	0.410083	0.275526	0.183448	0.342643	0.4385	0.242819	0.575375
EMC2	ER membrane protein complex subunit 2	metabolic process	cytoplasm;endoplasmic reticulum;mitochondrion;nucleus	protein binding			6	6	6	6	1.094	0.96339	1.286	0.564138		0.360503	0.569694	0.658861	0.467324	0.480014	0.564223	0.203505	0.39774	0.413787	0.409246	0.41307	0.401454	0.365822	0.409587	0.448613	0.133671	0.310185	0.200165	0.243047	0.364005	0.21961	0.268759	0.441142	0.247365
EMC4	ER membrane protein complex subunit 4	cell death;metabolic process	membrane				17	17	17	23	0.903	0.921802	0.998	0.947009		0.439075	0.308019	0.520042	0.119478	0.377425	0.0999332	0.163631	0.17815	0.114723	1.06671	0.17503	0.158955	0.853976	1.06346	0.782966	0.111789	0.368725	0.0315582	0.492266	0.252221	0.444561	0.198128	0.218945	0.138888
EMD	Emerin	cell differentiation;cell organization and biogenesis;regulation of biological process;response to stimulus	cytoplasm;endoplasmic reticulum;membrane;nucleus	protein binding	Dilated cardiomyopathy; Hypertrophic cardiomyopathy (HCM); Arrhythmogenic right ventricular cardiomyopathy (ARVC)	Arrhythmogenic Right Ventricular Cardiomyopathy	6	6	6	6	0.912	0.8133	1.137	0.93251		2.83676	2.93462	3.46753	2.52224	2.25341	2.4523	2.73452	2.29974	2.47512	2.90756	2.33501	2.69006	2.34399	2.15391	2.60932	2.20426	1.89627	2.17388	3.87608	3.07552	3.24205	3.20906	2.74589	2.7967
EML3	Echinoderm microtubule associated protein like 3, isoform CRA_e		cytoplasm;cytoskeleton	protein binding			6	6	6	6	1.35	0.466856	1.335	0.629247		0.202039	0.203583	0.217315	0.23875	0.170516	0.288867	0.0948452	0.320454	0.263507	0.240819	0.191353	0.287747	0.082	0.101784	0.21458	0.117175	0.103715	0.156604	0.126997	0.337781	0.110133	0.146756	0.287272	0.216527
EML4	Echinoderm microtubule-associated protein-like 4		cytoplasm;cytoskeleton;membrane	protein binding			6	6	6	6	0.865	0.720657	1.097	0.97627		1.07276	0.928224	1.42738	1.89123	1.35288	1.41228	1.2665	1.22485	1.2333	1.84544	1.50443	1.55012	0.906891	0.64502	0.667887	1.05865	1.27993	0.840848	1.62931	1.5918	1.86113	2.11964	1.91477	2.23054
ENAH	Isoform 2 of Protein enabled homolog	cellular component movement	cytoskeleton;cytosol;membrane	protein binding		Regulation of Actin Cytoskeleton	6	6	6	6	1.128	0.922104	0.998	0.948867		4.34822	5.56682	3.51755	7.00404	8.38371	5.3738	5.97139	5.07139	5.66401	4.37121	6.15444	5.64281	4.71197	7.01817	3.20416	4.13992	5.469	3.94048	6.06233	7.31802	5.81603	6.86844	8.2786	5.34799
ENDOD1	Endonuclease domain-containing 1 protein	metabolic process;transport	cytosol;extracellular;membrane	catalytic activity;metal ion binding			6	6	6	6	1.017	0.99965	1.128	0.948867		0.998232	1.30935	1.20322	0.724364	0.838091	0.890259	1.16198	0.998575	1.01192	0.772032	1.07374	1.08247	1.3209	1.14654	1.37483	1.04423	0.999573	1.23641	1.00284	1.11978	1.11442	0.673543	0.843163	0.954834
ENG	Endoglin	cell differentiation;cell organization and biogenesis;cellular component movement;regulation of biological process;response to stimulus;transport	cell surface;membrane	catalytic activity;protein binding;receptor activity;signal transducer activity;transporter activity		TGF-beta Receptor Signaling; Hypothesized Pathways in Pathogenesis of Cardiovascular Disease	6	6	17	6	0.93	0.925154	1.08	0.988545		1.27994	0.940302	0.762709	0.533679	0.621225	0.399397	1.43302	1.19669	2.01132	1.12239	1.10138	1.13696	1.95164	1.8554	1.44231	1.07849	0.957571	1.46474	1.18016	0.834993	1.37542	0.897899	0.720683	1.60164
ENO1	Isoform MBP-1 of Alpha-enolase	metabolic process;regulation of biological process;response to stimulus	cell surface;cytoplasm;cytosol;membrane;nucleus	catalytic activity;DNA binding;metal ion binding;protein binding;RNA binding		Glycolysis and Gluconeogenesis	6	6	6	6	1.319	0.349132	1.042	0.986522		13.5452	24.9383	15.838	17.1124	15.9385	13.9449	13.5868	14.1248	13.239	18.4406	13.5165	14.3139	9.36819	14.2729	9.05434	8.47041	8.40369	7.25762	12.9788	14.865	11.4192	12.7715	9.52566	9.79871
ENO2	Gamma-enolase	metabolic process	cytoplasm;cytosol;membrane	catalytic activity;metal ion binding;protein binding	RNA degradation; HIF-1 signaling pathway; Biosynthesis of amino acids; Carbon metabolism; Metabolic pathways; Glycolysis / Gluconeogenesis	Glycolysis and Gluconeogenesis	6	6	6	6	0.704	0.200441	0.945	0.787375		0.454359	0.335873	0.453131	0.593656	0.437235	0.347231	0.533526	0.240673	0.426618	0.676839	0.236093	0.31903	0.684899	0.634923	0.55576	0.608357	0.474547	0.55762	0.654015	0.432664	0.580047	0.670543	0.188823	0.294271
EOGT	EGF domain-specific O-linked N-acetylglucosamine transferase	metabolic process	endoplasmic reticulum;organelle lumen	catalytic activity	Other types of O-glycan biosynthesis		10	6	10	6	1.52	0.150499	0.874	0.612322		0.297144	0.58278	0.291024	0.645961	1.02277	0.309479	0.749066	0.890426	0.443077	0.653107	0.915849	0.485704	0.406452	0.885338	0.287104	0.382306	0.986217	0.376426	0.287801	0.424026	0.338328	0.463697	0.780491	0.434652
EPB41L2	Band 4.1-like protein 2	cell organization and biogenesis	cytoskeleton	protein binding;structural molecule activity			6	6	6	6	0.749	0.368483	1.316	0.356904		6.43481	4.61307	6.57996	7.91363	4.71217	8.56162	5.74541	5.16874	5.14927	8.40297	6.04044	8.25365	6.57786	4.67569	6.24103	8.29325	5.74859	9.33871	7.7003	6.97799	6.94766	10.9986	6.30533	8.87412
EPHA2	Ephrin type-A receptor 2	cell death;cell differentiation;cell organization and biogenesis;cell proliferation;cellular component movement;defense response;development;metabolic process;regulation of biological process;response to stimulus	cell surface;membrane	catalytic activity;nucleotide binding;protein binding;receptor activity;signal transducer activity	Ras signaling pathway; PI3K-Akt signaling pathway; Rap1 signaling pathway; Axon guidance	NRF2 pathway; Focal Adhesion-PI3K-Akt-mTOR-signaling pathway	18	25	28	24	100	8.91795e-17	100	1.00949e-16		0	0	0.0504651	0.131507	0.104519	0.130441	0	0	0	0	0.329335	0.109006	0	0	0.0506964	0	0.05865	0.0702324	0	0.029128	0.29121	0.258615	0.298713	0.215128
EPHX1	Epoxide hydrolase 1	metabolic process;response to stimulus	endoplasmic reticulum;membrane	catalytic activity;protein binding	Bile secretion; Chemical carcinogenesis; Metabolism of xenobiotics by cytochrome P450	Metapathway biotransformation; Benzo(a)pyrene metabolism; Photodynamic therapy-induced NFE2L2 (NRF2) survival signaling; Aflatoxin B1 metabolism; Benzene metabolism	6	6	6	17	1.016	0.99965	1.137	0.94045		0.713222	0.818291	1.02796	0.685555	0.182608	0.920209	1.79204	2.2219	1.78363	0.746998	0.24815	1.65688	1.32356	0.949968	1.51414	1.28142	0.296495	1.60012	0.955104	0.965504	1.0367	0.891955	0.273507	1.20561
EPN1	Isoform 2 of Epsin-1	cell organization and biogenesis;regulation of biological process;response to stimulus;transport	cytosol;membrane;nucleus	protein binding		EGF/EGFR Signaling Pathway; VEGFA-VEGFR2 Signaling Pathway	18	26	0	24	0.01	8.91795e-17	0.103	4.47836e-14		0	0	0	0	0	0	0.0329162	0	0.0342452	0	0.0743365	0.0525476	0.0473525	0	0	0	0.0320547	0.0835956	0	0	0	0	0.0451288	0
EPRS	Bifunctional glutamate/proline--tRNA ligase	cell organization and biogenesis;metabolic process;regulation of biological process;response to stimulus	cytoplasm;cytosol;membrane	catalytic activity;metal ion binding;nucleotide binding;protein binding;RNA binding	Porphyrin and chlorophyll metabolism; Aminoacyl-tRNA biosynthesis; Metabolic pathways	Amino Acid metabolism; Parkinsons Disease Pathway	6	6	6	6	0.928	0.88503	0.996	0.948867		7.05699	6.28873	7.48381	9.25279	7.42504	7.45845	8.467	7.33647	6.61701	7.84446	7.5704	7.44395	7.05023	6.95983	6.00558	4.48997	5.14886	4.95379	9.50409	7.79356	8.45737	11.0221	7.27574	6.9269
EPS15	Epidermal growth factor receptor substrate 15	cell organization and biogenesis;cell proliferation;metabolic process;regulation of biological process;response to stimulus;transport	cytoplasm;cytoskeleton;cytosol;endosome;membrane;nucleus	catalytic activity;DNA binding;metal ion binding;motor activity;protein binding	Endocytosis	VEGFA-VEGFR2 Signaling Pathway; EGF/EGFR Signaling Pathway	6	6	15	6	1.013	0.99965	1.368	0.66157		0.209617	0.0314266	0.0541546	0.133657	0.184038	0.0709591	0.169375	0.162659	0.191434	0.231696	0.209921	0.201301	0.13596	0.178248	0.150067	0.1731	0.0665062	0.173403	0.110298	0.063676	0.0617594	0.151363	0.17878	0.156313
EPS15L1	Isoform 2 of Epidermal growth factor receptor substrate 15-like 1	cell differentiation;cell organization and biogenesis;cellular component movement;metabolic process;regulation of biological process;response to stimulus;transport	cytoplasm;cytoskeleton;cytosol;Golgi;membrane;nucleus	catalytic activity;metal ion binding;motor activity;nucleotide binding;protein binding;structural molecule activity;transporter activity		EGF/EGFR Signaling Pathway	6	6	6	6	1.146	0.934824	1.305	0.626086		0.210933	0.265388	0.247639	0.368744	0.404788	0.377127	0.305124	0.34902	0.355367	0.337542	0.376815	0.429778	0.198413	0.219101	0.303758	0.438709	0.346735	0.428415	0.270554	0.290311	0.31251	0.39885	0.31249	0.293599
EPS8	Epidermal growth factor receptor kinase substrate 8	cell organization and biogenesis;cell proliferation;cellular component movement;regulation of biological process;response to stimulus	cytoplasm;membrane	protein binding		EGF/EGFR Signaling Pathway	6	6	6	6	1.147	0.881091	1.113	0.954045		1.22963	1.41613	1.3133	0.715038	0.655983	1.20634	0.818803	1.20688	0.629274	0.748699	1.2117	1.0388	1.05788	0.986655	1.45012	0.753774	0.997166	1.13188	0.762803	1.11348	1.01525	0.675119	0.946919	0.842698
ERC1	ELKS/Rab6-interacting/CAST family member 1	development;metabolic process;regulation of biological process;transport	cytoplasm;endoplasmic reticulum;membrane	protein binding			17	6	6	6	0.983	0.988928	1.207	0.941276		0.152324	0.0871027	0.122489	0.106037	0.0999386	0.119079	0.112205	0.0978546	0.198657	0.0951574	0.103755	0.221311	0.189778	0.16136	0.0957862	0.112677	0	0.045114	0.0705179	0.0460361	0.035553	0.0236834	0.0521925	0.0708923
ERCC6	DNA excision repair protein ERCC-6	metabolic process;regulation of biological process;response to stimulus	cytosol;Golgi;nucleus	catalytic activity;DNA binding;enzyme regulator activity;nucleotide binding;protein binding	Nucleotide excision repair		25	24	14	6	0.01	8.91795e-17	1.118	0.978079		0.310772	0	0.291849	0.193103	0.169854	0.136262	0.0320448	0.137244	0.143838	0	0.227753	0.204772	0.242636	0	0.224077	0.300386	0.220717	0.246906	0.0492656	0	0.0686252	0.0395523	0.1445	0
ERH	Enhancer of rudimentary homolog	metabolic process;regulation of biological process		DNA binding;nucleotide binding;protein binding;RNA binding			6	6	25	6	0.954	0.955513	1.212	0.757795		0.902811	0.434014	1.12116	1.04429	0.945732	1.95929	1.42283	1.40532	1.60448	1.36398	1.89947	1.74647	0.97795	0.963679	1.38927	0.926083	0.944739	1.45584	1.17153	1.15794	1.42664	1.47488	1.49356	1.78839
ERLIN1	Erlin-1	metabolic process;regulation of biological process;response to stimulus;transport	endoplasmic reticulum;membrane	protein binding			6	6	6	6	1.248	0.697125	1.342	0.334065		0.185057	0.470885	0.472594	0.462433	0.617069	0.752472	0.636085	0.923416	0.73597	0.383245	0.651886	0.644885	0.42223	0.396312	0.63706	0.513297	0.584919	0.534486	0.498097	0.590732	0.472123	0.685756	0.732963	0.784057
ERLIN2	Erlin-2	metabolic process;regulation of biological process;response to stimulus;transport	cytosol;endoplasmic reticulum;membrane	catalytic activity;protein binding			23	6	25	6	1.263	0.73274	1.323	0.621008		0.042466	0.146451	0.271662	0.351657	0.464212	0.495583	0.321422	0.536988	0.39891	0.358317	0.366596	0.353101	0.0726691	0.0669156	0.0873542	0.338036	0.0960687	0.0692824	0.237995	0.227396	0.263876	0.280046	0.339626	0.320265
ERO1L	ERO1-like protein alpha	cell death;cell differentiation;cell organization and biogenesis;cellular homeostasis;metabolic process;regulation of biological process;response to stimulus;transport	endoplasmic reticulum;membrane;organelle lumen	catalytic activity;protein binding	Protein processing in endoplasmic reticulum; Vibrio cholerae infection		6	6	6	6	1.525	0.075701	1.056	0.990978		0.632433	0.991414	0.71663	0.762086	1.14941	0.661951	1.06758	1.11849	0.949525	1.09803	0.986621	0.860387	0.637903	1.11905	0.572772	0.587414	0.803977	0.696037	0.577063	0.894284	0.579769	0.661867	0.699993	0.586392
ERP29	Endoplasmic reticulum resident protein 29	metabolic process;regulation of biological process;transport	cell surface;endoplasmic reticulum;membrane;organelle lumen	catalytic activity;protein binding	Protein processing in endoplasmic reticulum		6	6	6	6	1.024	0.99965	1.027	0.97627		8.2627	5.62233	7.07976	5.19697	6.25575	6.13921	4.40991	3.92357	4.09855	4.89549	4.46945	4.58835	9.54816	4.82795	4.53263	3.62446	4.57328	4.13077	4.30907	5.29863	4.34391	3.57419	4.03668	3.33621
ERP44	Endoplasmic reticulum resident protein 44	cellular homeostasis;metabolic process;regulation of biological process;response to stimulus;transport	cell surface;endoplasmic reticulum;extracellular;membrane;organelle lumen	catalytic activity;metal ion binding;protein binding			6	6	6	6	0.903	0.790279	1.057	0.998304		4.60718	3.85501	4.62739	4.61217	4.54032	5.53208	3.15875	3.39985	3.40845	3.86148	3.05218	3.0743	2.6585	2.97372	2.61367	3.08039	2.90278	3.41721	4.05936	3.07304	4.22795	3.16584	3.74733	2.3076
ESD	S-formylglutathione hydrolase	metabolic process	cytoplasm;organelle lumen	catalytic activity;protein binding	Carbon metabolism	Phase I biotransformations, non P450	6	6	6	6	0.92	0.859191	1.117	0.948867		5.50646	5.13685	4.68292	4.10276	4.18838	3.95411	4.98695	5.27458	5.37172	4.78029	4.51419	4.79791	4.8486	4.50387	4.61795	4.38851	3.8628	4.61824	4.29808	3.67148	3.83407	3.79382	3.05487	3.58443
ESYT1	Isoform 2 of Extended synaptotagmin-1	metabolic process;transport	endoplasmic reticulum;membrane	metal ion binding;protein binding			6	6	6	6	1.145	0.886951	0.932	0.777502		4.92783	6.53293	4.78461	4.93462	4.85543	3.37918	4.45607	4.88815	4.16964	5.45426	4.98667	3.78938	5.23889	6.1604	4.01101	4.80519	5.19129	4.57428	5.12281	6.04858	4.98555	5.1272	5.19737	4.90973
ESYT2	Isoform 2 of Extended synaptotagmin-2	metabolic process;transport	membrane	metal ion binding;protein binding			6	6	6	6	1.034	0.99965	0.923	0.705236		0.97497	1.28346	1.57895	1.31463	1.2975	1.16091	1.71016	1.29673	1.49057	1.34003	1.34366	1.3913	1.59444	1.69631	1.36662	1.2052	1.49859	1.62619	1.96846	1.74821	1.79576	1.79496	1.3241	1.51378
ETF1	Eukaryotic peptide chain release factor subunit 1	cell organization and biogenesis;metabolic process;regulation of biological process	cytoplasm;cytosol;nucleus	protein binding;RNA binding	mRNA surveillance pathway	Translation Factors	6	6	6	6	1.055	0.988928	1.029	0.96172		0.534963	0.551091	0.477938	0.653477	0.592923	0.588712	0.759908	0.773519	0.730518	0.603715	0.64404	0.67714	0.674772	0.736761	0.665836	0.514935	0.60184	0.509371	0.415291	0.509564	0.449202	0.598514	0.517876	0.567305
ETFA	Electron transfer flavoprotein subunit alpha, mitochondrial	metabolic process;transport	mitochondrion;organelle lumen	catalytic activity;nucleotide binding;protein binding			6	6	6	6	1.112	0.942567	1.315	0.387607		0.706159	0.383925	0.627528	0.353349	0.508877	0.628189	0.506113	0.741948	0.655627	0.352052	0.645089	0.45921	0.535218	0.539986	0.761228	0.499207	0.420313	0.59317	0.340756	0.423902	0.369362	0.274914	0.450995	0.412281
ETFB	Isoform 2 of Electron transfer flavoprotein subunit beta						6	6	6	6	1.107	0.940895	1.239	0.637676		5.30595	5.31816	5.98377	3.48088	4.80286	5.83336	3.67698	5.08709	4.43948	3.03476	4.13731	3.80099	2.59943	2.80243	4.42975	2.8184	3.37106	2.59999	3.64043	4.24755	3.34104	3.22445	4.70942	4.0263
ETHE1	Persulfide dioxygenase ETHE1, mitochondrial	metabolic process	cytoplasm;mitochondrion;organelle lumen	catalytic activity;metal ion binding			6	6	6	6	0.963	0.979508	1.046	0.979172		0.585886	0.308384	0.571974	0.244339	0.256995	0.410835	0.6677	0.706715	0.709187	0.647574	0.631712	0.638229	0.617518	0.569511	0.738698	0.493831	0.413915	0.454031	0.405563	0.431199	0.388075	0.330042	0.404087	0.471272
EVA1B	Protein eva-1 homolog B		membrane	protein binding			19	0	0	20			100	1.00949e-16		0	0	0	0	0	0	0	0	0	0	0	0.0261157	0	0	0.0382116	0.0268599	0	0.0320845	0	0	0	0	0	0
EWSR1	Isoform 5 of RNA-binding protein EWS	metabolic process;regulation of biological process	cytoplasm;membrane;nucleus	metal ion binding;protein binding;RNA binding			6	6	6	6	0.9	0.81474	1.433	0.0905614		1.62344	1.6236	2.41969	2.33281	2.09655	2.65577	1.50523	1.68356	1.91832	1.40924	1.9617	2.14134	1.57018	1.30834	1.95969	1.71963	1.27102	1.61316	1.56352	1.41964	1.68206	1.92743	1.84426	2.17649
EXOC1	Exocyst complex component 1	defense response;regulation of biological process;response to stimulus;transport	cytoplasm;cytosol;membrane	protein binding			6	6	6	6	1.269	0.605988	1.311	0.348059		0.549027	0.775468	0.627497	0.723937	0.578777	0.533146	0.600526	0.864944	0.706808	0.447605	0.778562	0.812687	0.626448	0.573958	0.688632	0.65248	0.693707	0.78414	0.230923	1.15221	0.746997	0.975188	0.875233	0.70362
EXOC2	Exocyst complex component 2	cell organization and biogenesis;regulation of biological process;transport	cytosol;membrane	protein binding	Ras signaling pathway	RalA downstream regulated genes	6	6	6	6	1.091	0.979508	1.051	0.978079		0.121119	0.178721	0.152248	0.122715	0.121393	0.0496479	0.171604	0.173631	0.178272	0.230396	0.212467	0.230403	0.219199	0.17966	0.237208	0.155579	0.222309	0.189346	0.0939859	0.138565	0.117466	0.0785953	0.119102	0.160427
EXOC4	Exocyst complex component 4	cell communication;cell organization and biogenesis;regulation of biological process;transport	cytoplasm;cytosol;membrane	protein binding	Tight junction		6	6	9	6	1.011	0.99965	0.957	0.873756		0.0332243	0	0.012933	0.0892629	0	0.0426734	0.123451	0.200609	0.124816	0.10601	0.188634	0.167787	0.139423	0.140363	0.191286	0.172964	0.188521	0.179242	0.244768	0.224525	0.19885	0.232615	0.211104	0.275002
EXOC6B	Exocyst complex component 6B	transport		protein binding			6	6	4	6	1.013	0.99965	1.136	0.948867		0	0.264247	0.239047	0.194017	0.154998	0.0123998	0.411181	0.366833	0.307797	0.293367	0.371391	0.380017	0.276596	0.257372	0.255981	0.47117	0.356373	0.366652	0.263644	0.285249	0.193554	0.271535	0.232586	0.244278
EXOC7	Exocyst complex component 7	regulation of biological process;transport	cytoplasm;cytosol;membrane	protein binding	Insulin signaling pathway	Angiopoietin Like Protein 8 Regulatory Pathway	3	3	10	6	1.828	0.000712959	0.534	1.82223e-06		25.1824	56.1539	11.7383	26.9875	52.6839	6.56493	26.8578	19.9055	15.2913	35.924	23.9439	12.8722	15.383	29.0609	3.50196	10.4058	17.7822	7.83458	22.8015	41.7721	20.4114	11.0345	16.3719	5.73203
EXOSC2	Exosome complex component RRP4	metabolic process;regulation of biological process	cytoplasm;cytosol;nucleus	catalytic activity;protein binding;RNA binding	RNA degradation		14	19	19	25	0.01	8.91795e-17	100	1.00949e-16		0.0876187	0	0.456222	0.126724	0.23542	0.297564	0	0	0.179046	0.262464	0.135805	0.295602	0.107718	0	0.156254	0.0589518	0.051973	0.060797	0	0.101803	0.61743	0	0.326986	0.123828
EZR	Ezrin	cell differentiation;cell organization and biogenesis;cellular component movement;metabolic process;regulation of biological process;response to stimulus;transport	cytoplasm;cytoskeleton;cytosol;endosome;membrane	protein binding;RNA binding	Leukocyte transendothelial migration; Pathogenic Escherichia coli infection; Proteoglycans in cancer; Gastric acid secretion; Regulation of actin cytoskeleton; MicroRNAs in cancer	AGE/RAGE pathway; Regulation of Actin Cytoskeleton; VEGFA-VEGFR2 Signaling Pathway; Pathogenic Escherichia coli infection	6	6	6	6	1.398	0.176799	0.924	0.750367		4.03873	4.19437	3.23398	7.45746	6.31008	3.96167	3.33297	4.37646	3.3619	6.08348	5.33499	3.82292	5.29944	7.61807	3.39575	8.87677	7.80731	6.59831	6.38786	7.85368	4.77941	6.45513	7.08049	5.01489
F8W031	Uncharacterized protein (Fragment)	regulation of biological process;response to stimulus	endoplasmic reticulum				6	6	6	6	1.136	0.889924	1.178	0.844747		2.6769	3.27556	3.17165	2.55513	3.70128	4.53283	2.97301	3.19113	3.19436	2.27817	3.28039	2.97928	2.25483	2.51929	3.00299	2.38583	2.75325	2.39945	1.99528	2.52273	2.03828	2.30874	2.9206	2.33662
FABP3	Fatty acid-binding protein, heart	metabolic process;regulation of biological process;response to stimulus;transport	cytoplasm;cytosol	protein binding;transporter activity	PPAR signaling pathway	PPAR signaling pathway	6	17	15	6	0.692	0.17587	0.781	0.20171		0.465664	0.113005	0.218775	0.124036	0.204893	0.0697023	0.300536	0.225115	0.244238	0.204397	0.189195	0.111801	0.23174	0.2413	0.171321	0.193385	0.172505	0.149593	0.415971	0.237205	0.282025	0.185938	0.0968211	0.104405
FABP5	Fatty acid-binding protein, epidermal	metabolic process;transport	cytoplasm;cytosol;extracellular;membrane;organelle lumen	protein binding;transporter activity	PPAR signaling pathway	PPAR signaling pathway	25	25	14	18	0.84	0.708161	1.878	4.68217e-05		0.375334	0.164725	0.503834	0.316723	0.263059	0.730069	0.819608	1.04194	1.55016	1.20956	1.34192	3.14644	0.608967	0.406774	1.64089	1.15348	0.754843	1.58065	0.729956	0.710935	1.21564	1.81083	1	3.25852
FADS2	Fatty acid desaturase 2	metabolic process;transport	endoplasmic reticulum;membrane	catalytic activity	alpha-Linolenic acid metabolism; PPAR signaling pathway; Fatty acid metabolism; Biosynthesis of unsaturated fatty acids	PPAR signaling pathway	1	10	10	10	1.855	0.00846314	0.46	1.34283e-05		0.206957	1.00491	0.260071	0.767062	0.817423	0.323708	0.167012	0.193235	0.0540811	0.313265	0.371807	0.137901	0.131024	1.16933	0.0320424	0.117221	0.217999	0.0989009	0.366873	0.660469	0.192449	0.400358	0.64812	0.197248
FAHD2A	Fumarylacetoacetate hydrolase domain-containing protein 2A	metabolic process		catalytic activity;metal ion binding			6	6	6	6	1.668	0.0883485	1.374	0.662259		0.172409	0.17551	0.133785	0.1112	0.133374	0.149956	0.104183	0.178526	0.139201	0.0858651	0.128543	0.149858	0.0658155	0.123099	0.153872	0.0860302	0.16357	0.227259	0.0772105	0.132396	0.0898038	0.0667437	0.103815	0.0994833
FAM103A1	RNMT-activating mini protein	cell organization and biogenesis;metabolic process	nucleus	catalytic activity;protein binding;RNA binding			22	11	14	15	0.074	8.91795e-17	0.895	0.699922		0.161545	0	0.136513	0	0	0.18303	0.195809	0	0.0472984	0.0418261	0.0444886	0.0483581	0.112559	0.0636737	0.145902	0	0	0	0	0.119884	0	0.0289754	0.0481951	0
FAM114A1	Protein NOXP20		cytoplasm;cytosol;Golgi;nucleus	protein binding			6	6	6	6	0.994	0.989925	1.056	0.990978		2.17771	1.90691	1.9962	2.35197	1.95844	1.7743	1.33355	1.99762	1.86434	1.99418	2.19353	2.45187	2.25996	2.13265	1.86732	1.60795	1.85382	2.06295	1.3929	1.20642	1.31473	1.38547	1.08849	1.35438
FAM120A	Isoform F of Constitutive coactivator of PPAR-gamma-like protein 1		cytosol;membrane;nucleus	RNA binding			6	6	6	6	1.105	0.940895	1.138	0.941276		0.925614	1.56911	1.14436	1.50822	1.30092	1.19336	1.52903	1.51775	1.34154	1.44765	1.4628	1.57176	1.20636	1.17291	1.23866	0.791729	0.943485	0.846675	1.16571	1.35324	1.34112	1.61966	1.72542	1.88234
FAM129A	Protein Niban	regulation of biological process;response to stimulus	cytoplasm;cytosol;membrane	protein binding			17	17	23	17	0.455	7.0414e-05	0.645	0.000188689		0.632345	0.36206	0.268113	0.705237	0.362334	0.123471	1.13814	0.511173	0.581603	0.592982	0.385403	0.282693	0.572886	0.313009	0.282338	0.0928541	0.107318	0.0493977	1.48004	0.612266	0.881841	0.860883	0.224537	0.192205
FAM129B	Niban-like protein 1	cell differentiation;cellular component movement;metabolic process;regulation of biological process;transport	cytoplasm;cytosol;membrane;nucleus	protein binding			6	6	6	6	1.181	0.789319	1.128	0.948867		0.929518	0.779158	0.919408	1.15395	0.926442	1.14973	1.83465	2.46271	2.78246	0.808388	1.67701	2.29056	1.41887	1.52303	1.59394	1.01924	1.42965	0.960264	1.57259	1.63743	1.65128	2.11327	2.07724	2.24147
FAM160B1	Protein FAM160B1						17	6	19	28	1.029	0.99965	1.284	0.881819		0.0545927	0.0552503	0.185697	0.0532536	0.0528632	0.0463401	0	0	0	0.111844	0.184605	0.127317	0.110694	0.0509706	0.0454803	0.0624785	0	0.0628397	0.0501337	0.0536179	0	0.0424187	0.0502065	0.0897917
FAM177A1	Isoform 2 of Protein FAM177A1						28	14	28	18	0.01	8.91795e-17	0.113	1.00949e-16		0	0	0.0434637	0.552469	0.556562	0.279243	0.242027	0.0432323	0	0.0441103	0.0528444	0.295658	0.0650173	0	0	0.203807	0.25922	0.319141	0.166409	0	0.213689	0.240577	0.162116	0.164965
FAM21A	WASH complex subunit FAM21A	transport	cytosol;endosome;membrane		Endocytosis		6	6	6	6	1.425	0.326222	1.143	0.930766		0.508523	0.4447	0.533131	0.340348	0.358917	0.725355	0.407463	0.563705	0.382744	0.492985	0.49539	0.602937	0.298517	0.583142	0.540556	0.352995	0.558788	0.352897	0.22722	0.402539	0.268903	0.276771	0.26756	0.145499
FAM3C	Protein FAM3C	cell differentiation;cell organization and biogenesis;cell proliferation;development;regulation of biological process;response to stimulus;transport	cytoplasm;extracellular;organelle lumen	protein binding		Wnt Signaling Pathway; DNA Damage Response (only ATM dependent); Wnt Signaling Pathway and Pluripotency	6	6	6	6	1.561	0.0368308	1.522	0.0279542		0.797635	1.74302	0.963824	1.60776	2.23278	2.03139	0.956406	1.17784	0.860979	1.26111	1.62004	1.56344	0.95325	1.63512	1.30493	1.04431	1.28544	1.24328	1.16629	2.14646	1.55499	1.18	2.07037	1.14257
FAM50A	Protein FAM50A		nucleus	RNA binding			6	6	6	6	0.854	0.860718	1.159	0.967859		0.115521	0.0828266	0.133792	0.146248	0.158353	0.21182	0.0327634	0.0312358	0.0360216	0.0619442	0.0474265	0.0424326	0.0974341	0.148938	0.169286	0.135806	0.143027	0.176404	0.101705	0.0443982	0.0729003	0.0691999	0.0895138	0.0870376
FAM98A	Protein FAM98A	metabolic process;regulation of biological process		catalytic activity;protein binding;RNA binding			6	6	17	6	1.02	0.999882	0.823	0.182545		2.45437	1.43293	1.13192	0.881382	0.794016	1.0636	0.565095	0.531812	0.346076	0.856939	0.676245	0.606031	1.4932	1.12566	1.32456	0.625427	1.13174	0.827055	1.10851	0.768698	1.10367	0.480323	1.13653	0.846391
FAM98B	Isoform 2 of Protein FAM98B	metabolic process;regulation of biological process	cytoplasm;nucleus	catalytic activity;protein binding;RNA binding			6	6	6	6	0.883	0.814566	0.935	0.715582		0.99938	1.02699	0.854036	1	0.873466	1.04257	0.980584	1.00804	1.0787	1.19343	0.400918	1.07456	0.63238	0.64105	0.84576	0.88158	0.437873	0.487597	0.674589	0.67418	0.285759	0.351518	0.304812	0.654402
FAP	Seprase	cell death;cell proliferation;cellular component movement;metabolic process;regulation of biological process	cell surface;cytoplasm;extracellular;membrane	catalytic activity;protein binding			6	6	14	6	0.841	0.748168	1.19	0.816836		0.398246	0.197917	0.731694	0.381971	0.442073	0.82344	0.452453	0.288743	0.561617	0.537381	0.356971	0.439142	0.567146	0.404616	0.835132	0.704468	0.508375	0.830532	0.41174	0.415779	0.429559	0.355595	0.296825	0.474042
FARP1	FERM, RhoGEF and pleckstrin domain-containing protein 1	cell organization and biogenesis;regulation of biological process	cytoskeleton;cytosol	protein binding			6	6	3	6	0.871	0.817625	1.112	0.996217		0.0519373	0.0912277	0.063827	0.0733414	0.0639881	0	0.16698	0.163196	0.168307	0.0698077	0.150198	0.0875657	0.16246	0.142391	0.161766	0.113238	0.0984722	0.10685	0.10041	0.0406122	0.103227	0.0771974	0.128919	0.106988
FARSA	Phenylalanine--tRNA ligase alpha subunit	metabolic process;regulation of biological process	cytoplasm	catalytic activity;nucleotide binding;RNA binding			6	6	6	6	0.973	0.987564	1.04	0.982079		0.511413	0.431675	0.321192	0.518502	0.357973	0.593871	0.409448	0.439707	0.394747	0.380376	0.452857	0.594313	0.448727	0.351405	0.319781	0.438463	0.255497	0.405327	0.391004	0.343192	0.439878	0.672664	0.367526	0.440647
FARSB	Phenylalanine--tRNA ligase beta subunit	cell organization and biogenesis;metabolic process	cytoplasm;cytosol;membrane	catalytic activity;metal ion binding;nucleotide binding;protein binding;RNA binding	Aminoacyl-tRNA biosynthesis	Amino Acid metabolism	6	6	6	6	1.003	0.99965	1.174	0.847261		0.799223	0.671555	0.835126	0.889862	0.841045	0.915375	0.528315	0.894796	0.737038	0.715092	0.791267	0.920335	0.811132	0.758417	0.766112	0.465018	0.667025	0.729654	0.859844	0.994325	0.947207	0.99737	1.08084	1.25279
FAS	Tumor necrosis factor receptor superfamily member 6	cell communication;cell death;cell organization and biogenesis;defense response;development;metabolic process;regulation of biological process;response to stimulus	cell surface;cytosol;extracellular;membrane;mitochondrion	protein binding;receptor activity;signal transducer activity	Allograft rejection; African trypanosomiasis; Non-alcoholic fatty liver disease (NAFLD); Proteoglycans in cancer; Type I diabetes mellitus; TNF signaling pathway; Graft-versus-host disease; Alzheimer's disease; Pathways in cancer; Measles; MAPK signaling pathway; p53 signaling pathway; Cytokine-cytokine receptor interaction; Platinum drug resistance; Autoimmune thyroid disease; Hepatitis B; Influ…	Nanomaterial induced apoptosis; miRNA Regulation of DNA Damage Response; VEGFA-VEGFR2 Signaling Pathway; Apoptosis Modulation by HSP70; Fas Ligand (FasL) pathway and Stress induction of Heat Shock Proteins (HSP) regulation; Adipogenesis; Alzheimers Disease; DNA Damage Response; Allograft Rejection; MAPK Signaling Pathway; Apoptosis; T-Cell antigen Receptor (TCR) Signaling Pathway	0	6	28	17	0.851	0.726968	0.954	0.873835		0	0	0.0476343	0.0481383	0.080569	0.054142	0.151199	0.160607	0.139424	0.13625	0	0.0825162	0	0	0	0	0	0	0.196708	0.128251	0.173851	0.166687	0.154251	0.159275
FASN	Fatty acid synthase	cell differentiation;metabolic process;regulation of biological process;response to stimulus	cytoplasm;cytosol;Golgi;membrane;mitochondrion	catalytic activity;nucleotide binding;protein binding;RNA binding	AMPK signaling pathway; Insulin signaling pathway; Metabolic pathways; Fatty acid biosynthesis; Fatty acid metabolism	SREBF and miR33 in cholesterol and lipid homeostasis; Angiopoietin Like Protein 8 Regulatory Pathway; AMP-activated Protein Kinase (AMPK) Signaling; Liver X Receptor Pathway; Fatty Acid Biosynthesis; Sterol Regulatory Element-Binding Proteins (SREBP) signalling	6	6	6	6	1.718	0.00358128	1.041	0.986467		8.01781	13.5141	6.83842	9.37488	11.5206	6.99928	7.18071	13.5311	7.77064	9.21316	13.0375	8.77442	7.05417	8.98886	5.90686	7.31454	9.58369	7.03346	7.08751	10.9614	7.89996	7.97791	13.2837	9.2597
FAU	40S ribosomal protein S30	metabolic process	ribosome	structural molecule activity			6	6	6	6	1.049	0.99965	0.994	0.948767		7.64319	7.65066	6.47111	7.38298	6.84925	7.04657	4.8833	5.01068	5.12158	6.21195	5.58644	6.30198	4.98238	5.15489	3.86139	4.75168	4.44735	4.58275	3.97147	4.74273	4.19667	4.53876	3.9392	4.03311
FBL	rRNA 2'-O-methyltransferase fibrillarin	cell differentiation;cell organization and biogenesis;metabolic process	chromosome;membrane;nucleus	catalytic activity;protein binding;RNA binding	Ribosome biogenesis in eukaryotes		6	6	6	6	1.017	0.999882	1.135	0.935691		0.494199	0.459206	0.479326	0.746742	0.61534	0.762652	1.26471	1.08401	1.20652	1.29061	1.17578	1.30578	0.545014	0.658982	0.836536	0.627838	0.67184	0.98923	1.27045	1.20034	1.30721	1.74908	1.84522	1.12611
FBLIM1	Filamin-binding LIM protein 1	cell organization and biogenesis;regulation of biological process	cytoplasm;cytoskeleton;cytosol	metal ion binding;protein binding			10	6	6	6	1.533	0.0395235	0.876	0.527327		4.30363	6.18572	3.15961	5.2333	6.94058	3.35389	5.76123	8.41981	6.44742	6.30637	7.51101	5.42877	3.98372	6.50763	2.37605	4.10759	8.87005	3.7906	8.51486	11.1532	7.54882	5.79035	8.21863	4.73952
FBLN2	Isoform 2 of Fibulin-2	cell organization and biogenesis;regulation of biological process	extracellular	metal ion binding;structural molecule activity			22	24	3	6	0.797	0.540723	0.903	0.757795		0.229989	0.410196	0.162347	0	0.237673	0.204862	0.145992	0.131565	0.24337	0.122478	0.190496	0.069055	0.0585776	0	0.0220662	0	0	0.0146996	0.200882	0.243164	0.219343	0.0392823	0.810373	0.275444
FBN1	Fibrillin-1	cell organization and biogenesis;metabolic process;regulation of biological process;response to stimulus	cell surface;extracellular;membrane;organelle lumen	metal ion binding;protein binding;structural molecule activity		Hypothesized Pathways in Pathogenesis of Cardiovascular Disease	6	6	14	6	0.928	0.944725	0.985	0.948767		0.771142	0.461038	1.46407	0.694257	0.664613	1.19472	0.47505	0.457808	0.502016	0.323907	0.34908	0.228822	0.273803	0.242842	0.174459	0.167118	0.187735	0.175208	0.188154	0.226452	0.195111	0.192402	0.237256	0.271845
FDPS	Farnesyl pyrophosphate synthase	metabolic process;regulation of biological process	cytoplasm;cytosol;mitochondrion	catalytic activity;metal ion binding;RNA binding	Influenza A; Terpenoid backbone biosynthesis; Metabolic pathways; HTLV-I infection	Sterol Regulatory Element-Binding Proteins (SREBP) signalling; Cholesterol Biosynthesis	6	6	6	6	1.432	0.105577	1.098	0.970006		2.03638	2.87795	1.63326	1.79332	2.31769	1.35144	1.59588	3.01367	1.75467	2.14941	2.85587	1.96076	1.61747	2.31067	1.72186	2.26981	2.23663	1.81635	1.30152	1.95014	1.25775	1.21835	1.78347	1.57491
FEN1	Flap endonuclease 1	cell organization and biogenesis;cellular homeostasis;metabolic process;regulation of biological process;response to stimulus	membrane;mitochondrion;nucleus	catalytic activity;DNA binding;metal ion binding;protein binding	Non-homologous end-joining; DNA replication; Base excision repair		8	28	18	25	0.128	4.06856e-11	100	1.00949e-16		0	0	0.13109	0.106384	0.0691585	0.295064	0.0383505	0.0600688	0.0581015	0.130112	0.173674	0.126695	0	0	0.0479192	0	0	0	0.0219962	0	0.122373	0.180948	0.316686	0.249284
FERMT2	Isoform 3 of Fermitin family homolog 2	cell organization and biogenesis;regulation of biological process;response to stimulus	cell surface;cytoplasm;cytosol;nucleus	protein binding			6	6	6	6	1.121	0.932516	0.979	0.915558		8.12241	10.3081	6.19573	6.20352	9.50042	3.60486	7.93135	7.87592	6.56986	8.77691	7.42757	6.45181	10.0616	11.6671	7.11358	7.17736	8.01706	6.13717	8.91982	10.1489	9.0421	7.27865	6.49774	6.03199
FERMT3	Fermitin family homolog 3	cell organization and biogenesis;regulation of biological process;response to stimulus;transport	extracellular;membrane;organelle lumen	protein binding	Platelet activation		6	6	6	6	1.123	0.919655	1.187	0.814931		1.6589	2.51899	1.74963	1.18619	1.32882	1.11127	2.05618	2.60202	2.24418	2.28363	2.18836	2.71846	2.8487	2.76349	3.46991	2.79005	2.63628	3.37912	2.3801	2.52134	2.82383	2.13742	2.01872	2.94432
FGD4	FYVE, RhoGEF and PH domain-containing protein 4	regulation of biological process		metal ion binding			3	11	10	10	20.011	8.91795e-17	2.486	0.000202592		0.0991034	0.337624	0.170608	0.213036	0.47477	0.20602	0	0.33524	0.0683743	0.113622	0.197218	0.127392	0.14526	0.582684	0.0922516	0.105477	0.159537	0.0923314	0	0.160439	0	0.0815994	0.138965	0
FGF2	Fibroblast growth factor 2	cell differentiation;cell organization and biogenesis;cell proliferation;cellular component movement;cellular homeostasis;development;metabolic process;regulation of biological process;response to stimulus;transport	extracellular;nucleus	catalytic activity;protein binding	Ras signaling pathway; Pathways in cancer; PI3K-Akt signaling pathway; Proteoglycans in cancer; MAPK signaling pathway; Melanoma; Breast cancer; Signaling pathways regulating pluripotency of stem cells; Rap1 signaling pathway; Regulation of actin cytoskeleton; EGFR tyrosine kinase inhibitor resistance	Focal Adhesion-PI3K-Akt-mTOR-signaling pathway; Lung fibrosis; Differentiation Pathway; Neural Crest Differentiation; Cardiac Hypertrophic Response; Endochondral Ossification; ESC Pluripotency Pathways; Mecp2 and Associated Rett Syndrome; Cardiac Progenitor Differentiation; Angiogenesis; MicroRNAs in cardiomyocyte hypertrophy; Regulation of Actin Cytoskeleton	6	6	6	6	0.645	0.0586929	1.164	0.918713		0.340307	0.201123	0.400076	0.301738	0.341086	0.387403	0.233486	0.226894	0.256303	0.263775	0.252924	0.304477	0.457779	0.267774	0.482196	0.521506	0.378337	0.584442	0.182935	0.0875599	0.157745	0.23489	0.139085	0.228037
FH	Fumarate hydratase, mitochondrial	metabolic process	cytoplasm;mitochondrion;organelle lumen	catalytic activity;protein binding	Metabolic pathways; Pyruvate metabolism; Renal cell carcinoma; Carbon metabolism; Pathways in cancer; Citrate cycle (TCA cycle)	TCA Cycle and Deficiency of Pyruvate Dehydrogenase complex (PDHc); Amino Acid metabolism; TCA Cycle	6	6	6	6	1.267	0.656947	1.303	0.424718		0.600184	0.621872	0.635721	0.325035	0.53347	0.568654	0.493649	0.689044	0.64098	0.417942	0.678677	0.556395	0.610563	0.678924	0.679596	0.493746	0.625983	0.475719	0.463943	0.612795	0.584751	0.382684	0.690182	0.515419
FHL1	Isoform 4 of Four and a half LIM domains protein 1	cell differentiation;regulation of biological process	cytoplasm;cytosol;membrane;nucleus	metal ion binding;protein binding		Notch Signaling Pathway	6	17	6	17	0.655	0.0124052	0.847	0.377673		14.8598	10.7252	11.7231	13.0983	9.53295	7.34383	37.3849	20.2958	31.4294	11.2492	14.5203	11.0596	20.6705	15.5699	16.433	13.1148	11.0325	12.4868	28.2729	14.3957	26.33	15.5306	10.1673	13.9708
FHL2	Four and a half LIM domains protein 2	cell differentiation;metabolic process;regulation of biological process;response to stimulus	nucleus	metal ion binding;protein binding		VEGFA-VEGFR2 Signaling Pathway; RANKL/RANK (Receptor activator of NFKB (ligand)) Signaling Pathway; Ectoderm Differentiation; Androgen receptor signaling pathway	6	6	25	6	0.971	0.955513	1.026	0.974055		10.3335	6.85639	9.62857	21.9398	16.5972	15.1788	12.5286	10.3734	13.1589	20.7841	19.6095	21.93	12.2519	13.4846	10.3017	24.9729	19.1139	22.745	17.5248	15.6166	18.0164	30.5304	18.708	22.0073
FHL3	Four and a half LIM domains protein 3	cell organization and biogenesis	nucleus	metal ion binding;protein binding			28	6	20	3	1.177	0.89631	0.976	0.920308		0	0	0	0	0	0.0245677	0.249936	0.229977	0.179937	0.0312754	0.287611	0.0690251	0.0255297	0	0	0.0388178	0.0350213	0.0445082	0.134129	0.158443	0.201229	0.232842	0.421237	0.181873
FILIP1L	Filamin A-interacting protein 1-like	metabolic process	cytoplasm;membrane;nucleus	catalytic activity;motor activity			6	6	6	6	0.923	0.93977	0.886	0.588402		0.436983	0.338176	0.444701	0.933879	0.922662	0.578891	0.793764	0.484415	0.658818	0.613867	0.82766	0.620686	0.382169	0.370548	0.190848	0.429046	0.618235	0.408971	0.61572	0.448923	0.417824	0.631049	0.688824	0.437357
FIP1L1	Pre-mRNA 3'-end-processing factor FIP1	metabolic process;transport	nucleus	protein binding;RNA binding	mRNA surveillance pathway		6	6	6	6	0.907	0.902423	1.085	0.978079		0.130204	0.135537	0.141481	0.258632	0.22691	0.14567	0.495247	0.461309	0.447947	0.462569	0.634984	0.525304	0.325443	0.155717	0.278745	0.235046	0.101047	0.255309	0.446626	0.323524	0.42996	0.530546	0.499349	0.521345
FKBP10	Peptidyl-prolyl cis-trans isomerase FKBP10	cell organization and biogenesis;metabolic process	cytoplasm;endoplasmic reticulum;organelle lumen	catalytic activity;metal ion binding			6	6	6	6	1.478	0.0763895	0.876	0.527327		19.8095	31.0768	20.7287	24.9256	27.4618	22.668	16.2196	13.2529	10.8439	19.6816	19.809	15.1229	16.1188	22.5266	10.604	12.8355	13.1454	11.5787	16.2229	25.209	14.9301	17.8942	15.0343	10.1953
FKBP11	Peptidyl-prolyl cis-trans isomerase FKBP11	metabolic process	cytoplasm;membrane	catalytic activity			3	25	15	6	1.142	0.937191	0.895	0.727881		0.528653	0.0842104	0.119218	0.109164	0.165009	0.123974	0.140278	0.168516	0.132776	0.1035	0.191059	0.179731	0.356976	0.408015	0.271064	0.0552765	0.234365	0.163458	0.0485786	0.157401	0.154867	0.143861	0.228807	0.288204
FKBP15	FK506-binding protein 15	cell differentiation;cell organization and biogenesis;cellular component movement;metabolic process;regulation of biological process;transport	cytoplasm;cytoskeleton;endosome;extracellular;Golgi;membrane;nucleus	catalytic activity;motor activity;protein binding;structural molecule activity;transporter activity		TYROBP Causal Network	6	6	6	6	1.003	0.99965	1.045	0.972026		0.13357	0.133293	0.125938	0.16282	0.111166	0.120261	0.103432	0.136779	0.156805	0.182518	0.181904	0.174734	0.0523241	0.0846357	0.112493	0.0859272	0.0272	0.115097	0.0751431	0.0987255	0.14245	0.131824	0.0790068	0.158315
FKBP2	Peptidyl-prolyl cis-trans isomerase FKBP2	metabolic process	endoplasmic reticulum;membrane	catalytic activity;protein binding			6	6	6	6	1.151	0.836372	1.001	0.942067		2.83371	2.87123	2.37718	2.13703	2.47518	2.25069	2.00512	2.12191	1.84288	1.9902	2.16493	1.92792	1.87756	2.27989	1.82251	1.94397	2.23448	2.22483	1.27797	1.73601	1.25534	1.23206	1.59697	1.21478
FKBP3	Peptidyl-prolyl cis-trans isomerase FKBP3	metabolic process	cytoplasm;nucleus	catalytic activity;protein binding;receptor activity;RNA binding			6	6	6	6	1.007	0.99965	1.249	0.604435		4.03549	3.53919	4.41142	4.02311	3.75898	4.73811	3.42397	4.12092	4.15685	3.93592	3.85749	4.56587	3.73772	3.19256	4.19807	4.07574	3.74915	4.38048	3.29847	4.26216	3.49278	3.68877	3.98084	4.68725
FKBP4	Peptidyl-prolyl cis-trans isomerase FKBP4	cell organization and biogenesis;metabolic process;regulation of biological process;response to stimulus;transport	cytoplasm;cytoskeleton;cytosol;mitochondrion;nucleus	catalytic activity;nucleotide binding;protein binding;RNA binding	Estrogen signaling pathway	Androgen receptor signaling pathway	6	6	6	6	0.862	0.637733	1.229	0.689962		2.15786	2.01885	2.63116	3.71702	3.02258	3.88019	2.03815	1.94315	2.56514	3.13784	2.57737	3.19399	2.22594	2.11036	2.24054	2.45138	2.52951	2.60029	2.56697	2.66087	2.58946	3.48708	2.80399	2.62593
FKBP7	Peptidyl-prolyl cis-trans isomerase FKBP7	metabolic process	cytoplasm;endoplasmic reticulum;organelle lumen	catalytic activity;metal ion binding;protein binding			3	18	13	24	1.443	0.716809	0.01	1.00949e-16		0.0084725	0	0	0	0	0	0	0.0191474	0	0	0.0327443	0.0294409	0.0569592	0.0474662	0.0260392	0.0135739	0.0541371	0.0225878	0.0136409	0.0241909	0	0	0.00788624	0.029209
FKBP8	Peptidyl-prolyl cis-trans isomerase FKBP8	cell death;metabolic process;regulation of biological process;response to stimulus	cytoplasm;cytosol;endoplasmic reticulum;membrane;mitochondrion	catalytic activity;metal ion binding;protein binding		Senescence and Autophagy in Cancer	6	6	6	6	0.998	0.99965	0.953	0.838855		0.505484	0.444687	0.409873	0.420116	0.352057	0.458378	0.46719	0.471971	0.451236	0.507748	0.491953	0.504596	0.446554	0.462236	0.505478	0.483802	0.464386	0.458646	0.599477	0.606499	0.510902	0.52145	0.660392	0.73659
FKBP9	Isoform 3 of Peptidyl-prolyl cis-trans isomerase FKBP9	metabolic process	cytoplasm;endoplasmic reticulum	catalytic activity;metal ion binding			6	6	6	6	1.143	0.890923	0.741	0.0448782		7.32301	8.5249	5.58287	7.05831	6.50658	4.83381	4.8664	3.47303	3.35398	7.0894	6.16237	4.52414	6.01575	6.37156	3.89436	7.31132	5.60398	5.92606	5.79816	6.93139	5.05027	7.12247	5.16282	3.64323
FLII	Protein flightless-1 homolog	cell organization and biogenesis;development;metabolic process;regulation of biological process	cytoplasm;cytoskeleton;cytosol;nucleus	protein binding			6	6	6	6	1.296	0.417796	1.084	0.982079		1.39543	1.91458	1.49569	2.07535	1.95092	1.51551	1.50524	1.60147	1.33159	2.18436	1.91463	1.6717	1.63621	2.02057	1.59097	1.86841	1.53052	1.62994	1.25772	1.51472	1.23543	1.57968	1.65763	1.59527
FLNA	Filamin-A	cell organization and biogenesis;cellular component movement;metabolic process;regulation of biological process;response to stimulus;transport	cytoplasm;cytoskeleton;cytosol;extracellular;membrane;nucleus	protein binding;RNA binding;signal transducer activity	MAPK signaling pathway; Salmonella infection; Focal adhesion; Proteoglycans in cancer	Hypothesized Pathways in Pathogenesis of Cardiovascular Disease; IL-4 Signaling Pathway; Focal Adhesion; Prolactin Signaling Pathway; MAPK Signaling Pathway; Androgen receptor signaling pathway	6	6	6	6	1.257	0.54576	0.902	0.647143		537.415	865.363	458.403	750.424	1018.14	406.741	781.582	853.223	679.473	813.342	861.256	575.972	763.457	999.145	456.306	691.615	983.857	628.693	837.578	1011.6	766.953	798.369	987.421	646.192
FLNB	Isoform 8 of Filamin-B	cell organization and biogenesis;regulation of biological process;response to stimulus	cytoplasm;cytoskeleton;cytosol;membrane;nucleus	protein binding;RNA binding		VEGFA-VEGFR2 Signaling Pathway	6	6	6	6	1.206	0.707497	1.142	0.905733		24.3178	35.5258	29.6015	46.682	52.757	32.9392	38.6462	43.4853	40.8255	76.5134	77.0564	57.3059	40.3569	40.497	27.6317	59.0911	61.2572	59.5816	49.4385	66.1342	57.2839	79.3491	83.9887	76.4771
FLNC	Filamin-C	cell organization and biogenesis	cytoplasm;cytoskeleton;cytosol;membrane	protein binding	MAPK signaling pathway; Salmonella infection; Focal adhesion; Proteoglycans in cancer		6	6	6	6	0.847	0.55014	1.09	0.971032		36.6474	37.9378	44.5733	62.1925	57.2511	45.8872	38.6183	27.3075	37.8137	53.2651	35.8398	40.2442	54.2341	46.2944	37.8312	43.5469	42.572	46.6537	46.0973	34.9654	51.9206	58.8403	39.3503	49.4063
FLOT1	Flotillin-1	cell organization and biogenesis;regulation of biological process;response to stimulus;transport	cytoskeleton;endosome;membrane	protein binding	Insulin signaling pathway	Angiopoietin Like Protein 8 Regulatory Pathway; Insulin Signaling	6	6	24	3	1.058	0.985293	0.986	0.8917		0.247397	0.545623	0.600698	0.481357	2.24745	0.504433	0.825936	1.76337	0.793969	0.751022	1.60697	0.765931	0.762848	0.558036	0.657757	0.742282	0.771579	0.673629	1.05406	1.1692	0.858564	0.994377	2.22393	0.796217
FMR1	Isoform 7 of Fragile X mental retardation protein 1	metabolic process;regulation of biological process;response to stimulus;transport	chromosome;cytoplasm;cytosol;membrane;nucleus;ribosome	protein binding;RNA binding;translation regulator activity			6	22	6	6	0.921	0.932516	1.572	0.256092		0.0671097	0.0509333	0.132146	0.135431	0.132113	0.131767	0	0.106888	0.131982	0	0.0993818	0.122274	0.119403	0.135318	0.123202	0.131241	0.103543	0.123356	0.12357	0	0.102147	0	0.0985875	0
FN1	Fibronectin	cell differentiation;cell organization and biogenesis;cellular component movement;defense response;metabolic process;regulation of biological process;response to stimulus;transport	extracellular;membrane;organelle lumen	enzyme regulator activity;protein binding	Pathways in cancer; Bacterial invasion of epithelial cells; AGE-RAGE signaling pathway in diabetic complications; Small cell lung cancer; Focal adhesion; ECM-receptor interaction; Proteoglycans in cancer; PI3K-Akt signaling pathway; Amoebiasis; Regulation of actin cytoskeleton	Senescence and Autophagy in Cancer; TGF-beta Signaling Pathway; Regulation of Actin Cytoskeleton; Focal Adhesion-PI3K-Akt-mTOR-signaling pathway; Association Between Physico-Chemical Features and Toxicity Associated Pathways; Rac1/Pak1/p38/MMP-2 pathway; miRNA targets in ECM and membrane receptors; Inflammatory Response Pathway; Focal Adhesion; miR-509-3p alteration of YAP1/ECM axis; TGF-B Signal…	6	6	6	6	1.156	0.860718	0.723	0.0271695		14.6175	17.6956	11.5724	13.1251	17.0752	13.2607	12.4837	16.5523	10.2042	9.41332	12.4115	9.67126	13.2674	12.2442	5.81169	6.89648	7.39855	6.94918	13.9281	15.505	8.07056	12.7225	14.5367	9.93431
FNDC3B	Fibronectin type III domain-containing protein 3B		membrane	protein binding;RNA binding			3	6	10	6	1.333	0.569405	0.943	0.873177		0	0.235843	0.0793423	0.154989	0.147959	0.0969381	0.129943	0.121041	0.0665321	0.064536	0.166598	0.0958458	0.148635	0.359649	0.0685809	0.180215	0.107404	0.0634894	0.0620777	0.0649254	0.0661405	0.0611382	0.118958	0.0744999
FSCN1	Fascin	cell organization and biogenesis;cell proliferation;cellular component movement;regulation of biological process	cytoplasm;cytoskeleton;cytosol	protein binding;RNA binding	MicroRNAs in cancer		6	6	6	6	1.054	0.99965	1.061	0.994811		13.9726	12.0281	13.7457	22.4175	18.3497	21.4162	12.5597	12.0989	12.6439	20.1051	16.5604	20.2318	19.2323	21.2519	16.5528	20.2582	17.2118	20.664	16.4442	18.6965	18.041	23.265	17.6139	20.1204
FSTL1	Follistatin-related protein 1	metabolic process;regulation of biological process;response to stimulus;transport	extracellular;membrane;organelle lumen	metal ion binding;protein binding;transporter activity			10	6	6	6	1.466	0.218148	0.704	0.0368945		0.501835	0.72359	0.38438	0.824601	0.948333	0.561019	0.311742	0.451867	0.324108	0.60586	0.650915	0.376149	0.310487	0.604493	0.0561519	0.351615	0.626292	0.318641	0.555858	0.721915	0.301631	0.438699	0.572933	0.37163
FTH1	Ferritin heavy chain	cellular homeostasis;metabolic process;regulation of biological process;response to stimulus;transport	cytosol;extracellular;nucleus;vacuole	catalytic activity;metal ion binding;protein binding	Mineral absorption	NRF2 pathway; Iron metabolism in placenta	14	17	14	17	0.504	2.96545e-06	1.111	0.948867		5.08438	1.78143	5.38795	2.95746	1.82231	4.68536	3.05603	1.79064	3.45013	1.71233	1.21465	1.95393	2.55253	1.41358	4.81789	3.05687	1.67848	2.81283	3.7713	2.21941	3.59337	2.27895	1.08872	1.36895
FTL	Ferritin light chain	cellular homeostasis;transport	cytosol;extracellular;membrane;organelle lumen;vacuole	metal ion binding;protein binding	Mineral absorption	NRF2 pathway	14	17	14	6	0.433	2.01659e-06	1.414	0.140987		2.41269	0.602765	1.84046	0.805726	0.517626	1.37951	0.819736	0.447712	0.911412	0.53897	0.33845	0.706826	0.843404	0.153663	1.23243	1.27925	0.638091	1.38017	1.36388	0.678523	1.53676	0.624532	0.263298	0.613771
FTSJ3	pre-rRNA processing protein FTSJ3	metabolic process	nucleus	catalytic activity;protein binding;RNA binding			6	6	6	6	0.922	0.925875	1.135	0.964282		0.132941	0.143079	0.170266	0.163859	0.209814	0.124015	0.115948	0.128802	0.152112	0.126815	0.209548	0.145664	0.18626	0.154205	0.225735	0.142524	0.0994736	0.144788	0.142988	0.247209	0.192629	0.162328	0.198444	0.176747
FUBP1	Far upstream element-binding protein 1	metabolic process;regulation of biological process	nucleus	DNA binding;protein binding;RNA binding			6	6	6	6	0.834	0.480958	1.229	0.67399		7.52389	6.17498	8.60414	8.891	7.70613	11.1934	6.7868	6.6089	8.23495	8.65365	7.73378	9.22053	6.56905	5.62625	7.09523	7.02163	5.691	6.85567	5.74048	5.14019	6.27348	7.05168	6.23313	6.27366
FUBP3	Far upstream element-binding protein 3	metabolic process;regulation of biological process	cytoplasm;membrane;nucleus	DNA binding;protein binding;RNA binding			6	6	6	6	1.013	0.99965	1.182	0.842575		2.02449	1.84575	2.2855	2.12208	1.63799	2.17487	1.4412	1.35084	1.60506	1.98494	1.4182	1.66048	1.38375	1.48558	1.55979	1.50564	1.25675	1.70932	0.869251	0.961087	0.691301	1.30525	1.08885	1.25064
FUS	RNA-binding protein FUS	regulation of biological process		metal ion binding;RNA binding			6	6	6	6	0.715	0.208545	1.16	0.881819		0.615159	0.251625	0.566092	0.697982	0.623735	0.893723	0.747974	0.658387	1.17394	1	1.38824	1.32	0.8141	0.555679	0.637345	0.702362	0.769493	0.743286	1.01524	0.67353	1.01298	0.675888	0.871469	0.887011
FXR1	Fragile X mental retardation syndrome-related protein 1	cell death;cell differentiation;development;regulation of biological process	cytoplasm;cytosol;membrane;nucleus	protein binding;RNA binding	RNA transport		6	6	6	6	1	0.99965	1.054	0.982079		1.12332	1.1978	1.33802	1.2805	1.11738	1.28925	0.995936	0.910136	0.902166	1.36297	1.18871	1.76152	1.28434	0.885136	0.9072	0.788869	0.849352	0.832046	0.818193	0.988575	0.882706	0.980631	0.931215	0.855588
FXR2	Fragile X mental retardation syndrome-related protein 2	regulation of biological process	cytoplasm;cytosol;membrane;nucleus	protein binding;RNA binding	RNA transport		20	5	20	28	100	8.91795e-17				0	0	0	0	0	0.0320837	0	0.0222237	0	0.0255743	0.0266924	0.0318381	0	0	0	0	0	0.0301616	0	0.0243922	0	0	0	0
FYCO1	Isoform 4 of FYVE and coiled-coil domain-containing protein 1	cellular component movement;metabolic process;regulation of biological process;transport	endosome;Golgi;membrane;vacuole	metal ion binding;nucleotide binding;protein binding			6	6	6	6	0.835	0.707497	0.945	0.773845		0.496256	0.332466	0.490063	0.391801	0.345673	0.513214	0.79597	0.5456	0.693798	0.639663	0.550236	0.733525	0.496723	0.476712	0.38965	0.18499	0.372511	0.502897	0.855054	0.463134	0.626505	0.81932	0.276499	0.53047
G3BP1	Ras GTPase-activating protein-binding protein 1	metabolic process;regulation of biological process;response to stimulus;transport	cytoplasm;cytosol;membrane;nucleus	catalytic activity;DNA binding;nucleotide binding;protein binding;RNA binding			6	6	6	6	1.192	0.772604	1.169	0.873177		1.50805	1.24477	1.60948	1.13413	0.833228	0.928778	1.5645	1.61168	1.68247	2.23025	2.19767	2.44952	1.78892	1.8286	2.06544	1.96636	1.76484	1.69417	0.44627	0.664786	0.533569	0.688369	0.558444	0.650942
G3BP2	Ras GTPase-activating protein-binding protein 2	cell organization and biogenesis;regulation of biological process;response to stimulus;transport	cytoplasm;cytosol	protein binding;RNA binding;structural molecule activity			6	6	6	6	1.009	0.99965	0.939	0.719956		0.890971	0.952587	1.06173	1.49615	1.44831	1.30407	0.87433	0.816671	0.81765	1.16551	1.16511	1.10609	0.761688	1.16051	0.646035	0.640956	0.904889	0.648504	1.47307	1.18686	1.01541	1.00784	1.17119	0.932496
G6PD	Isoform Long of Glucose-6-phosphate 1-dehydrogenase	metabolic process;regulation of biological process;response to stimulus	cytoplasm;cytosol;membrane;nucleus	catalytic activity;nucleotide binding;protein binding		Pentose Phosphate Pathway; ATM Signaling Network in Development and Disease; Cori Cycle; Glutathione metabolism; NRF2 pathway; Sulfation Biotransformation Reaction	6	6	6	6	1.135	0.909612	1.07	0.986467		24.5021	26.8446	22.6136	15.7181	16.0837	17.6547	21.649	26.9198	21.0427	17.688	18.2636	21.2732	19.902	17.5297	21.3555	19.0373	22.273	23.6709	20.5132	25.1901	21.0519	19.0908	15.6764	21.9836
GAA	Lysosomal alpha-glucosidase	cell organization and biogenesis;cellular homeostasis;metabolic process;regulation of biological process;response to stimulus;transport	membrane;organelle lumen;vacuole	catalytic activity	Starch and sucrose metabolism; Lysosome; Metabolic pathways; Galactose metabolism		6	6	6	6	0.815	0.49326	1.059	0.994811		1.89343	1.04829	1.57259	1.17998	0.987868	1.98878	1.67506	1.42735	1.78693	1.18956	1.05862	1.3261	1.4182	1.24443	2.0194	1.78208	1.24269	1.71499	1.28027	0.884687	1.34671	1.30535	1.10048	1.06842
GAB1	Isoform 2 of GRB2-associated-binding protein 1	cell organization and biogenesis;cell proliferation;cellular component movement;metabolic process;regulation of biological process;response to stimulus	cytosol	catalytic activity;protein binding		ESC Pluripotency Pathways; Signaling Pathways in Glioblastoma; ErbB Signaling Pathway; EGF/EGFR Signaling Pathway; Signaling of Hepatocyte Growth Factor Receptor; B Cell Receptor Signaling Pathway; BDNF-TrkB Signaling; VEGFA-VEGFR2 Signaling Pathway; Insulin Signaling; IL-6 signaling pathway; Alpha 6 Beta 4 signaling pathway	6	3	6	6	1.447	0.34904	1.008	0.948867		0.227905	0.316261	0.211228	0.183971	0.278799	0.129455	0.100047	0.0942811	0.124016	0.124806	0.147269	0.101155	0.0424015	0.118163	0.0381469	0.100419	0.0571136	0.0461955	0.122571	0.180851	0.101331	0.094149	0.11911	0.0322255
GALK1	Isoform 2 of Galactokinase	metabolic process	cytoplasm;cytosol;membrane	catalytic activity;nucleotide binding			6	6	6	6	1.216	0.764878	1.151	0.910174		0.387715	0.376063	0.626708	0.668607	0.523035	0.525832	0.523741	0.670053	0.62366	0.545467	0.575197	0.62695	0.354096	0.681008	0.789569	0.766719	0.818072	0.70994	0.391076	0.507048	0.411308	0.473037	0.462261	0.510009
GALM	Aldose 1-epimerase	metabolic process	cytoplasm	catalytic activity	Metabolic pathways; Galactose metabolism; Glycolysis / Gluconeogenesis		25	25	18	14	0.939	0.973438	1.21	0.948767		0.123327	0	0.081993	0	0.0851569	0.196766	0.066617	0.0596167	0.112005	0.0846419	0	0.108459	0.0579699	0.0829405	0.117195	0.231814	0.159085	0.26704	0.0738515	0.0857581	0.19301	0.282994	0.071775	0.349395
GALNT1	Polypeptide N-acetylgalactosaminyltransferase 1	metabolic process	extracellular;Golgi;membrane	catalytic activity;metal ion binding	Mucin type O-glycan biosynthesis; Metabolic pathways		6	28	6	6	0.972	0.980274	0.897	0.762969		0.0888693	0.143141	0.060985	0.0689357	0.101358	0.0880552	0.108817	0.139727	0.100488	0.156841	0.144007	0.127965	0.0723536	0.113131	0.0541247	0.0699946	0.0702686	0.0692547	0	0	0.0242693	0.048219	0.0830464	0.0667636
GALNT2	Polypeptide N-acetylgalactosaminyltransferase 2	metabolic process	extracellular;Golgi;membrane	catalytic activity;metal ion binding;protein binding	Metabolic pathways; Mucin type O-glycan biosynthesis	Globo Sphingolipid Metabolism	6	6	6	6	1.26	0.597302	1.101	0.962227		0.610802	1.07862	0.778873	0.672391	0.281827	0.878086	0.788602	0.816489	0.713728	0.721606	0.679898	0.663381	0.566913	0.103799	0.417243	0.39797	0.370125	0.129023	0.960988	1.12224	0.877248	1.24842	0.90952	1.18006
GANAB	Isoform 2 of Neutral alpha-glucosidase AB	metabolic process	Golgi;membrane;organelle lumen	catalytic activity;RNA binding			24	6	25	3	1.626	0.36009	13.36	1.00949e-16		0	0	0.0205595	0.027426	0.0158426	0.0305629	0.0394659	0.069636	0.0552103	0	0.0698194	0.0465048	0	0	0.0273656	0	0.0373194	0.030342	0.0505857	0.0724457	0.0836326	0.0919047	0.126506	0.0963839
GAP43	Neuromodulin	cell differentiation;cell organization and biogenesis;cellular component movement;development;regulation of biological process;response to stimulus	cytoplasm;membrane	protein binding		Glial Cell Differentiation; Spinal Cord Injury	14	14	14	14	0.028	8.91795e-17	1.218	0.726914		2.13068	0.159747	2.87056	1.15472	0.0405245	2.19414	2.43297	0	2.5083	1.36407	0	1.80682	5.10531	0	4.21297	5.02392	0.380201	4.55114	2.5417	0.0546688	3.18945	3.63585	0	4.44101
GAPDH	Glyceraldehyde-3-phosphate dehydrogenase	cell death;cell organization and biogenesis;defense response;metabolic process;regulation of biological process;response to stimulus	cytoplasm;cytoskeleton;cytosol;membrane;nucleus	catalytic activity;enzyme regulator activity;nucleotide binding;protein binding	Glycolysis / Gluconeogenesis; HIF-1 signaling pathway; Metabolic pathways; Alzheimer's disease; Biosynthesis of amino acids; Carbon metabolism	Alzheimers Disease; Sudden Infant Death Syndrome (SIDS) Susceptibility Pathways; Cori Cycle; Glycolysis and Gluconeogenesis	6	6	6	6	1.093	0.960382	0.947	0.831178		113.134	92.6187	79.662	103.387	79.9602	74.4447	116.014	105.249	98.4526	118.278	101.351	95.7085	142.917	197.303	137.871	138.287	147.647	130.743	95.0473	104.065	89.6285	111.436	70.9122	71.3944
GARS	Glycine--tRNA ligase	metabolic process	cytoplasm;cytosol;extracellular;mitochondrion;organelle lumen	catalytic activity;nucleotide binding;protein binding	Aminoacyl-tRNA biosynthesis		6	17	6	6	0.66	0.0144041	0.84	0.342627		22.5044	16.4913	16.7492	22.8691	14.5018	12.7297	16.761	9.21799	9.80324	18.9076	9.69609	10.3726	17.5142	13.8381	13.5193	9.00971	7.81758	8.63727	21.4501	12.1157	15.6016	14.854	6.57181	7.34634
GART	Trifunctional purine biosynthetic protein adenosine-3	metabolic process;response to stimulus	cytoplasm;cytosol	catalytic activity;metal ion binding;nucleotide binding	One carbon pool by folate; Antifolate resistance; Metabolic pathways; Purine metabolism	Folate Metabolism; One Carbon Metabolism	3	25	6	6	1.009	0.99965	1.257	0.645795		0.511139	0.548934	0.329731	0.272241	0.551931	0.418013	0.427163	0.560283	0.657098	0.438366	0.572355	0.713524	0.684087	0.66432	0.138688	0.185149	0.23189	0.332838	0.184926	0.173305	0.184916	0.3736	0.207496	0.366841
GAS6	Growth arrest-specific protein 6		cell surface;extracellular;membrane	metal ion binding			6	10	18	0	100	8.91795e-17	100	1.00949e-16		0	0.0747287	0.0584755	0.070313	0.0703252	0.154638	0	0	0	0	0	0	0	0.07419	0.0417674	0.0483017	0.0479733	0.0626817	0	0.048568	0	0.0475318	0.0513834	0
GATA6	Transcription factor GATA-6	cell differentiation;coagulation;metabolic process;regulation of biological process;response to stimulus	membrane;nucleus	DNA binding;metal ion binding;protein binding		Ectoderm Differentiation; Endoderm Differentiation; Heart Development; Mesodermal Commitment Pathway	0	0	28	18	0.01	8.91795e-17	0.01	1.00949e-16		0	0	0	0.0151081	0.0191269	0.0183864	0.017252	0	0	0	0.0180698	0.0251276	0	0	0	0	0	0	0	0	0	0	0	0
GATAD2A	Isoform 3 of Transcriptional repressor p66-alpha	metabolic process;regulation of biological process	nucleus	DNA binding;metal ion binding;protein binding			8	25	6	28	100	8.91795e-17	100	1.00949e-16		0.149228	0.09691	0.19014	0.136716	0.0655363	0.202388	0	0.045296	0.0391617	0.0377531	0.146112	0.14201	0	0	0.0401616	0	0	0	0	0.0729446	0.109295	0.168402	0.149963	0.166508
GATAD2B	Transcriptional repressor p66-beta	cell organization and biogenesis;metabolic process;regulation of biological process	nucleus	DNA binding;metal ion binding;protein binding			28	6	6	25	0.926	0.953345	1.27	0.920308		0.0562363	0.121031	0.0674612	0.0487639	0.136822	0.0892212	0.0439254	0.0717046	0.0560962	0.121944	0.0744886	0.149179	0	0	0.0386104	0.125066	0.0914019	0.0490099	0.0366106	0.0465545	0	0.0574623	0.0452453	0.05212
GBA	Glucosylceramidase	cell communication;cell death;cell organization and biogenesis;metabolic process;regulation of biological process;response to stimulus	membrane;organelle lumen;vacuole	catalytic activity;protein binding	Other glycan degradation; Sphingolipid metabolism; Metabolic pathways; Lysosome		6	17	17	6	0.804	0.570061	1.015	0.948867		1.13587	0.478681	0.673105	0.523098	0.333678	0.359526	0.701036	0.334146	0.601475	0.5229	0.343234	0.269677	0.933199	0.75898	1.04701	0.720834	0.576311	0.522075	0.605197	0.477861	0.487999	0.191117	0.184801	0.0952542
GBE1	1,4-alpha-glucan-branching enzyme	metabolic process	cytosol	catalytic activity;protein binding	Starch and sucrose metabolism; Metabolic pathways	Glycogen Metabolism	3	6	3	6	1.304	0.394211	0.841	0.350897		4.16855	6.37745	4.03386	3.17772	3.35268	2.37137	4.32696	4.8403	3.44771	3.22651	2.83098	2.66949	4.96753	8.04226	3.69801	3.14753	5.72966	3.5872	5.43888	5.74125	4.20172	3.74015	2.53783	3.01955
GBF1	Golgi-specific brefeldin A-resistance guanine nucleotide exchange factor 1	cell organization and biogenesis;cellular component movement;metabolic process;regulation of biological process;response to stimulus;transport	cytoplasm;cytosol;Golgi;membrane;mitochondrion;organelle lumen	protein binding	Endocytosis		6	6	6	6	1.035	0.99965	0.848	0.6246		0.0757538	0.147394	0.108951	0.0950683	0.131853	0.0757802	0.0929185	0.0914321	0.0738562	0.0984314	0.132709	0.130788	0.0898187	0.0960497	0.0697248	0.0694774	0.10227	0.0553514	0.123369	0.110706	0.111079	0.125191	0.143242	0.127462
GBP1	Interferon-induced guanylate-binding protein 1	cell organization and biogenesis;defense response;regulation of biological process;response to stimulus	cytoplasm;cytosol;extracellular;Golgi;membrane	catalytic activity;nucleotide binding;protein binding	NOD-like receptor signaling pathway	Type II interferon signaling (IFNG)	6	6	6	6	0.882	0.736141	0.932	0.757795		0.955842	1.77036	0.938963	1.51064	1.59205	1.26243	1.86634	1.3786	1.65153	1.73255	1.94083	1.55242	1.39172	1.28183	0.888188	1.35319	1.52847	1.348	2.55047	1.62249	1.959	2.20534	2.04725	2.29462
GCLM	Glutamate--cysteine ligase regulatory subunit	cell organization and biogenesis;cellular homeostasis;metabolic process;regulation of biological process;response to stimulus	cytosol	catalytic activity;enzyme regulator activity;protein binding	Cysteine and methionine metabolism; Glutathione metabolism; Metabolic pathways	Amino Acid metabolism; Photodynamic therapy-induced NFE2L2 (NRF2) survival signaling; Trans-sulfuration pathway; Transcriptional activation by NRF2; One carbon metabolism and related pathways; NRF2 pathway; Trans-sulfuration and one carbon metabolism; Glutathione metabolism	6	18	17	7	0.893	0.87204	1.076	0.988182		0.473907	0.204641	0.220852	0.174646	0.0264162	0.31967	0.309768	0.380812	0.261864	0.0972913	0.0986129	0.275577	0.441861	0.313601	0.416369	0.357247	0.330641	0.28577	0.0401833	0.0498201	0.054646	0.0277595	0	0.154396
GCN1L1	Translational activator GCN1	cell communication;metabolic process;regulation of biological process;response to stimulus	cytoplasm;cytosol;membrane;ribosome	enzyme regulator activity;protein binding;RNA binding			6	6	6	6	1.278	0.479043	1.161	0.891016		1.70317	2.51491	2.36929	2.08891	2.18208	1	0.942587	1.69984	1.416	1.75713	1.69637	1.41983	0.897374	1.56833	0.919166	2.33431	1.14078	1.31975	2.33774	2.34034	1.73518	1.85996	1.94936	1.56666
GDI1	Rab GDP dissociation inhibitor alpha	metabolic process;regulation of biological process;response to stimulus;transport	cytoplasm;cytosol;Golgi	catalytic activity;enzyme regulator activity;protein binding		Integrated Breast Cancer Pathway	6	6	6	6	1.023	0.99965	1.091	0.972026		2.9482	3.31416	3.17275	4.1513	4.21812	3.36582	4.23331	3.72845	4.00913	4.4693	4.27462	4.51452	3.80906	3.87463	3.52417	4.0024	3.86755	4.53649	3.56092	3.7358	3.66956	4.02651	3.47902	3.69547
GDI2	Rab GDP dissociation inhibitor beta	regulation of biological process;response to stimulus;transport	cytoplasm;cytosol;extracellular;membrane;organelle lumen	enzyme regulator activity;protein binding;RNA binding			6	6	6	6	1.149	0.880321	1.066	0.98927		21.794	23.6619	19.7956	19.7029	20.422	17.7763	21.4207	22.9768	22.0827	20.8582	20.7668	21.5446	20.099	20.5946	20.0655	18.3706	18.2133	18.3926	19.6686	20.8344	19.3867	19.2554	16.7595	21.01
GFAP	Isoform 2 of Glial fibrillary acidic protein	cell differentiation;cell organization and biogenesis;regulation of biological process;response to stimulus;transport	cytoplasm;cytoskeleton;cytosol;vacuole	catalytic activity;motor activity;protein binding;structural molecule activity;transporter activity		Neural Crest Differentiation; Spinal Cord Injury	19	10	4	4	2.174	1.97413e-06	1.55	0.0236649		8.18669	15.0453	11.5103	0.474359	3.03689	4.35579	3.77296	9.35476	6.40146	0.636274	2.21636	2.97768	1.87299	1.1515	9.216	0.713319	1.01835	1.48413	0.395409	1.40684	0.428403	0.576748	1.59945	0.84834
GFPT1	Glutamine--fructose-6-phosphate aminotransferase [isomerizing] 1	metabolic process;regulation of biological process	cytosol	catalytic activity	Amino sugar and nucleotide sugar metabolism; Metabolic pathways; Alanine, aspartate and glutamate metabolism; Insulin resistance		3	6	6	6	1.168	0.804856	0.96	0.857841		3.05077	4.25933	2.56311	5.37516	4.68258	2.70736	4.14698	3.50453	2.6827	4.7236	5.02584	3.25667	2.97457	5.30499	2.41108	2.03188	3.24111	1.87075	3.4942	3.30105	3.19459	3.80773	3.26385	2.74705
GFPT2	Glutamine--fructose-6-phosphate aminotransferase [isomerizing] 2	metabolic process	cytosol	catalytic activity;protein binding	Amino sugar and nucleotide sugar metabolism; Metabolic pathways; Insulin resistance; Alanine, aspartate and glutamate metabolism		5	16	5	6	2.217	0.0573894	1.296	0.904787		0	0.0906198	0	0.00873263	0.00960571	0	0.0122442	0.0639946	0.0393732	0.0511239	0.0223938	0.0637918	0.019782	0.0805958	0	0	0	0	0	0	0.042162	0.0113357	0.0133018	0.0777863
GGCT	Gamma-glutamylcyclotransferase	cell organization and biogenesis;metabolic process	cytosol	catalytic activity;protein binding	Glutathione metabolism		6	6	25	6	0.896	0.904777	1.131	0.947009		0.135541	0.255353	0.277327	0.500275	0.684807	0.427646	0.655178	0.478659	0.538164	0.426185	0.613233	0.445912	0.344254	0.450385	0.33849	0.402036	0.511135	0.420737	0.397643	0.359458	0.419384	0.455836	0.449601	0.478681
GGT5	Gamma-glutamyltransferase 5	defense response;metabolic process;response to stimulus	membrane	catalytic activity	Taurine and hypotaurine metabolism; Glutathione metabolism; Metabolic pathways; Arachidonic acid metabolism	Glutathione metabolism	6	3	3	3	1.854	0.000663103	1.164	0.881819		0.897646	1.98127	1.03381	0.495457	1.2267	0.764554	1.13248	2.11116	1.40015	0.455157	0.815173	0.52484	0.993512	1.16054	1.251	0.885499	1.25132	0.781485	1.44585	2.63559	1.3123	1.14406	1.70207	1.1122
GGT7	Gamma-glutamyltransferase 7	metabolic process;regulation of biological process	membrane	catalytic activity;protein binding	Taurine and hypotaurine metabolism; Metabolic pathways; Glutathione metabolism		11	24	11	24	100	8.91795e-17	100	1.00949e-16		0	0.0980057	0	0	0.0538148	0	0	0.0431901	0.0282208	0	0.10079	0.0309922	0	0.0512715	0	0	0.0564621	0.029612	0	0.0395534	0	0	0.0760799	0.0247961
GIGYF2	PERQ amino acid-rich with GYF domain-containing protein 2		cytosol	protein binding			10	6	6	6	1.067	0.99965	1.348	0.796593		0.0681987	0.0667133	0.128234	0.13231	0.131055	0.0888662	0.0743005	0.0806505	0.101303	0.101244	0.139203	0.0804574	0	0.0684915	0.0668443	0.0355636	0.0981762	0.0419702	0.034059	0.0801314	0.0687931	0.0997937	0.104732	0.0425805
GIPC1	PDZ domain-containing protein GIPC1	cell communication;cellular component movement;regulation of biological process;response to stimulus;transport	cytoplasm;cytosol;membrane	protein binding		VEGFA-VEGFR2 Signaling Pathway	6	6	6	25	0.851	0.770455	0.815	0.210918		0.616206	0.463812	0.36645	0.730724	0.450689	0.506741	0.12048	0.0700448	0.179989	0.265768	0.18251	0.282531	0.549098	0.484513	0.461895	0.442385	0.368292	0.400157	0.783128	0.826206	0.707199	0.528898	0.474484	0.381028
GJA1	Gap junction alpha-1 protein	cell communication;cell death;cell organization and biogenesis;cellular homeostasis;defense response;regulation of biological process;response to stimulus;transport	cytoplasm;endoplasmic reticulum;endosome;Golgi;membrane;mitochondrion;vacuole	protein binding;signal transducer activity;transporter activity	Gap junction; Arrhythmogenic right ventricular cardiomyopathy (ARVC)	TarBasePathway; VEGFA-VEGFR2 Signaling Pathway; Arrhythmogenic Right Ventricular Cardiomyopathy; EGF/EGFR Signaling Pathway; Myometrial Relaxation and Contraction Pathways; Spinal Cord Injury; Sudden Infant Death Syndrome (SIDS) Susceptibility Pathways; Corticotropin-releasing hormone signaling pathway; Calcium Regulation in the Cardiac Cell; Wnt Signaling Pathway Netpath	6	21	21	25	1.077	0.999489	0.909	0.920676		0	0	0	0.121116	0.0468834	0	0.0335295	0.027177	0.0319159	0.123127	0.0646199	0.0752023	0.0590016	0.0830418	0.0439664	0.114826	0.0978111	0.111868	0	0	0	0.0600071	0	0
GLB1	Beta-galactosidase	metabolic process;response to stimulus;transport	cytoplasm;extracellular;Golgi;organelle lumen;vacuole	catalytic activity;protein binding	Lysosome; Galactose metabolism; Other glycan degradation; Glycosaminoglycan degradation; Glycosphingolipid biosynthesis - ganglio series; Metabolic pathways; Sphingolipid metabolism	Ectoderm Differentiation	6	6	6	6	0.871	0.751658	0.996	0.899995		1.21355	0.539217	0.761743	0.520228	0.605529	0.736757	0.939664	0.784883	0.934678	0.667969	0.716396	0.712506	1.07222	0.968327	1.17787	0.858006	0.868544	0.961287	0.756939	0.703185	0.847916	0.522611	0.553915	0.591273
GLG1	Isoform 2 of Golgi apparatus protein 1	cellular component movement;regulation of biological process	Golgi;membrane	protein binding			6	6	6	6	0.989	0.979508	0.906	0.637676		3.1793	3.64625	2.75173	3.74914	3.63611	3.86101	3.30362	3.60496	3.09715	3.25696	3.58719	2.88952	3.44416	2.80501	3.43154	3.12916	2.73792	2.91024	4.56324	4.16516	2.78644	3.82846	4.03829	3.6815
GLIPR2	Golgi-associated plant pathogenesis-related protein 1	regulation of biological process	extracellular;Golgi;membrane	protein binding			6	6	6	6	0.626	0.0105128	1.03	0.969631		1.60463	1.10878	1.62152	0.953562	0.600832	1.18915	1.24109	0.874437	1.28912	1.27265	0.796882	1.47094	1.97657	0.963308	1.89188	1.93754	1.03845	1.77732	1.78909	1.33845	1.73607	2.00928	1.07096	1.85453
GLOD4	Isoform 2 of Glyoxalase domain-containing protein 4		mitochondrion	protein binding			6	6	6	6	0.825	0.511513	1.155	0.901455		1.31171	0.895095	1.14643	1.2809	1.02441	1.07067	1.56924	1.27901	1.59067	1.51733	1.30654	1.66901	1.58517	1.19703	1.72956	1.33356	1.63894	1.71864	1.2899	1.17088	1.37879	1.6779	1.24427	1.75842
GLRX	Glutaredoxin-1	cellular homeostasis;metabolic process;regulation of biological process;transport	cytoplasm;cytosol;mitochondrion;nucleus	catalytic activity;protein binding		One Carbon Metabolism	6	3	6	6	1.493	0.0464595	1.172	0.862642		3.04609	4.23194	2.55381	2.85929	2.58105	2.30542	2.38414	3.8571	2.40243	1.78794	1.67622	2.03717	2.09274	2.73264	1.98323	1.8157	1.64756	1.67716	1.55449	2.49815	0.789932	0.672231	0.645528	0.519075
GLRX3	Glutaredoxin-3	cell organization and biogenesis;cellular homeostasis;metabolic process;regulation of biological process	cytoplasm;cytosol;nucleus;spliceosomal complex	catalytic activity;metal ion binding;protein binding;RNA binding			6	6	6	6	0.783	0.529007	0.985	0.930766		0.479668	0.357003	0.351082	0.442744	0.494728	0.634143	0.994699	1.01603	1.04813	0.752177	0.853112	1.00509	0.388753	0.349407	0.424705	0.398759	0.428726	0.44546	0.333879	0.277711	0.359232	0.378285	0.372049	0.377014
GLS	Isoform 3 of Glutaminase kidney isoform, mitochondrial	cell communication;cell organization and biogenesis;metabolic process;regulation of biological process;response to stimulus;transport	cytosol;mitochondrion;organelle lumen	catalytic activity;protein binding		Amino Acid metabolism	6	6	6	6	0.99	0.977801	1.065	0.998304		2.92793	3.33933	3.35237	3.83704	5.08333	4.73022	3.07135	3.10202	2.37569	3.07533	3.32932	3.13103	2.26473	2.42832	1.94247	1.78019	2.81266	2.09344	2.7671	2.18581	2.70806	2.78474	2.80268	2.26819
GLUD1	Glutamate dehydrogenase 1, mitochondrial	cell organization and biogenesis;metabolic process;regulation of biological process	cytoplasm;mitochondrion;organelle lumen	catalytic activity;nucleotide binding;protein binding	Alanine, aspartate and glutamate metabolism; Arginine biosynthesis; D-Glutamine and D-glutamate metabolism; Proximal tubule bicarbonate reclamation; Metabolic pathways; Nitrogen metabolism; Carbon metabolism	Amino Acid metabolism; Urea cycle and metabolism of amino groups	6	6	6	6	1.075	0.979508	1.369	0.230413		12.9843	9.18122	17.8183	6.37513	8.32203	13.1978	11.9324	15.9909	14.8959	8.33131	9.47233	11.2783	9.71249	7.73731	17.885	6.44853	5.83604	7.83896	7.24541	10.5707	10.281	6.71988	9.80901	9.17798
GLUL	Glutamine synthetase	cell communication;cell organization and biogenesis;cell proliferation;metabolic process;regulation of biological process;response to stimulus;transport	cytoplasm;cytosol;endoplasmic reticulum;mitochondrion;nucleus	catalytic activity;metal ion binding;nucleotide binding;protein binding	Biosynthesis of amino acids; Arginine biosynthesis; Nitrogen metabolism; Alanine, aspartate and glutamate metabolism; Metabolic pathways; Glyoxylate and dicarboxylate metabolism; GABAergic synapse; Glutamatergic synapse	Amino Acid metabolism; TNF alpha Signaling Pathway	10	11	10	11	4.081	4.11108e-12	1.384	0.642772		0.154759	0.272083	0.130254	0.133291	0.380496	0.106934	0.171346	0.994608	0.204547	0.171553	0.374895	0.134973	0.064652	0.268149	0.0919478	0.067408	0.338167	0.0607482	0	0.501711	0.0286166	0.108197	0.292279	0
GMFB	Glia maturation factor beta (Fragment)	regulation of biological process		protein binding			6	6	6	6	1.005	0.99965	1.046	0.97627		0.95194	0.726642	0.868765	0.961009	0.938404	0.964395	1.18411	1.09927	1.11726	0.898954	0.965194	0.978632	0.966118	1.11359	0.983537	0.820129	0.898961	0.853764	0.668798	0.613641	0.615799	0.669709	0.542558	0.693709
GMPPA	Isoform 2 of Mannose-1-phosphate guanyltransferase alpha	metabolic process	cytoplasm	catalytic activity;protein binding			6	6	6	6	1.032	0.99965	0.989	0.90017		0.546192	0.533557	0.528414	0.558171	0.552832	0.554904	0.712835	0.709867	0.656854	0.572964	0.673692	0.626491	0.668029	0.684136	0.566123	0.603365	0.56339	0.497187	0.519872	0.61859	0.576149	0.582946	0.664756	0.758742
GMPPB	Isoform 2 of Mannose-1-phosphate guanyltransferase beta	metabolic process	cytoplasm;mitochondrion	catalytic activity;nucleotide binding;protein binding			6	6	6	6	1.268	0.534345	1.086	0.982079		0.974891	1.19384	1.04173	1.00259	1.13527	1.05916	1.03733	1.13057	1.24873	0.432975	1.2096	1.42838	0.732499	1.01142	0.769978	0.849999	0.369506	0.220096	0.639068	0.845564	0.341633	1.04799	0.595427	1.10505
GMPS	GMP synthase [glutamine-hydrolyzing]	metabolic process	cytoplasm;cytosol	catalytic activity;nucleotide binding	Metabolic pathways; Purine metabolism; Drug metabolism - other enzymes		16	6	6	6	0.51	0.0024613	1.227	0.757714		0.496272	0.174115	0.558482	0.431977	0.365803	0.608028	0.58785	0.375064	0.422396	0.355734	0.154035	0.397074	0.0285803	0	1.62977	0	0.26711	3.46747	0.400944	0.26325	0.381039	0.48409	0.452307	0.454191
GNA11	Guanine nucleotide-binding protein subunit alpha-11	regulation of biological process;response to stimulus	cytoplasm;membrane	catalytic activity;metal ion binding;nucleotide binding;protein binding;signal transducer activity	Long-term depression; Vascular smooth muscle contraction; GnRH signaling pathway; Insulin secretion; Chagas disease (American trypanosomiasis); cGMP-PKG signaling pathway; Cholinergic synapse; Amoebiasis; Aldosterone synthesis and secretion; Gap junction; Pathways in cancer; Calcium signaling pathway	Corticotropin-releasing hormone signaling pathway; G Protein Signaling Pathways; GPR40 PATHWAY; Calcium Regulation in the Cardiac Cell	6	6	6	6	0.997	0.990061	1.126	0.948867		1.40057	1.47061	1.9195	1.37851	0.810819	1.52698	1.55318	1.41197	1.70898	1.49551	1.26667	1.83907	1.67718	1.32484	1.81262	1.88862	1.43541	1.79452	2.33205	1.93583	2.34944	2.87487	2.05099	2.83491
GNA13	Guanine nucleotide-binding protein subunit alpha-13	cell differentiation;cellular component movement;cellular homeostasis;regulation of biological process;response to stimulus	cytoplasm;cytosol;membrane;nucleus	catalytic activity;metal ion binding;nucleotide binding;protein binding;signal transducer activity	Regulation of actin cytoskeleton; cGMP-PKG signaling pathway; Platelet activation; Long-term depression; Phospholipase D signaling pathway; Sphingolipid signaling pathway; Pathways in cancer; Vascular smooth muscle contraction	Human Thyroid Stimulating Hormone (TSH) signaling pathway; Regulation of Actin Cytoskeleton; G13 Signaling Pathway; G Protein Signaling Pathways	6	6	6	6	0.905	0.931611	1.058	0.999288		0.322834	0.370152	0.376662	0.252315	0.256282	0.282054	0.357459	0.362649	0.362012	0.469829	0.488563	0.464774	0.457742	0.331704	0.444377	0.449605	0.368909	0.486192	0.321105	0.387394	0.422675	0.3696	0.296169	0.429581
GNAI2	Guanine nucleotide-binding protein G(i) subunit alpha-2	cell division;cell proliferation;metabolic process;regulation of biological process;response to stimulus	cytoplasm;cytoskeleton;cytosol;membrane;nucleus	catalytic activity;metal ion binding;nucleotide binding;protein binding;signal transducer activity	Pertussis; Regulation of lipolysis in adipocytes; Morphine addiction; Chemokine signaling pathway; Renin secretion; Cocaine addiction; Serotonergic synapse; Parkinson's disease; Gap junction; cAMP signaling pathway; Oxytocin signaling pathway; GABAergic synapse; Glutamatergic synapse; Retrograde endocannabinoid signaling; Dopaminergic synapse; Toxoplasmosis; Cholinergic synapse; Rap1 signaling pa…	Corticotropin-releasing hormone signaling pathway; Calcium Regulation in the Cardiac Cell; Signal Transduction of S1P Receptor; Chemokine signaling pathway; Human Thyroid Stimulating Hormone (TSH) signaling pathway; G Protein Signaling Pathways	6	6	6	6	0.986	0.977999	1.114	0.948867		11.0211	11.8884	12.3829	11.8009	11.5592	8.92413	15.6082	14.7978	14.0796	17.0374	14.1516	14.8366	18.0965	15.8675	16.305	17.6129	13.0654	16.3112	12.2506	12.7774	12.8811	15.284	11.6237	15.3687
GNAQ	Guanine nucleotide-binding protein G(q) subunit alpha	coagulation;regulation of biological process;response to stimulus	cytoplasm;membrane;nucleus	catalytic activity;enzyme regulator activity;metal ion binding;nucleotide binding;protein binding;signal transducer activity	cGMP-PKG signaling pathway; Adrenergic signaling in cardiomyocytes; Gastric acid secretion; Amoebiasis; Long-term potentiation; Aldosterone synthesis and secretion; Platelet activation; Dopaminergic synapse; Circadian entrainment; Melanogenesis; Cholinergic synapse; Huntington's disease; Glucagon signaling pathway; Inflammatory mediator regulation of TRP channels; Glutamatergic synapse; Insulin s…	Alzheimers Disease; Corticotropin-releasing hormone signaling pathway; Serotonin Receptor 2 and STAT3 Signaling; Calcium Regulation in the Cardiac Cell; G Protein Signaling Pathways; Circadian rythm related genes; Regulation of Microtubule Cytoskeleton; Human Thyroid Stimulating Hormone (TSH) signaling pathway; Serotonin Receptor 2 and ELK-SRF/GATA4 signaling; Myometrial Relaxation and Contractio…	6	6	6	6	0.955	0.940342	1.386	0.193276		1.42209	1.67083	1.93568	1.86968	1.71098	1.56691	2.20047	1.90672	2.03236	2.21866	2.06455	2.51753	2.54737	2.33832	3.39391	3.18117	2.54404	3.11836	2.19187	2.25545	2.33494	2.64851	2.1909	2.57327
GNAS	Guanine nucleotide-binding protein G(s) subunit alpha isoforms XLas	metabolic process;regulation of biological process;response to stimulus	cytosol;membrane	catalytic activity;metal ion binding;nucleotide binding;protein binding;signal transducer activity		Corticotropin-releasing hormone signaling pathway; Serotonin Receptor 4/6/7 and NR3C Signaling; Calcium Regulation in the Cardiac Cell; G Protein Signaling Pathways; Endothelin Pathways; Human Thyroid Stimulating Hormone (TSH) signaling pathway; Estrogen signaling pathway; Myometrial Relaxation and Contraction Pathways; Common Pathways Underlying Drug Addiction	6	6	6	6	1.126	0.925875	1.167	0.873177		2.62345	3.2832	3.50692	3.49711	3.02396	2.71881	3.30478	3.18927	3.10451	3.87582	3.4752	3.65917	3.64239	3.71522	3.65476	3.63272	3.32221	3.42939	2.98496	3.47705	3.17602	3.58078	3.3658	3.75248
GNB1	Guanine nucleotide-binding protein G(I)/G(S)/G(T) subunit beta-1	cell death;cell organization and biogenesis;cell proliferation;cellular homeostasis;metabolic process;regulation of biological process;response to stimulus	cytosol;membrane	catalytic activity;protein binding;signal transducer activity	Olfactory transduction; Serotonergic synapse; Chemokine signaling pathway; GABAergic synapse; Morphine addiction; Glutamatergic synapse; Cholinergic synapse; Dopaminergic synapse; Alcoholism; Pathways in cancer; PI3K-Akt signaling pathway; Ras signaling pathway; Retrograde endocannabinoid signaling; Circadian entrainment; Phototransduction	Corticotropin-releasing hormone signaling pathway; Nicotine Activity on Dopaminergic Neurons; Calcium Regulation in the Cardiac Cell; G Protein Signaling Pathways; Chemokine signaling pathway; Human Thyroid Stimulating Hormone (TSH) signaling pathway; Estrogen signaling pathway; Myometrial Relaxation and Contraction Pathways; Focal Adhesion-PI3K-Akt-mTOR-signaling pathway	6	6	6	6	1.051	0.99965	1.203	0.757795		3.96199	3.49412	4.30991	3.49161	3.28333	3.86475	3.80612	4.61132	4.56555	4.43464	4.26847	4.73954	6.49375	5.71441	7.09936	8.18424	6.13465	8.09018	1.87407	3.477	1.15261	3.80516	3.26243	3.92635
GNB2	Guanine nucleotide-binding protein G(I)/G(S)/G(T) subunit beta-2 (Fragment)	regulation of biological process;response to stimulus		protein binding		Focal Adhesion-PI3K-Akt-mTOR-signaling pathway; Chemokine signaling pathway	6	6	6	6	0.997	0.984872	1.166	0.873177		3.85494	2.98874	3.52025	2.30668	2.2903	2.4465	2.81127	3.01782	3.22542	3.6237	2.75047	3.58852	4.17362	3.60792	4.52971	4.70281	3.54304	4.63034	1.66317	1.97929	1.833	1.97914	1.68084	2.12109
GNB2L1	Guanine nucleotide-binding protein subunit beta-2-like 1	cell death;cellular homeostasis;development;metabolic process;regulation of biological process;response to stimulus	cytoplasm;cytosol;membrane;mitochondrion;nucleus;ribosome	enzyme regulator activity;protein binding;RNA binding;structural molecule activity	Measles	Brain-Derived Neurotrophic Factor (BDNF) signaling pathway; Androgen receptor signaling pathway; VEGFA-VEGFR2 Signaling Pathway; Interferon type I signaling pathways	6	6	6	6	1.069	0.984872	1.128	0.935691		17.4879	16.4447	16.7745	19.0383	17.8373	18.6505	16.1769	17.7069	17.4375	18.9982	18.6895	19.8099	14.9556	16.582	14.847	13.9487	14.1102	14.5438	12.2933	13.1605	12.6936	15.3512	15.0191	15.6303
GNG12	Guanine nucleotide-binding protein G(I)/G(S)/G(O) subunit gamma-12	regulation of biological process;response to stimulus	membrane	protein binding;signal transducer activity	PI3K-Akt signaling pathway; Alcoholism; Morphine addiction; Serotonergic synapse; Chemokine signaling pathway; Retrograde endocannabinoid signaling; MAPK signaling pathway; Pathways in cancer; Cholinergic synapse; Circadian entrainment; Ras signaling pathway; Glutamatergic synapse; GABAergic synapse; Dopaminergic synapse; Regulation of actin cytoskeleton	Focal Adhesion-PI3K-Akt-mTOR-signaling pathway; Calcium Regulation in the Cardiac Cell; Regulation of Actin Cytoskeleton; Chemokine signaling pathway; Myometrial Relaxation and Contraction Pathways; G Protein Signaling Pathways	6	6	6	6	1.441	0.138864	0.939	0.723237		1.36193	1.52948	0.987277	0.997119	0.957336	0.5528	0.498147	0.751181	0.538124	1.04838	0.767231	0.897461	1.64332	1.91219	1.51113	1.6758	1.7009	1.23456	0.946467	1.3409	1.00068	0.799198	0.959603	1.24229
GNL1	Guanine nucleotide-binding protein-like 1	regulation of biological process;response to stimulus	nucleus	catalytic activity;nucleotide binding;structural molecule activity			25	6	17	6	1.084	0.993143	0.944	0.871141		0.0923702	0.111666	0.0884635	0	0	0.0643329	0.0571849	0.071949	0.0946214	0.0670461	0.05964	0.103232	0.0991802	0	0	0.0967518	0.0650028	0.114528	0.090501	0.086856	0.0736486	0.114276	0.086322	0.116832
GNL3	Guanine nucleotide-binding protein-like 3	cell division;cell proliferation;regulation of biological process	membrane;nucleus	catalytic activity;nucleotide binding;protein binding;RNA binding	Ribosome biogenesis in eukaryotes		6	6	6	6	0.967	0.973772	1.099	0.990978		0.169841	0.154442	0.260372	0.343915	0.213003	0.216318	0.120026	0.113093	0.139206	0.176928	0.110789	0.174879	0.132181	0.145876	0.178675	0.175975	0.0847024	0.18482	0.0910103	0.0862896	0.102362	0.126097	0.100649	0.0948835
GNS	N-acetylglucosamine-6-sulfatase	metabolic process;transport	extracellular;organelle lumen;vacuole	catalytic activity;metal ion binding;protein binding			6	6	6	6	0.857	0.614987	0.958	0.824478		2.42222	1.71258	1.82967	1.46447	1.50198	1.45816	2.23882	2.02713	1.94258	1.6445	1.59875	1.21622	1.64727	1.26726	2.12858	1.67534	1.60056	1.72011	1.59402	1.84071	1.37962	1.38514	1.47031	1.10598
GOLGA2	Golgin subfamily A member 2	cell division;cell organization and biogenesis;metabolic process;regulation of biological process;transport	cytoplasm;cytoskeleton;Golgi;membrane;nucleus	catalytic activity;motor activity;protein binding			17	25	6	6	0.984	0.985438	0.942	0.860449		0.313495	0.0910657	0.291212	0.324034	0.273844	0.428191	0.279159	0.106705	0.223414	0.252327	0.185466	0.158477	0.22152	0.0421502	0.168021	0.126037	0.136879	0.0245789	0	0.05039	0.104216	0.159854	0.137839	0.0678586
GOLGA3	Golgin subfamily A member 3	metabolic process;regulation of biological process;transport	cytoplasm;cytosol;Golgi;membrane;nucleus	catalytic activity;motor activity;protein binding;structural molecule activity;transporter activity			6	3	6	6	1.036	0.99965	1.039	0.97627		1.34722	1.53692	1.5082	1.83288	1.62402	1.87018	1.42331	1.32625	1.50068	1.54559	1.67941	1.7047	1.10675	1.05314	1.38212	1.07329	0.96545	0.906447	1.26813	3.28274	1.58922	1.73568	1.4858	1.49582
GOLGB1	Isoform 2 of Golgin subfamily B member 1	cell organization and biogenesis;metabolic process;regulation of biological process;transport	Golgi;membrane	catalytic activity;DNA binding;motor activity;protein binding;RNA binding;transporter activity			6	3	6	6	1.387	0.359331	1.069	0.990978		0.435231	0.890975	0.583588	0.949106	1.02592	0.743582	0.545256	0.597971	0.405422	0.630763	0.679397	0.44186	0.193677	0.273505	0.235454	0.31009	0.439866	0.207954	0.164287	0.892314	0.570474	0.304747	0.75031	0.366722
GOLIM4	Golgi integral membrane protein 4	transport	endosome;Golgi;membrane;organelle lumen				6	17	6	6	0.853	0.739399	0.959	0.886319		0.179337	0.198463	0.220219	0.201081	0.159987	0.244142	0.187588	0.139626	0.180022	0.223674	0.186417	0.162893	0.175786	0.136577	0.117432	0.0991792	0.077284	0.103882	0.237829	0.157422	0.173429	0.147919	0.151107	0
GOLPH3	Golgi phosphoprotein 3	cell organization and biogenesis;cell proliferation;cellular component movement;metabolic process;regulation of biological process;transport	cytosol;endosome;Golgi;membrane;mitochondrion	protein binding	Transcriptional misregulation in cancer		11	6	14	3	1.657	0.236186	1.213	0.948867		0.0414254	0	0.0416431	0	0.0452007	0.0478783	0.0288633	0.0997825	0.0315319	0	0.0325644	0.0868638	0	0.312683	0.11637	0.0123642	0.193935	0.0937907	0.0469879	0.0495401	0.0601519	0	0.0687461	0.0682599
GOLT1B	Vesicle transport protein GOT1B	regulation of biological process;response to stimulus;transport	endoplasmic reticulum;Golgi;membrane	signal transducer activity			3	6	12	6	1.2	0.839534	0.922	0.79047		0.0514191	0.0833783	0.377168	0.594753	0.0866722	0.0437318	0.125411	0.0847572	0.0697197	0.0632798	0.087015	0.0619445	0.365609	0.524369	0.201818	0.228326	0.299394	0.239752	0.263457	0.285217	0.230121	0.238739	0.171915	0.26587
GOPC	Golgi-associated PDZ and coiled-coil motif-containing protein	regulation of biological process		DNA binding;protein binding			25	28	25	27	0.787	0.688208	0.846	0.62346		0.140109	0.0851341	0.122318	0.41463	0.304219	0.465037	0.0462138	0.0906596	0	0.33389	0.358637	0.089104	0.121262	0.0983765	0.0422655	0.219844	0.239834	0.359019	0.0292991	0	0.130781	0.305741	0.326022	0.310627
GORASP2	Isoform 3 of Golgi reassembly-stacking protein 2	cell organization and biogenesis	Golgi;membrane	protein binding			6	6	6	6	0.885	0.862767	0.965	0.837573		1.69162	1.0991	1.3727	1.24228	1.12367	1.16677	0.736123	0.737589	0.674138	0.688797	0.735917	0.941433	0.682298	0.548373	0.489974	0.503149	0.485864	0.60876	0.527779	0.549038	0.480811	0.685421	0.717572	0.465918
GOT1	Aspartate aminotransferase, cytoplasmic	metabolic process;regulation of biological process;response to stimulus	cytoplasm;cytosol;mitochondrion;nucleus;vacuole	catalytic activity	Biosynthesis of amino acids; Carbon metabolism; Phenylalanine, tyrosine and tryptophan biosynthesis; Metabolic pathways; Phenylalanine metabolism; Tyrosine metabolism; Cysteine and methionine metabolism; Arginine and proline metabolism; 2-Oxocarboxylic acid metabolism; Alanine, aspartate and glutamate metabolism; Arginine biosynthesis	Trans-sulfuration pathway; Alanine and aspartate metabolism; Glycolysis and Gluconeogenesis; Amino Acid metabolism	6	6	6	6	0.89	0.803809	0.916	0.674866		2.14846	1.68831	1.47768	1.98208	1.5548	1.66344	1.6778	1.6875	1.39994	1.89985	0.956173	1.61428	1.45049	1.38265	1.51152	1.35581	1.23682	1.50424	1.76873	1.55801	1.52993	1.66638	1.17698	1.38428
GOT2	Aspartate aminotransferase, mitochondrial	metabolic process;response to stimulus;transport	cell surface;membrane;mitochondrion;organelle lumen	catalytic activity;protein binding;RNA binding	Biosynthesis of amino acids; Arginine biosynthesis; Metabolic pathways; Alanine, aspartate and glutamate metabolism; Fat digestion and absorption; Tyrosine metabolism; Cysteine and methionine metabolism; Phenylalanine, tyrosine and tryptophan biosynthesis; 2-Oxocarboxylic acid metabolism; Phenylalanine metabolism; Carbon metabolism; Arginine and proline metabolism	Glycolysis and Gluconeogenesis; Amino Acid metabolism; Alanine and aspartate metabolism	19	6	6	6	1.607	0.105873	1.086	0.989051		0.210572	0.119179	0.137047	0.111855	0.168715	0.140183	0.265007	0.404495	0.231211	0.356262	0.52593	0.437542	0.0793508	0.139438	0.406327	0.158451	0.101463	0.0485011	0.226433	0.376088	0.298785	0.15694	0.369066	0.370921
GPD2	Glycerol-3-phosphate dehydrogenase, mitochondrial	metabolic process;transport	membrane;mitochondrion	catalytic activity;metal ion binding	Glycerophospholipid metabolism	Fatty Acid Beta Oxidation	6	6	6	6	1.246	0.707497	1.272	0.624179		0.504897	0.414699	0.51041	0.313736	0.358437	0.465839	0.367466	0.521698	0.42608	0.429742	0.526978	0.542849	0.300777	0.320542	0.447507	0.288286	0.366149	0.30853	0.353224	0.495288	0.46694	0.367592	0.478879	0.520547
GPI	Isoform 2 of Glucose-6-phosphate isomerase	metabolic process;regulation of biological process;response to stimulus;transport	cytosol;extracellular;membrane;organelle lumen	catalytic activity;protein binding		Glycolysis and Gluconeogenesis; Cori Cycle	6	6	6	6	0.953	0.937168	0.873	0.51395		12.5808	13.6686	10.0911	18.1772	12.4943	8.64758	18.064	14.3177	15.1242	18.296	12.7246	12.4397	18.076	19.486	9.98828	16.0379	15.4553	14.7023	16.2145	12.9823	14.1066	19.1225	10.4018	14.2375
GPKOW	G patch domain and KOW motifs-containing protein	metabolic process	nucleus	protein binding			0	0	0	20						0	0	0	0	0	0	0	0	0	0	0	0.0320665	0	0	0	0	0	0	0	0	0	0	0	0
GPN1	Isoform 5 of GPN-loop GTPase 1		cytosol;mitochondrion	catalytic activity;nucleotide binding;protein binding			6	6	6	6	0.92	0.940895	1.182	0.950062		0.0944506	0.0336153	0.050672	0.141289	0.0830396	0.0878143	0.0747304	0.0858872	0.115867	0.132372	0.0925203	0.118733	0.0682232	0.0589128	0.0620686	0.0708947	0.140727	0.143406	0.0900891	0.0884763	0.0960113	0.121311	0.0894997	0.103936
GPS1	Isoform 2 of COP9 signalosome complex subunit 1	cell organization and biogenesis;metabolic process;regulation of biological process;response to stimulus	cytosol	enzyme regulator activity;protein binding			6	6	25	6	0.978	0.991693	1.123	0.948867		0.224439	0.21052	0.342113	0.500331	0.388288	0.524513	0.561438	0.647212	0.581197	0.451035	0.653495	0.657342	0.334547	0.342747	0.339073	0.401019	0.341089	0.483267	0.509452	0.360934	0.531392	0.748359	0.621534	0.750961
GPX1	Glutathione peroxidase 1	cell death;cell differentiation;cell proliferation;cellular component movement;cellular homeostasis;metabolic process;regulation of biological process;response to stimulus	cytoplasm;cytosol;mitochondrion;organelle lumen	antioxidant activity;catalytic activity;protein binding	Thyroid hormone synthesis; Glutathione metabolism; Arachidonic acid metabolism; Amyotrophic lateral sclerosis (ALS); Huntington's disease	Folate Metabolism; Selenium Metabolism and Selenoproteins; TYROBP Causal Network; Association Between Physico-Chemical Features and Toxicity Associated Pathways; Oxidative Stress; Glutathione metabolism; Selenium Micronutrient Network; One carbon metabolism and related pathways; Amyotrophic lateral sclerosis (ALS)	14	25	6	6	0.729	0.313555	1.65	0.00201763		0.477444	0.310323	0.577317	0.523026	0.475918	0.735271	0.550163	0.573686	0.852506	0.485996	0.410115	0.645237	0.603906	0.250548	1.40248	0.770478	0.232567	0.874752	0.271321	0.203438	0.452616	0.69865	0.562487	0.815492
GPX8	Probable glutathione peroxidase 8	metabolic process;response to stimulus	membrane;organelle lumen	antioxidant activity;catalytic activity	Thyroid hormone synthesis; Glutathione metabolism; Arachidonic acid metabolism		6	6	6	6	0.914	0.843429	0.963	0.857885		1.98429	2.78268	2.45028	2.4596	2.46827	2.11338	2.67484	2.2804	2.24027	2.60612	2.25114	2.31396	2.19531	1.888	1.63528	1.47278	1.28202	1.3964	1.97153	1.95784	1.93731	2.29303	1.98116	2.31036
[truncated: 1,336 more rows]

## Sheet: Cytoplasmic-enriched proteomics
															Median intensity	514425	480331	530825	513538	461287	529493	497139	495812	509728	482780	495528	510763	495838	472552	553283	499165	477613	498757	487987	477797	509420	488112	502769	526400
															# of Proteins	1903	1901	1909	1888	1900	1934	1905	1965	1967	1936	1957	1957	1884	1880	1905	1882	1902	1906	1904	1941	1936	1938	1953	1941
															Component	Cytoplasmic fraction	Cytoplasmic fraction	Cytoplasmic fraction	Cytoplasmic fraction	Cytoplasmic fraction	Cytoplasmic fraction	Cytoplasmic fraction	Cytoplasmic fraction	Cytoplasmic fraction	Cytoplasmic fraction	Cytoplasmic fraction	Cytoplasmic fraction	Cytoplasmic fraction	Cytoplasmic fraction	Cytoplasmic fraction	Cytoplasmic fraction	Cytoplasmic fraction	Cytoplasmic fraction	Cytoplasmic fraction	Cytoplasmic fraction	Cytoplasmic fraction	Cytoplasmic fraction	Cytoplasmic fraction	Cytoplasmic fraction
															Media	NM	OM	PM	NM	OM	PM	NM	OM	PM	NM	OM	PM	NM	OM	PM	NM	OM	PM	NM	OM	PM	NM	OM	PM
		GO terms					XINA Cluster#				P1 OM/NM ratio		P1 PM/NM ratio		Passage	P1	P1	P1	P4	P4	P4	P1	P1	P1	P4	P4	P4	P1	P1	P1	P4	P4	P4	P1	P1	P1	P4	P4	P4
[truncated: 2,078 more rows]

## Sheet: Nuclear-enriched proteomics
															Median intensity	257527	258354	268558	251585	263244	303283	246210	271986	255574	291347	316003	277242	243436	257987	279891	222135	258416	229112	262274	274314	266105	450015	306062	310593
[truncated: 2,091 more rows]
